# Supplementary material for: The COVID-19 pandemic “anthropause” decreased plastic ingestion in neotropic cormorants Nannopterum brasilianus in Lima, Peru
Source: PeerJ. 2024 May 30;12:e17407. doi: 10.7717/peerj.17407 (PMC11144399; doi:10.7717/peerj.17407)
Supplement: Supplemental Information 4 — The data were used to determine changes in diet composition in cormorants, before and during the pandemic. The values distributed by year and month. The pellet column refers to the total number of pellets found in each month. In the Number of Otoliths section you can see the different fish preys classified by their scientific name, each number corresponds to the amount of otoliths found. [file peerj-12-17407-s004.xlsx]

## Sheet: Costa Verde
Year	Month	Pellets	Number of Otoliths
			Sciaena deliciosa	Anchoa nasus	Engraulis ringens	Mugil cephalus	Stelifer minor	Odontesthes regia	Isacia conceptionis	Prionotus stephanophrys	Menticirrhus ophicephalus	Paralonchurus peruanus
2018	Octubre	115	33	149	42	0	57	14	0	0	0	0
2018	Noviembre	71	15	434	68	0	143	19	0	0	0	0
2018	Diciembre	89	12	102	49	1	93	6	1	0	0	0
2019	Enero	15	25	66	13	0	31	8	0	0	0	0
2019	Febrero	11	22	75	3	0	11	1	0	0	0	0
2019	Julio	74	44	128	10	0	40	12	0	0	0	0
2019	Agosto	18	12	67	19	3	38	10	0	0	1	0
2019	Septiembre	23	35	86	9	0	24	8	0	0	0	0
2019	Octubre	91	7	92	9	2	28	9	0	1	0	0
2019	Noviembre	29	17	124	36	3	49	6	3	0	0	0
2019	Diciembre	51	8	209	21	8	23	11	0	3	2	0
2020	Febrero	21	10	35	9	0	15	3	0	0	0	0
2020	Junio	8	1	15	2	0	3	1	0	0	0	0
2020	Julio	17	19	27	14	2	5	0	0	0	0	0
2020	Agosto	23	11	25	23	0	17	8	0	0	1	0
2020	Septiembre	13	0	11	7	2	21	10	0	0	0	0
2020	Octubre	53	36	56	32	1	21	3	0	0	0	0
2020	Noviembre	51	10	29	9	3	14	3	1	0	0	0
2020	Diciembre	16	2	9	5	0	4	2	0	0	0	0
2021	Enero	26	4	16	14	1	8	4	0	0	0	0
2021	Febrero	16	17	24	0	0	48	3	0	0	0	3
Total		831	340	1779	394	26	693	141	5	4	4	3
