# Supplementary material for: The COVID-19 pandemic “anthropause” decreased plastic ingestion in neotropic cormorants Nannopterum brasilianus in Lima, Peru
Source: PeerJ. 2024 May 30;12:e17407. doi: 10.7717/peerj.17407 (PMC11144399; doi:10.7717/peerj.17407)
Supplement: Supplemental Information 5 [file peerj-12-17407-s005.xlsx]

## Sheet: Table
Code	Date	Number of collection	Total number of items	Otoliths	Shell remains	Snails	Bivalves	Parasites	fish remains	sea urchin remains	stones	Debris plastic items	Debris non-plastic items	Limpet	Poliplacophorus plates	Crustacean remains	Algae	Size (mm)	General classification	Plastic clasification	Color	Pandemic	Non-plastic presence	Plastic presence	Debris presence
B 20181015 - 01	2018-10-15	1	5	1	0	0	1	0	0	0	3	0	0	0	0	0	0					0		0	0
B 20181015 - 02	2018-10-15	1	4	3	0	0	0	0	0	0	1	0	0	0	0	0	0					0		0	0
B 20181015 - 03	2018-10-15	1	5	3	0	0	0	0	0	0	1	0	0	0	0	0	1					0		0	0
B 20181015 - 04	2018-10-15	1	0	0	0	0	0	0	0	0	0	0	0	0	0	0	0					0		0	0
B 20181015 - 05	2018-10-15	1	0	0	0	0	0	0	0	0	0	0	0	0	0	0	0					0		0	0
B 20181015 - 06	2018-10-15	1	0	0	0	0	0	0	0	0	0	0	0	0	0	0	0					0		0	0
B 20181015 - 07	2018-10-15	1	0	0	0	0	0	0	0	0	0	0	0	0	0	0	0					0		0	0
B 20181015 - 08	2018-10-15	1	7	4	0	0	0	0	1	0	2	0	0	0	0	0	0					0		0	0
B 20181015 - 09	2018-10-15	1	5	5	0	0	0	0	0	0	0	0	0	0	0	0	0					0		0	0
B 20181015 - 10	2018-10-15	1	11	11	0	0	0	0	0	0	0	0	0	0	0	0	0					0		0	0
B 20181015 - 11	2018-10-15	1	1	1	0	0	0	0	0	0	0	0	0	0	0	0	0					0		0	0
B 20181015 - 12	2018-10-15	1	2	2	0	0	0	0	0	0	0	0	0	0	0	0	0					0		0	0
B 20181015 - 13	2018-10-15	1	1	0	0	1	0	0	0	0	0	0	0	0	0	0	0					0		0	0
B 20181015 - 14	2018-10-15	1	5	5	0	0	0	0	0	0	0	0	0	0	0	0	0					0		0	0
B 20181015 - 15	2018-10-15	1	6	6	0	0	0	0	0	0	0	0	0	0	0	0	0					0		0	0
B 20181015 - 16	2018-10-15	1	4	0	0	0	1	0	0	0	3	0	0	0	0	0	0					0		0	0
B 20181015 - 17	2018-10-15	1	9	8	0	0	1	0	0	0	0	0	0	0	0	0	0					0		0	0
B 20181015 - 18	2018-10-15	1	0	0	0	0	0	0	0	0	0	0	0	0	0	0	0					0		0	0
B 20181015 - 19	2018-10-15	1	0	0	0	0	0	0	0	0	0	0	0	0	0	0	0					0		0	0
B 20181015 - 20	2018-10-15	1	3	2	0	1	0	0	0	0	0	0	0	0	0	0	0					0		0	0
B 20181015 - 21	2018-10-15	1	1	1	0	0	0	0	0	0	0	0	0	0	0	0	0					0		0	0
B 20181015 - 22	2018-10-15	1	1	1	0	0	0	0	0	0	0	0	0	0	0	0	0					0		0	0
B 20181015 - 23	2018-10-15	1	0	0	0	0	0	0	0	0	0	0	0	0	0	0	0					0		0	0
B 20181015 - 24	2018-10-15	1	4	0	0	0	0	0	0	0	2	1	0	0	0	0	1	3.17	Plastic	Sheetlike	Green	0		1	1
B 20181015 - 25	2018-10-15	1	0	0	0	0	0	0	0	0	0	0	0	0	0	0	0					0		0	0
B 20181015 - 26	2018-10-15	1	1	0	0	0	0	0	0	0	0	1	0	0	0	0	0	6.97	Plastic	Sheetlike	Green	0		1	1
B 20181015 - 27	2018-10-15	1	0	0	0	0	0	0	0	0	0	0	0	0	0	0	0					0		0	0
B 20181015 - 28	2018-10-15	1	0	0	0	0	0	0	0	0	0	0	0	0	0	0	0					0		0	0
B 20181015 - 29	2018-10-15	1	3	3	0	0	0	0	0	0	0	0	0	0	0	0	0					0		0	0
B 20181015 - 30	2018-10-15	1	5	5	0	0	0	0	0	0	0	0	0	0	0	0	0					0		0	0
B 20181015 - 31	2018-10-15	1	3	1	0	0	0	0	1	0	1	0	0	0	0	0	0					0		0	0
B 20181015 - 32	2018-10-15	1	1	1	0	0	0	0	0	0	0	0	0	0	0	0	0					0		0	0
B 20181015 - 33	2018-10-15	1	2	2	0	0	0	0	0	0	0	0	0	0	0	0	0					0		0	0
B 20181015 - 34	2018-10-15	1	3	3	0	0	0	0	0	0	0	0	0	0	0	0	0					0		0	0
B 20181015 - 35	2018-10-15	1	5	0	0	0	0	0	0	0	5	0	0	0	0	0	0					0		0	0
B 20181015 - 36	2018-10-15	1	0	0	0	0	0	0	0	0	0	0	0	0	0	0	0					0		0	0
B 20181015 - 37	2018-10-15	1	4	3	0	0	0	0	0	0	0	1	0	0	0	0	0	2.96	Plastic	Fragment	Black	0		1	1
B 20181015 - 38	2018-10-15	1	6	6	0	0	0	0	0	0	0	0	0	0	0	0	0					0		0	0
B 20181015 - 39	2018-10-15	1	0	0	0	0	0	0	0	0	0	0	0	0	0	0	0					0		0	0
B 20181015 - 40	2018-10-15	1	7	7	0	0	0	0	0	0	0	0	0	0	0	0	0					0		0	0
B 20181015 - 41	2018-10-15	1	0	0	0	0	0	0	0	0	0	0	0	0	0	0	0					0		0	0
B 20181015 - 42	2018-10-15	1	1	0	0	0	0	0	0	0	1	0	0	0	0	0	0					0		0	0
B 20181015 - 43	2018-10-15	1	2	0	0	0	0	0	1	0	1	0	0	0	0	0	0					0		0	0
B 20181015 - 44	2018-10-15	1	4	3	0	0	0	0	0	0	1	0	0	0	0	0	0					0		0	0
B 20181015 - 45	2018-10-15	1	1	1	0	0	0	0	0	0	0	0	0	0	0	0	0					0		0	0
B 20181015 - 46	2018-10-15	1	1	1	0	0	0	0	0	0	0	0	0	0	0	0	0					0		0	0
B 20181015 - 47	2018-10-15	1	2	2	0	0	0	0	0	0	0	0	0	0	0	0	0					0		0	0
B 20181015 - 48	2018-10-15	1	3	2	0	1	0	0	0	0	0	0	0	0	0	0	0					0		0	0
B 20181015 - 49	2018-10-15	1	1	0	0	0	0	0	0	0	1	0	0	0	0	0	0	8.58	Stone		Black	0		0	0
B 20181015 - 50	2018-10-15	1	1	0	0	1	0	0	0	0	0	0	0	0	0	0	0					0		0	0
B 20181015 - 51	2018-10-15	1	3	3	0	0	0	0	0	0	0	0	0	0	0	0	0					0		0	0
B 20181015 - 52	2018-10-15	1	0	0	0	0	0	0	0	0	0	0	0	0	0	0	0					0		0	0
B 20181015 - 53	2018-10-15	1	0	0	0	0	0	0	0	0	0	0	0	0	0	0	0					0		0	0
B 20181015 - 54	2018-10-15	1	1	0	0	0	0	0	0	0	0	0	0	1	0	0	0					0		0	0
B 20181015 - 55	2018-10-15	1	0	0	0	0	0	0	0	0	0	0	0	0	0	0	0					0		0	0
B 20181015 - 56	2018-10-15	1	5	5	0	0	0	0	0	0	0	0	0	0	0	0	0					0		0	0
B 20181015 - 57	2018-10-15	1	0	0	0	0	0	0	0	0	0	0	0	0	0	0	0					0		0	0
B 20181015 - 58	2018-10-15	1	0	0	0	0	0	0	0	0	0	0	0	0	0	0	0					0		0	0
B 20181015 - 59	2018-10-15	1	14	12	0	0	0	0	0	0	2	0	0	0	0	0	0					0		0	0
B 20181015 - 60	2018-10-15	1	3	2	0	0	0	0	0	0	0	0	0	0	1	0	0					0		0	0
B 20181015 - 61	2018-10-15	1	1	1	0	0	0	0	0	0	0	0	0	0	0	0	0					0		0	0
B 20181015 - 62	2018-10-15	1	1	1	0	0	0	0	0	0	0	0	0	0	0	0	0					0		0	0
B 20181015 - 63	2018-10-15	1	0	0	0	0	0	0	0	0	0	0	0	0	0	0	0					0		0	0
B 20181015 - 64	2018-10-15	1	5	4	0	0	0	0	0	0	0	0	1	0	0	0	0	11.5	Glass		Translucid	0	1	0	1
B 20181015 - 65	2018-10-15	1	0	0	0	0	0	0	0	0	0	0	0	0	0	0	0					0		0	0
B 20181015 - 66	2018-10-15	1	0	0	0	0	0	0	0	0	0	0	0	0	0	0	0					0		0	0
B 20181015 - 67	2018-10-15	1	1	0	0	0	0	0	0	0	0	0	0	0	0	1	0					0		0	0
B 20181015 - 68	2018-10-15	1	7	5	0	0	0	0	0	0	1	0	0	0	0	1	0					0		0	0
B 20181015 - 69	2018-10-15	1	5	4	0	0	0	0	0	0	1	0	0	0	0	0	0					0		0	0
B 20181015 - 70	2018-10-15	1	9	6	0	0	0	0	0	0	3	0	0	0	0	0	0					0		0	0
B 20181015 - 71	2018-10-15	1	3	3	0	0	0	0	0	0	0	0	0	0	0	0	0					0		0	0
B 20181015 - 72	2018-10-15	1	0	0	0	0	0	0	0	0	0	0	0	0	0	0	0					0		0	0
B 20181015 - 73	2018-10-15	1	3	2	0	1	0	0	0	0	0	0	0	0	0	0	0					0		0	0
B 20181015 - 74	2018-10-15	1	1	0	0	1	0	0	0	0	0	0	0	0	0	0	0					0		0	0
B 20181015 - 75	2018-10-15	1	4	4	0	0	0	0	0	0	0	0	0	0	0	0	0					0		0	0
B 20181015 - 76	2018-10-15	1	0	0	0	0	0	0	0	0	0	0	0	0	0	0	0					0		0	0
B 20181015 - 77	2018-10-15	1	1	0	0	0	1	0	0	0	0	0	0	0	0	0	0					0		0	0
B 20181015 - 78	2018-10-15	1	1	0	0	0	0	0	0	0	1	0	0	0	0	0	0					0		0	0
B 20181015 - 79	2018-10-15	1	6	5	0	0	0	0	0	0	1	0	0	0	0	0	0					0		0	0
B 20181015 - 80	2018-10-15	1	2	0	0	0	1	0	0	0	0	0	1	0	0	0	0	11.77	Processed wood		Brown	0	1	0	1
B 20181015 - 81	2018-10-15	1	0	0	0	0	0	0	0	0	0	0	0	0	0	0	0					0		0	0
B 20181015 - 82	2018-10-15	1	0	0	0	0	0	0	0	0	0	0	0	0	0	0	0					0		0	0
B 20181015 - 83	2018-10-15	1	7	6	0	0	0	0	0	0	0	0	0	0	0	0	1					0		0	0
B 20181015 - 84	2018-10-15	1	0	0	0	0	0	0	0	0	0	0	0	0	0	0	0					0		0	0
B 20181015 - 85	2018-10-15	1	2	2	0	0	0	0	0	0	0	0	0	0	0	0	0					0		0	0
B 20181015 - 86	2018-10-15	1	1	0	0	1	0	0	0	0	0	0	0	0	0	0	0					0		0	0
B 20181015 - 87	2018-10-15	1	1	0	0	1	0	0	0	0	0	0	0	0	0	0	0					0		0	0
B 20181015 - 88	2018-10-15	1	1	0	0	1	0	0	0	0	0	0	0	0	0	0	0					0		0	0
B 20181015 - 89	2018-10-15	1	9	3	0	0	0	0	1	0	5	0	0	0	0	0	0					0		0	0
B 20181015 - 90	2018-10-15	1	0	0	0	0	0	0	0	0	0	0	0	0	0	0	0					0		0	0
B 20181015 - 91	2018-10-15	1	0	0	0	0	0	0	0	0	0	0	0	0	0	0	0					0		0	0
B 20181015 - 92	2018-10-15	1	0	0	0	0	0	0	0	0	0	0	0	0	0	0	0					0		0	0
B 20181015 - 93	2018-10-15	1	0	0	0	0	0	0	0	0	0	0	0	0	0	0	0					0		0	0
B 20181015 - 94	2018-10-15	1	5	4	0	0	0	0	1	0	0	0	0	0	0	0	0					0		0	0
B 20181015 - 95	2018-10-15	1	3	0	0	0	0	0	0	0	3	0	0	0	0	0	0					0		0	0
B 20181015 - 96	2018-10-15	1	0	0	0	0	0	0	0	0	0	0	0	0	0	0	0					0		0	0
B 20181015 - 97	2018-10-15	1	0	0	0	0	0	0	0	0	0	0	0	0	0	0	0					0		0	0
B 20181015 - 98	2018-10-15	1	3	2	0	0	0	0	0	0	0	0	0	0	0	0	1					0		0	0
B 20181015 - 99	2018-10-15	1	2	2	0	0	0	0	0	0	0	0	0	0	0	0	0					0		0	0
B 20181015 - 100	2018-10-15	1	3	2	0	0	0	0	0	0	0	0	0	0	0	0	1					0		0	0
B 20181015 - 101	2018-10-15	1	4	3	0	0	0	0	0	0	0	0	0	0	0	0	1					0		0	0
B 20181015 - 102	2018-10-15	1	4	4	0	0	0	0	0	0	0	0	0	0	0	0	0					0		0	0
B 20181015 - 103	2018-10-15	1	0	0	0	0	0	0	0	0	0	0	0	0	0	0	0					0		0	0
B 20181015 - 104	2018-10-15	1	0	0	0	0	0	0	0	0	0	0	0	0	0	0	0					0		0	0
B 20181015 - 105	2018-10-15	1	1	0	0	0	1	0	0	0	0	0	0	0	0	0	0					0		0	0
B 20181015 - 106	2018-10-15	1	1	0	0	0	0	0	0	0	0	0	1	0	0	0	0	7.7	Glass		Translucid	0	1	0	1
B 20181015 - 107	2018-10-15	1	3	2	0	0	1	0	0	0	0	0	0	0	0	0	0					0		0	0
B 20181015 - 108	2018-10-15	1	1	0	0	1	0	0	0	0	0	0	0	0	0	0	0					0		0	0
B 20181015 - 109	2018-10-15	1	1	0	0	0	0	0	0	0	0	0	0	1	0	0	0					0		0	0
B 20181015 - 110	2018-10-15	1	1	0	0	0	0	0	0	0	0	0	0	0	0	0	1					0		0	0
B 20181015 - 111	2018-10-15	1	2	1	0	0	0	0	0	0	0	1	0	0	0	0	0	7.69	Plastic	Sheetlike	Translucid	0		1	1
B 20181015 - 112	2018-10-15	1	6	1	0	0	0	0	0	0	4	1	0	0	0	0	0	18.57	Plastic	Threadlike	Violet	0		1	1
B 20181015 - 113	2018-10-15	1	2	1	0	0	0	0	0	0	0	1	0	0	0	0	0	29.64	Plastic	Threadlike	Violet	0		1	1
B 20181015 - 114	2018-10-15	1	0	0	0	0	0	0	0	0	0	0	0	0	0	0	0					0		0	0
B 20181015 - 115	2018-10-15	1	0	0	0	0	0	0	0	0	0	0	0	0	0	0	0					0		0	0
B 20181015 - 116	2018-10-15	1	0	0	0	0	0	0	0	0	0	0	0	0	0	0	0					0		0	0
B 20181015 - 117	2018-10-15	1	4	3	0	0	0	0	0	0	0	0	0	0	0	0	1					0		0	0
B 20181015 - 118	2018-10-15	1	1	0	0	0	0	0	0	0	1	0	0	0	0	0	0					0		0	0
B 20181015 - 119	2018-10-15	1	0	0	0	0	0	0	0	0	0	0	0	0	0	0	0					0		0	0
B 20181015 - 120	2018-10-15	1	0	0	0	0	0	0	0	0	0	0	0	0	0	0	0					0		0	0
B 20181015 - 121	2018-10-15	1	4	4	0	0	0	0	0	0	0	0	0	0	0	0	0	5.9	Stone		Brown	0		0	0
B 20181015 - 122	2018-10-15	1	0	0	0	0	0	0	0	0	0	0	0	0	0	0	0					0		0	0
B 20181015 - 123	2018-10-15	1	0	0	0	0	0	0	0	0	0	0	0	0	0	0	0					0		0	0
B 20181015 - 124	2018-10-15	1	0	0	0	0	0	0	0	0	0	0	0	0	0	0	0					0		0	0
B 20181015 - 125	2018-10-15	1	5	3	0	0	1	0	0	0	1	0	0	0	0	0	0					0		0	0
B 20181015 - 126	2018-10-15	1	1	0	0	0	1	0	0	0	0	0	0	0	0	0	0					0		0	0
B 20181015 - 127	2018-10-15	1	1	0	0	0	0	0	1	0	0	0	0	0	0	0	0					0		0	0
B 20181015 - 128	2018-10-15	1	2	2	0	0	0	0	0	0	0	0	0	0	0	0	0					0		0	0
B 20181015 - 129	2018-10-15	1	0	0	0	0	0	0	0	0	0	0	0	0	0	0	0					0		0	0
B 20181015 - 130	2018-10-15	1	0	0	0	0	0	0	0	0	0	0	0	0	0	0	0					0		0	0
B 20181015 - 131	2018-10-15	1	1	0	0	0	0	0	0	0	0	0	0	0	1	0	0					0		0	0
B 20181015 - 132	2018-10-15	1	5	5	0	0	0	0	0	0	0	0	0	0	0	0	0					0		0	0
B 20181015 - 133	2018-10-15	1	0	0	0	0	0	0	0	0	0	0	0	0	0	0	0					0		0	0
B 20181015 - 134	2018-10-15	1	0	0	0	0	0	0	0	0	0	0	0	0	0	0	0					0		0	0
B 20181015 - 135	2018-10-15	1	0	0	0	0	0	0	0	0	0	0	0	0	0	0	0					0		0	0
B 20181015 - 136	2018-10-15	1	7	7	0	0	0	0	0	0	0	0	0	0	0	0	0					0		0	0
B 20181015 - 137	2018-10-15	1	1	0	0	0	0	0	0	0	0	0	1	0	0	0	0	6.2	Metal		Silver	0	1	0	1
B 20181015 - 138	2018-10-15	1	2	0	0	0	0	0	0	0	2	0	0	0	0	0	0					0		0	0
B 20181121 - 01	2018-11-21	2	8	4	0	1	0	0	0	0	3	0	0	0	0	0	0					0		0	0
B 20181121 - 02	2018-11-21	2	11	11	0	0	0	0	0	0	0	0	0	0	0	0	0					0		0	0
B 20181121 - 03	2018-11-21	2	1	1	0	0	0	0	0	0	0	0	0	0	0	0	0					0		0	0
B 20181121 - 04	2018-11-21	2	1	0	0	0	0	0	0	0	0	0	0	0	0	0	1					0		0	0
B 20181121 - 05	2018-11-21	2	1	0	0	0	0	0	1	0	0	0	0	0	0	0	0					0		0	0
B 20181121 - 06	2018-11-21	2	8	5	0	0	1	0	0	0	0	0	0	0	0	0	2					0		0	0
B 20181121 - 07	2018-11-21	2	0	0	0	0	0	0	0	0	0	0	0	0	0	0	0					0		0	0
B 20181121 - 08	2018-11-21	2	1	0	0	1	0	0	0	0	0	0	0	0	0	0	0					0		0	0
B 20181121 - 09	2018-11-21	2	2	2	0	0	0	0	0	0	0	0	0	0	0	0	0					0		0	0
B 20181121 - 10	2018-11-21	2	0	0	0	0	0	0	0	0	0	0	0	0	0	0	0					0		0	0
B 20181121 - 11	2018-11-21	2	3	3	0	0	0	0	0	0	0	0	0	0	0	0	0					0		0	0
B 20181121 - 12	2018-11-21	2	7	6	0	0	0	0	1	0	0	0	0	0	0	0	0					0		0	0
B 20181121 - 13	2018-11-21	2	1	0	0	1	0	0	0	0	0	0	0	0	0	0	0					0		0	0
B 20181121 - 14	2018-11-21	2	6	5	0	1	0	0	0	0	0	0	0	0	0	0	0					0		0	0
B 20181121 - 15	2018-11-21	2	0	0	0	0	0	0	0	0	0	0	0	0	0	0	0					0		0	0
B 20181121 - 16	2018-11-21	2	10	7	0	0	1	0	0	0	2	0	0	0	0	0	0					0		0	0
B 20181121 - 17	2018-11-21	2	2	1	0	1	0	0	0	0	0	0	0	0	0	0	0					0		0	0
B 20181121 - 18	2018-11-21	2	6	4	0	0	0	1	0	0	1	0	0	0	0	0	0					0		0	0
B 20181121 - 19	2018-11-21	2	2	0	0	0	0	0	0	0	2	0	0	0	0	0	0					0		0	0
B 20181121 - 20	2018-11-21	2	0	0	0	0	0	0	0	0	0	0	0	0	0	0	0	9.26/12.41	Natural wood		Brown	0		0	0
B 20181121 - 21	2018-11-21	2	7	7	0	0	0	0	0	0	0	0	0	0	0	0	0					0		0	0
B 20181121 - 22	2018-11-21	2	5	5	0	0	0	0	0	0	0	0	0	0	0	0	0					0		0	0
B 20181121 - 23	2018-11-21	2	1	1	0	0	0	0	0	0	0	0	0	0	0	0	0					0		0	0
B 20181121 - 24	2018-11-21	2	1	1	0	0	0	0	0	0	0	0	0	0	0	0	0					0		0	0
B 20181121 - 25	2018-11-21	2	1	0	0	0	1	0	0	0	0	0	0	0	0	0	0					0		0	0
B 20181121 - 26	2018-11-21	2	3	3	0	0	0	0	0	0	0	0	0	0	0	0	0					0		0	0
B 20181121 - 27	2018-11-21	2	3	2	0	0	0	0	0	0	0	1	0	0	0	0	0	29.6	Plastic	Threadlike	White	0		1	1
B 20181121 - 28	2018-11-21	2	1	0	0	0	1	0	0	0	0	0	0	0	0	0	0					0		0	0
B 20181121 - 29	2018-11-21	2	8	6	0	0	0	1	0	0	0	1	0	0	0	0	0	5.12	Plastic	Fragment	Red	0		1	1
B 20181121 - 30	2018-11-21	2	9	9	0	0	0	0	0	0	0	0	0	0	0	0	0					0		0	0
B 20181121 - 31	2018-11-21	2	3	3	0	0	0	0	0	0	0	0	0	0	0	0	0					0		0	0
B 20181121 - 32	2018-11-21	2	2	2	0	0	0	0	0	0	0	0	0	0	0	0	0					0		0	0
B 20181121 - 33	2018-11-21	2	5	4	0	0	0	0	0	0	0	0	1	0	0	0	0	11.53/1.97	Stone/Fibers		Brown/Red	0	1	0	1
B 20181121 - 34	2018-11-21	2	1	1	0	0	0	0	0	0	0	0	0	0	0	0	0					0		0	0
B 20181121 - 35	2018-11-21	2	6	6	0	0	0	0	0	0	0	0	0	0	0	0	0					0		0	0
B 20181121 - 36	2018-11-21	2	1	0	0	0	1	0	0	0	0	0	0	0	0	0	0	6.64	Natural wood		Brown	0		0	0
B 20181121 - 37	2018-11-21	2	10	7	0	0	0	0	0	0	3	0	0	0	0	0	0					0		0	0
B 20181121 - 38	2018-11-21	2	0	0	0	0	0	0	0	0	0	0	0	0	0	0	0					0		0	0
B 20181121 - 39	2018-11-21	2	2	2	0	0	0	0	0	0	0	0	0	0	0	0	0	26.91	Natural wood		Brown	0		0	0
B 20181121 - 40	2018-11-21	2	5	4	0	0	0	1	0	0	0	0	0	0	0	0	0					0		0	0
B 20181121 - 41	2018-11-21	2	5	4	0	0	0	0	0	0	0	1	0	0	0	0	0	14.97	Plastic	Threadlike	White	0		1	1
B 20181121 - 42	2018-11-21	2	0	0	0	0	0	0	0	0	0	0	0	0	0	0	0					0		0	0
B 20181121 - 43	2018-11-21	2	1	1	0	0	0	0	0	0	0	0	0	0	0	0	0					0		0	0
B 20181121 - 44	2018-11-21	2	2	2	0	0	0	0	0	0	0	0	0	0	0	0	0					0		0	0
B 20181121 - 45	2018-11-21	2	1	0	0	0	0	0	0	0	1	0	0	0	0	0	0					0		0	0
B 20181121 - 46	2018-11-21	2	1	0	0	0	0	0	0	0	1	0	0	0	0	0	0					0		0	0
B 20181121 - 47	2018-11-21	2	0	0	0	0	0	0	0	0	0	0	0	0	0	0	0					0		0	0
B 20181121 - 48	2018-11-21	2	9	9	0	0	0	0	0	0	0	0	0	0	0	0	0	15.37	Algae		Brown	0		0	0
B 20181121 - 49	2018-11-21	2	0	0	0	0	0	0	0	0	0	0	0	0	0	0	0					0		0	0
B 20181121 - 50	2018-11-21	2	0	0	0	0	0	0	0	0	0	0	0	0	0	0	0					0		0	0
B 20181121 - 51	2018-11-21	2	3	3	0	0	0	0	0	0	0	0	0	0	0	0	0					0		0	0
B 20181121 - 52	2018-11-21	2	3	2	0	1	0	0	0	0	0	0	0	0	0	0	0					0		0	0
B 20181121 - 53	2018-11-21	2	5	5	0	0	0	0	0	0	0	0	0	0	0	0	0	10.99	Natural wood		Brown	0		0	0
B 20181121 - 54	2018-11-21	2	1	0	0	0	0	0	1	0	0	0	0	0	0	0	0					0		0	0
B 20181121 - 55	2018-11-21	2	2	2	0	0	0	0	0	0	0	0	0	0	0	0	0					0		0	0
B 20181121 - 56	2018-11-21	2	3	2	0	1	0	0	0	0	0	0	0	0	0	0	0					0		0	0
B 20181121 - 57	2018-11-21	2	2	1	0	0	0	0	0	0	1	0	0	0	0	0	0					0		0	0
B 20181121 - 58	2018-11-21	2	5	3	0	1	0	0	0	0	1	0	0	0	0	0	0					0		0	0
B 20181121 - 59	2018-11-21	2	4	4	0	0	0	0	0	0	0	0	0	0	0	0	0					0		0	0
B 20181121 - 60	2018-11-21	2	8	8	0	0	0	0	0	0	0	0	0	0	0	0	0	2.5	Stone		Grey	0		0	0
B 20181121 - 61	2018-11-21	2	1		0	0	0	0	0	0	1	0	0	0	0	0	0					0		0	0
B 20181121 - 62	2018-11-21	2	1	0	0	0	0	0	0	0	1	0	0	0	0	0	0					0		0	0
B 20181121 - 63	2018-11-21	2	3	2	0	0	0	0	0	0	1	0	0	0	0	0	0					0		0	0
B 20181121 - 64	2018-11-21	2	2	1	0	0	0	0	0	0	0	1	0	0	0	0	0	5.25	Plastic	Sheetlike	Blue	0		1	1
B 20181121 - 65	2018-11-21	2	1	0	0	0	0	0	0	0	0	1	0	0	0	0	0	3.71	Plastic	Sheetlike	Red	0		1	1
B 20181121 - 66	2018-11-21	2	0	0	0	0	0	0	0	0	0	0	0	0	0	0	0					0		0	0
B 20181121 - 67	2018-11-21	2	2	2	0	0	0	0	0	0	0	0	0	0	0	0	0					0		0	0
B 20181121 - 68	2018-11-21	2	6	6	0	0	0	0	0	0	0	0	0	0	0	0	0					0		0	0
B 20181121 - 69	2018-11-21	2	6	5	0	0	0	0	0	0	1	0	0	0	0	0	0					0		0	0
B 20181121 - 70	2018-11-21	2	4	0	0	0	0	0	0	0	0	3	1	0	0	0	0	38.42/1.42/3.53/7.61	Fibers/Plastic	Sheetlike	Red	0	1	1	1
B 20181121 - 71	2018-11-21	2	3	2	0	0	0	0	0	0	1	0	0	0	0	0	0					0		0	0
B 20181121 - 72	2018-11-21	2	4	2	0	0	0	1	0	0	1	0	0	0	0	0	0					0		0	0
B 20181121 - 73	2018-11-21	2	5	5	0	0	0	0	0	0	0	0	0	0	0	0	0					0		0	0
B 20181121 - 74	2018-11-21	2	4	4	0	0	0	0	0	0	0	0	0	0	0	0	0					0		0	0
B 20181121 - 75	2018-11-21	2	6	5	0	0	0	0	0	0	1	0	0	0	0	0	0					0		0	0
B 20181121 - 76	2018-11-21	2	1	0	0	0	0	0	0	0	0	0	0	0	0	1	0					0		0	0
B 20181121 - 77	2018-11-21	2	2	1	0	1	0	0	0	0	0	0	0	0	0	0	0					0		0	0
B 20181121 - 78	2018-11-21	2	2	2	0	0	0	0	0	0	0	0	0	0	0	0	0					0		0	0
B 20181121 - 79	2018-11-21	2	9	2	0	0	0	0	0	0	0	7	0	0	0	0	0	5.49/6.6/9.97/6.39/7.3/4.60/3.49	Plastic	Sheetlike / Threadlike / Fragment	Yellow / Green / Red	0		1	1
B 20181121 - 80	2018-11-21	2	4	3	0	0	0	0	0	0	0	1	0	0	0	0	0	24.59	Plastic	Sheetlike	Translucid	0		1	1
B 20181121 - 81	2018-11-21	2	0	0	0	0	0	0	0	0	0	0	0	0	0	0	0					0		0	0
B 20181121 - 82	2018-11-21	2	1	0	0	0	1	0	0	0	0	0	0	0	0	0	0					0		0	0
B 20181121 - 83	2018-11-21	2	1	0	0	0	1	0	0	0	0	0	0	0	0	0	0					0		0	0
B 20181121 - 84	2018-11-21	2	0	0	0	0	0	0	0	0	0	0	0	0	0	0	0					0		0	0
B 20181121 - 85	2018-11-21	2	1	0	0	0	1	0	0	0	0	0	0	0	0	0	0					0		0	0
B 20181121 - 86	2018-11-21	2	5	4	0	1	0	0	0	0	0	0	0	0	0	0	0					0		0	0
B 20181121 - 87	2018-11-21	2	1	1	0	0	0	0	0	0	0	0	0	0	0	0	0					0		0	0
B 20181121 - 88	2018-11-21	2	1	1	0	0	0	0	0	0	0	0	0	0	0	0	0					0		0	0
B 20181121 - 89	2018-11-21	2	3	2	0	0	0	0	0	0	0	0	1	0	0	0	0	16	Pavement		Yellow	0	1	0	1
B 20181121 - 90	2018-11-21	2	1	0	0	0	0	0	0	0	1	0	0	0	0	0	0					0		0	0
B 20181121 - 91	2018-11-21	2	1	0	0	0	0	0	1	0	0	0	0	0	0	0	0					0		0	0
B 20181121 - 92	2018-11-21	2	0	0	0	0	0	0	0	0	0	0	0	0	0	0	0					0		0	0
B 20181121 - 93	2018-11-21	2	0	0	0	0	0	0	0	0	0	0	0	0	0	0	0					0		0	0
B 20181121 - 94	2018-11-21	2	0	0	0	0	0	0	0	0	0	0	0	0	0	0	0					0		0	0
B 20181121 - 95	2018-11-21	2	0	0	0	0	0	0	0	0	0	0	0	0	0	0	0					0		0	0
B 20181121 - 96	2018-11-21	2	0	0	0	0	0	0	0	0	0	0	0	0	0	0	0					0		0	0
B 20181121 - 97	2018-11-21	2	2	2	0	0	0	0	0	0	0	0	0	0	0	0	0					0		0	0
B 20181121 - 98	2018-11-21	2	1	0	0	0	0	0	0	0	1	0	0	0	0	0	0					0		0	0
B 20181121 - 99	2018-11-21	2	2	2	0	0	0	0	0	0	0	0	0	0	0	0	0					0		0	0
B 20181121 - 100	2018-11-21	2	2	2	0	0	0	0	0	0	0	0	0	0	0	0	0					0		0	0
B 20181121 - 101	2018-11-21	2	4	4	0	0	0	0	0	0	0	0	0	0	0	0	0					0		0	0
B 20181121 - 102	2018-11-21	2	7	4	0	0	0	0	0	0	1	2	0	0	0	0	0	30.67/59	Plastic	Threadlike	Black	0		1	1
B 20181121 - 103	2018-11-21	2	1	0	0	0	0	0	0	0	1	0	0	0	0	0	0					0		0	0
B 20181121 - 104	2018-11-21	2	0	0	0	0	0	0	0	0	0	0	0	0	0	0	0					0		0	0
B 20181121 - 105	2018-11-21	2	0	0	0	0	0	0	0	0	0	0	0	0	0	0	0					0		0	0
B 20181121 - 106	2018-11-21	2	3	1	0	0	0	0	0	0	0	1	0	1	0	0	0	12.85	Plastic	Threadlike	Translucid	0		1	1
B 20181121 - 107	2018-11-21	2	3	2	0	0	1	0	0	0	0	0	0	0	0	0	0					0		0	0
B 20181121 - 108	2018-11-21	2	4	1	0	0	0	0	0	0	3	0	0	0	0	0	0					0		0	0
B 20181121 - 109	2018-11-21	2	1	0	0	0	0	0	0	0	1	0	0	0	0	0	0					0		0	0
B 20181121 - 110	2018-11-21	2	4	3	0	0	0	0	0	0	1	0	0	0	0	0	0					0		0	0
B 20181121 - 111	2018-11-21	2	4	2	0	0	0	0	0	0	2	0	0	0	0	0	0					0		0	0
B 20181121 - 112	2018-11-21	2	5	5	0	0	0	0	0	0	0	0	0	0	0	0	0					0		0	0
B 20181121 - 113	2018-11-21	2	1	0	0	1	0	0	0	0	0	0	0	0	0	0	0					0		0	0
B 20181121 - 114	2018-11-21	2	6	6	0	0	0	0	0	0	0	0	0	0	0	0	0					0		0	0
B 20181121 - 115	2018-11-21	2	0	0	0	0	0	0	0	0	0	0	0	0	0	0	0					0		0	0
B 20181121 - 116	2018-11-21	2	0	0	0	0	0	0	0	0	0	0	0	0	0	0	0					0		0	0
B 20181121 - 117	2018-11-21	2	1	0	0	0	1	0	0	0	0	0	0	0	0	0	0	35.51	Natural wood			0		0	0
B 20181121 - 118	2018-11-21	2	19	19	0	0	0	0	0	0	0	0	0	0	0	0	0					0		0	0
B 20181121 - 119	2018-11-21	2	2	0	0	0	0	0	0	0	1	1	0	0	0	0	0	7.49	Plastic	Sheetlike	Blue	0		1	1
B 20181121 - 120	2018-11-21	2	0	0	0	0	0	0	0	0	0	0	0	0	0	0	0					0		0	0
B 20181121 - 121	2018-11-21	2	1	0	0	0	1	0	0	0	0	0	0	0	0	0	0					0		0	0
B 20181121 - 122	2018-11-21	2	0	0	0	0	0	0	0	0	0	0	0	0	0	0	0					0		0	0
B 20181121 - 123	2018-11-21	2	1	1	0	0	0	0	0	0	0	0	0	0	0	0	0					0		0	0
B 20181121 - 124	2018-11-21	2	4	3	0	1	0	0	0	0	0	0	0	0	0	0	0					0		0	0
B 20181121 - 125	2018-11-21	2	1	0	0	1	0	0	0	0	0	0	0	0	0	0	0					0		0	0
B 20181121 - 126	2018-11-21	2	0	0	0	0	0	0	0	0	0	0	0	0	0	0	0					0		0	0
B 20181121 - 127	2018-11-21	2	1	0	0	0	0	0	0	0	1	0	0	0	0	0	0					0		0	0
B 20181121 - 128	2018-11-21	2	2	2	0	0	0	0	0	0	0	0	0	0	0	0	0					0		0	0
B 20181121 - 129	2018-11-21	2	0	0	0	0	0	0	0	0	0	0	0	0	0	0	0					0		0	0
B 20181121 - 130	2018-11-21	2	4	4	0	0	0	0	0	0	0	0	0	0	0	0	0					0		0	0
B 20181121 - 131	2018-11-21	2	2	2	0	0	0	0	0	0	0	0	0	0	0	0	0					0		0	0
B 20181121 - 132	2018-11-21	2	1	1	0	0	0	0	0	0	0	0	0	0	0	0	0					0		0	0
B 20181121 - 133	2018-11-21	2	0	0	0	0	0	0	0	0	0	0	0	0	0	0	0					0		0	0
B 20181121 - 134	2018-11-21	2	6	5	0	0	0	0	0	0	1	0	0	0	0	0	0					0		0	0
B 20181121 - 135	2018-11-21	2	0	0	0	0	0	0	0	0	0	0	0	0	0	0	0					0		0	0
B 20181121 - 136	2018-11-21	2	0	0	0	0	0	0	0	0	0	0	0	0	0	0	0					0		0	0
B 20181121 - 137	2018-11-21	2	0	0	0	0	0	0	0	0	0	0	0	0	0	0	0					0		0	0
B 20181121 - 138	2018-11-21	2	0	0	0	0	0	0	0	0	0	0	0	0	0	0	0					0		0	0
B 20181219 - 01	2018-12-19	3	3	3	0	0	0	0	0	0	0	0	0	0	0	0	0					0		0	0
B 20181219 - 02	2018-12-19	3	4	4	0	0	0	0	0	0	0	0	0	0	0	0	0					0		0	0
B 20181219 - 03	2018-12-19	3	1	0	0	0	0	0	0	0	0	0	0	0	0	1	0					0		0	0
B 20181219 - 04	2018-12-19	3	2	1	0	0	1	0	0	0	0	0	0	0	0	0	0					0		0	0
B 20181219 - 05	2018-12-19	3	1	1	0	0	0	0	0	0	0	0	0	0	0	0	0					0		0	0
B 20181219 - 06	2018-12-19	3	5	5	0	0	0	0	0	0	0	0	0	0	0	0	0					0		0	0
B 20181219 - 07	2018-12-19	3	1	0	0	0	0	0	0	0	1	0	0	0	0	0	0					0		0	0
B 20181219 - 08	2018-12-19	3	5	5	0	0	0	0	0	0	0	0	0	0	0	0	0					0		0	0
B 20181219 - 09	2018-12-19	3	8	8	0	0	0	0	0	0	0	0	0	0	0	0	0					0		0	0
B 20181219 - 10	2018-12-19	3	1	1	0	0	0	0	0	0	0	0	0	0	0	0	0					0		0	0
B 20181219 - 11	2018-12-19	3	0	0	0	0	0	0	0	0	0	0	0	0	0	0	0					0		0	0
B 20181219 - 12	2018-12-19	3	3	2	0	0	0	0	0	0	1	0	0	0	0	0	0	15.69/5.3	Natural wood		Brown	0		0	0
B 20181219 - 13	2018-12-19	3	2	2	0	0	0	0	0	0	0	0	0	0	0	0	0					0		0	0
B 20181219 - 14	2018-12-19	3	1	1	0	0	0	0	0	0	0	0	0	0	0	0	0					0		0	0
B 20181219 - 15	2018-12-19	3	6	5	0	0	0	0	0	0	1	0	0	0	0	0	0					0		0	0
B 20181219 - 16	2018-12-19	3	4	4	0	0	0	0	0	0	0	0	0	0	0	0	0					0		0	0
B 20181219 - 17	2018-12-19	3	2	2	0	0	0	0	0	0	0	0	0	0	0	0	0					0		0	0
B 20181219 - 18	2018-12-19	3	7	6	0	1	0	0	0	0	0	0	0	0	0	0	0					0		0	0
B 20181219 - 19	2018-12-19	3	3	3	0	0	0	0	0	0	0	0	0	0	0	0	0					0		0	0
B 20181219 - 20	2018-12-19	3	4	3	0	0	0	0	0	0	1	0	0	0	0	0	0					0		0	0
B 20181219 - 21	2018-12-19	3	4	4	0	0	0	0	0	0	0	0	0	0	0	0	0					0		0	0
B 20181219 - 22	2018-12-19	3	5	4	0	0	0	0	0	0	1	0	0	0	0	0	0					0		0	0
B 20181219 - 23	2018-12-19	3	1	1	0	0	0	0	0	0	0	0	0	0	0	0	0					0		0	0
B 20181219 - 24	2018-12-19	3	3	2	0	0	1	0	0	0	0	0	0	0	0	0	0					0		0	0
B 20181219 - 25	2018-12-19	3	2	0	0	0	0	0	0	0	1	1	0	0	0	0	0	1.4	Plastic	Sheetlike	Yellow	0		1	1
B 20181219 - 26	2018-12-19	3	8	7	0	0	0	0	0	0	1	0	0	0	0	0	0					0		0	0
B 20181219 - 27	2018-12-19	3	8	7	0	0	0	0	0	0	0	0	0	1	0	0	0					0		0	0
B 20181219 - 28	2018-12-19	3	5	5	0	0	0	0	0	0	0	0	0	0	0	0	0					0		0	0
B 20181219 - 29	2018-12-19	3	6	6	0	0	0	0	0	0	0	0	0	0	0	0	0					0		0	0
B 20181219 - 30	2018-12-19	3	6	5	0	0	0	0	0	0	1	0	0	0	0	0	0					0		0	0
B 20181219 - 31	2018-12-19	3	1	1	0	0	0	0	0	0	0	0	0	0	0	0	0					0		0	0
B 20181219 - 32	2018-12-19	3	3	2	0	0	0	0	0	0	0	0	0	0	0	1	0					0		0	0
B 20181219 - 33	2018-12-19	3	2	2	0	0	0	0	0	0	0	0	0	0	0	0	0					0		0	0
B 20181219 - 34	2018-12-19	3	2	1	0	0	1	0	0	0	0	0	0	0	0	0	0					0		0	0
B 20181219 - 35	2018-12-19	3	4	3	0	0	0	0	0	0	1	0	0	0	0	0	0					0		0	0
B 20181219 - 36	2018-12-19	3	5	5	0	0	0	0	0	0	0	0	0	0	0	0	0					0		0	0
B 20181219 - 37	2018-12-19	3	0	0	0	0	0	0	0	0	0	0	0	0	0	0	0					0		0	0
B 20181219 - 38	2018-12-19	3	10	9	0	0	0	0	0	0	1	0	0	0	0	0	0					0		0	0
B 20181219 - 39	2018-12-19	3	3	3	0	0	0	0	0	0	0	0	0	0	0	0	0					0		0	0
B 20181219 - 40	2018-12-19	3	7	5	0	1	1	0	0	0	0	0	0	0	0	0	0					0		0	0
B 20181219 - 41	2018-12-19	3	6	5	0	0	1	0	0	0	0	0	0	0	0	0	0					0		0	0
B 20181219 - 42	2018-12-19	3	0	0	0	0	0	0	0	0	0	0	0	0	0	0	0					0		0	0
B 20181219 - 43	2018-12-19	3	6	3	0	0	0	0	0	0	2	0	1	0	0	0	0	4.82	Glass		Translucid	0		0	1
B 20181219 - 44	2018-12-19	3	2	1	0	0	0	1	0	0	0	0	0	0	0	0	0					0		0	0
B 20181219 - 45	2018-12-19	3	0	0	0	0	0	0	0	0	0	0	0	0	0	0	0					0		0	0
B 20181219 - 46	2018-12-19	3	8	5	0	1	0	0	0	0	2	0	0	0	0	0	0					0		0	0
B 20181219 - 47	2018-12-19	3	0	0	0	0	0	0	0	0	0	0	0	0	0	0	0					0		0	0
B 20181219 - 48	2018-12-19	3	0	0	0	0	0	0	0	0	0	0	0	0	0	0	0					0		0	0
B 20181219 - 49	2018-12-19	3	0	0	0	0	0	0	0	0	0	0	0	0	0	0	0					0		0	0
B 20181219 - 50	2018-12-19	3	0	0	0	0	0	0	0	0	0	0	0	0	0	0	0					0		0	0
B 20181219 - 51	2018-12-19	3	0	0	0	0	0	0	0	0	0	0	0	0	0	0	0					0		0	0
B 20181219 - 52	2018-12-19	3	10	10	0	0	0	0	0	0	0	0	0	0	0	0	0					0		0	0
B 20181219 - 53	2018-12-19	3	2	1	0	0	1	0	0	0	0	0	0	0	0	0	0					0		0	0
B 20181219 - 54	2018-12-19	3	2	0	0	1	1	0	0	0	0	0	0	0	0	0	0					0		0	0
B 20181219 - 55	2018-12-19	3	0	0	0	0	0	0	0	0	0	0	0	0	0	0	0					0		0	0
B 20181219 - 56	2018-12-19	3	5	5	0	0	0	0	0	0	0	0	0	0	0	0	0					0		0	0
B 20181219 - 57	2018-12-19	3	7	7	0	0	0	0	0	0	0	0	0	0	0	0	0					0		0	0
B 20181219 - 58	2018-12-19	3	3	2	0	1	0	0	0	0	0	0	0	0	0	0	0					0		0	0
B 20181219 - 59	2018-12-19	3	0	0	0	0	0	0	0	0	0	0	0	0	0	0	0					0		0	0
B 20181219 - 60	2018-12-19	3	1	1	0	0	0	0	0	0	0	0	0	0	0	0	0					0		0	0
B 20181219 - 61	2018-12-19	3	0	0	0	0	0	0	0	0	0	0	0	0	0	0	0					0		0	0
B 20181219 - 62	2018-12-19	3	0	0	0	0	0	0	0	0	0	0	0	0	0	0	0					0		0	0
B 20181219 - 63	2018-12-19	3	4	4	0	0	0	0	0	0	0	0	0	0	0	0	0					0		0	0
B 20181219 - 64	2018-12-19	3	4	4	0	0	0	0	0	0	0	0	0	0	0	0	0					0		0	0
B 20181219 - 65	2018-12-19	3	7	7	0	0	0	0	0	0	0	0	0	0	0	0	0					0		0	0
B 20181219 - 66	2018-12-19	3	1	0	0	0	0	0	0	0	0	1	0	0	0	0	0	3.76	Plastic	Threadlike	Yellow	0		1	1
B 20181219 - 67	2018-12-19	3	2	2	0	0	0	0	0	0	0	0	0	0	0	0	0					0		0	0
B 20181219 - 68	2018-12-19	3	3	2	0	0	0	0	0	0	1	0	0	0	0	0	0					0		0	0
B 20181219 - 69	2018-12-19	3	6	6	0	0	0	0	0	0	0	0	0	0	0	0	0					0		0	0
B 20181219 - 70	2018-12-19	3	9	5	0	0	1	0	0	0	0	3	0	0	0	0	0	14.4/8.48/8.43/3.67	Natural wood/Plastic	Sheetlike	Brown/Blue	0		1	1
B 20181219 - 71	2018-12-19	3	0	0	0	0	0	0	0	0	0	0	0	0	0	0	0					0		0	0
B 20181219 - 72	2018-12-19	3	1	1	0	0	0	0	0	0	0	0	0	0	0	0	0					0		0	0
B 20181219 - 73	2018-12-19	3	3	3	0	0	0	0	0	0	0	0	0	0	0	0	0					0		0	0
B 20181219 - 74	2018-12-19	3	2	0	0	0	0	0	0	0	0	1	0	0	0	1	0	13.73	Plastic	Threadlike	Translucid	0		1	1
B 20181219 - 75	2018-12-19	3	1	1	0	0	0	0	0	0	0	0	0	0	0	0	0					0		0	0
B 20181219 - 76	2018-12-19	3	1	1	0	0	0	0	0	0	0	0	0	0	0	0	0					0		0	0
B 20181219 - 77	2018-12-19	3	1	1	0	0	0	0	0	0	0	0	0	0	0	0	0					0		0	0
B 20181219 - 78	2018-12-19	3	5	4	0	0	0	0	0	0	1	0	0	0	0	0	0					0		0	0
B 20181219 - 79	2018-12-19	3	6	5	0	0	1	0	0	0	0	0	0	0	0	0	0					0		0	0
B 20181219 - 80	2018-12-19	3	2	2	0	0	0	0	0	0	0	0	0	0	0	0	0					0		0	0
B 20181219 - 81	2018-12-19	3	0	0	0	0	0	0	0	0	0	0	0	0	0	0	0					0		0	0
B 20181219 - 82	2018-12-19	3	1	1	0	0	0	0	0	0	0	0	0	0	0	0	0					0		0	0
B 20181219 - 83	2018-12-19	3	1	0	0	0	0	0	0	0	1	0	0	0	0	0	0					0		0	0
B 20181219 - 84	2018-12-19	3	3	3	0	0	0	0	0	0	0	0	0	0	0	0	0					0		0	0
B 20181219 - 85	2018-12-19	3	0	0	0	0	0	0	0	0	0	0	0	0	0	0	0					0		0	0
B 20181219 - 86	2018-12-19	3	1	1	0	0	0	0	0	0	0	0	0	0	0	0	0					0		0	0
B 20181219 - 87	2018-12-19	3	1	0	0	1	0	0	0	0	0	0	0	0	0	0	0					0		0	0
B 20181219 - 88	2018-12-19	3	1	1	0	0	0	0	0	0	0	0	0	0	0	0	0					0		0	0
B 20181219 - 89	2018-12-19	3	4	4	0	0	0	0	0	0	0	0	0	0	0	0	0					0		0	0
B 20181219 - 90	2018-12-19	3	1	0	0	0	1	0	0	0	0	0	0	0	0	0	0					0		0	0
B 20181219 - 91	2018-12-19	3	1	1	0	0	0	0	0	0	0	0	0	0	0	0	0					0		0	0
B 20181219 - 92	2018-12-19	3	6	5	0	0	1	0	0	0	0	0	0	0	0	0	0					0		0	0
B 20181219 - 93	2018-12-19	3	3	2	0	0	1	0	0	0	0	0	0	0	0	0	0					0		0	0
B 20181219 - 94	2018-12-19	3	0	0	0	0	0	0	0	0	0	0	0	0	0	0	0					0		0	0
B 20181219 - 95	2018-12-19	3	1	1	0	0	0	0	0	0	0	0	0	0	0	0	0					0		0	0
B 20190122 - 01	2019-01-22	4	2	2	0	0	0	0	0	0	0	0	0	0	0	0	0					0		0	0
B 20190122 - 02	2019-01-22	4	1	0	0	0	1	0	0	0	0	0	0	0	0	0	0					0		0	0
B 20190122 - 03	2019-01-22	4	1	0	0	0	0	0	0	0	0	1	0	0	0	0	0	3.94	Plastic	Fragment	Black	0		1	1
B 20190122 - 04	2019-01-22	4	0	0	0	0	0	0	0	0	0	0	0	0	0	0	0					0		0	0
B 20190122 - 05	2019-01-22	4	1	0	0	0	0	0	0	0	0	0	0	0	0	0	1					0		0	0
B 20190122 - 06	2019-01-22	4	3	3	0	0	0	0	0	0	0	0	0	0	0	0	0					0		0	0
B 20190122 - 07	2019-01-22	4	0	0	0	0	0	0	0	0	0	0	0	0	0	0	0					0		0	0
B 20190122 - 08	2019-01-22	4	1	0	0	0	0	0	0	0	0	0	1	0	0	0	0	17.9	Processed wood		Brown	0	1	0	1
B 20190122 - 09	2019-01-22	4	0	0	0	0	0	0	0	0	0	0	0	0	0	0	0					0		0	0
B 20190122 - 10	2019-01-22	4	0	0	0	0	0	0	0	0	0	0	0	0	0	0	0					0		0	0
B 20190122 - 11	2019-01-22	4	2	2	0	0	0	0	0	0	0	0	0	0	0	0	0					0		0	0
B 20190122 - 12	2019-01-22	4	0	0	0	0	0	0	0	0	0	0	0	0	0	0	0					0		0	0
B 20190122 - 13	2019-01-22	4	0	0	0	0	0	0	0	0	0	0	0	0	0	0	0					0		0	0
B 20190122 - 14	2019-01-22	4	1	1	0	0	0	0	0	0	0	0	0	0	0	0	0					0		0	0
B 20190122 - 15	2019-01-22	4	1	1	0	0	0	0	0	0	0	0	0	0	0	0	0					0		0	0
B 20190219 - 01	2019-02-19	5	6	4	0	0	0	0	0	0	1	0	1	0	0	0	0	10.41	Processed wood		Grey	0	1	0	1
B 20190219 - 02	2019-02-19	5	0	0	0	0	0	0	0	0	0	0	0	0	0	0	0					0		0	0
B 20190219 - 03	2019-02-19	5	3	2	0	0	0	0	0	0	0	0	0	0	0	0	1					0		0	0
B 20190219 - 04	2019-02-19	5	0	0	0	0	0	0	0	0	0	0	0	0	0	0	0					0		0	0
B 20190219 - 05	2019-02-19	5	2	1	0	1	0	0	0	0	0	0	0	0	0	0	0					0		0	0
B 20190219 - 06	2019-02-19	5	2	1	0	1	0	0	0	0	0	0	0	0	0	0	0					0		0	0
B 20190219 - 07	2019-02-19	5	1	1	0	0	0	0	0	0	0	0	0	0	0	0	0					0		0	0
B 20190219 - 08	2019-02-19	5	1	1	0	0	0	0	0	0	0	0	0	0	0	0	0					0		0	0
B 20190219 - 09	2019-02-19	5	2	0	0	0	0	0	0	0	2	0	0	0	0	0	0					0		0	0
B 20190219 - 10	2019-02-19	5	3	3	0	0	0	0	0	0	0	0	0	0	0	0	0					0		0	0
B 20190219 - 11	2019-02-19	5	0	0	0	0	0	0	0	0	0	0	0	0	0	0	0					0		0	0
B 20190722 - 01	2019-07-22	6	3	2	0	0	0	0	0	0	1	0	0	0	0	0	0					0		0	0
B 20190722 - 02	2019-07-22	6	1	0	0	0	0	0	0	0	0	1	0	0	0	0	0	137.81	Plastic	Threadlike	Translucid	0		1	1
B 20190722 - 03	2019-07-22	6	1	1	0	0	0	0	0	0	0	0	0	0	0	0	0					0		0	0
B 20190722 - 04	2019-07-22	6	3	1	0	0	1	0	0	0	0	0	0	0	0	1	0					0		0	0
B 20190722 - 05	2019-07-22	6	3	1	0	0	0	0	0	0	1	0	0	0	0	1	0					0		0	0
B 20190722 - 06	2019-07-22	6	1	0	0	0	1	0	0	0	0	0	0	0	0	0	0					0		0	0
B 20190722 - 07	2019-07-22	6	3	3	0	0	0	0	0	0	0	0	0	0	0	0	0					0		0	0
B 20190722 - 08	2019-07-22	6	3	0	0	1	1	0	0	0	1	0	0	0	0	0	0					0		0	0
B 20190722 - 09	2019-07-22	6	4	3	0	0	1	0	0	0	0	0	0	0	0	0	0					0		0	0
B 20190722 - 10	2019-07-22	6	0	0	0	0	0	0	0	0	0	0	0	0	0	0	0					0		0	0
B 20190722 - 11	2019-07-22	6	1	1	0	0	0	0	0	0	0	0	0	0	0	0	0					0		0	0
B 20190722 - 12	2019-07-22	6	1	0	0	0	0	0	1	0	0	0	0	0	0	0	0	9.05	Leaf		Opaque	0		0	0
B 20190722 - 13	2019-07-22	6	10	8	0	0	1	0	0	0	1	0	0	0	0	0	0					0		0	0
B 20190722 - 14	2019-07-22	6	1	1	0	0	0	0	0	0	0	0	0	0	0	0	0					0		0	0
B 20190722 - 15	2019-07-22	6	3	3	0	0	0	0	0	0	0	0	0	0	0	0	0					0		0	0
B 20190722 - 16	2019-07-22	6	0	0	0	0	0	0	0	0	0	0	0	0	0	0	0					0		0	0
B 20190722 - 17	2019-07-22	6	5	4	0	0	1	0	0	0	0	0	0	0	0	0	0					0		0	0
B 20190722 - 18	2019-07-22	6	0	0	0	0	0	0	0	0	0	0	0	0	0	0	0					0		0	0
B 20190722 - 19	2019-07-22	6	2	1	0	0	1	0	0	0	0	0	0	0	0	0	0					0		0	0
B 20190722 - 20	2019-07-22	6	2	0	0	0	1	0	0	0	0	0	0	1	0	0	0					0		0	0
B 20190722 - 21	2019-07-22	6	2	0	0	1	0	0	0	0	1	0	0	0	0	0	0					0		0	0
B 20190722 - 22	2019-07-22	6	1	0	0	0	1	0	0	0	0	0	0	0	0	0	0					0		0	0
B 20190722 - 23	2019-07-22	6	1	0	0	0	1	0	0	0	0	0	0	0	0	0	0					0		0	0
B 20190722 - 24	2019-07-22	6	1	0	0	1	0	0	0	0	0	0	0	0	0	0	0					0		0	0
B 20190722 - 25	2019-07-22	6	3	2	0	0	1	0	0	0	0	0	0	0	0	0	0					0		0	0
B 20190722 - 26	2019-07-22	6	1	0	0	1	0	0	0	0	0	0	0	0	0	0	0					0		0	0
B 20190722 - 27	2019-07-22	6	5	2	0	0	1	0	0	0	0	2	0	0	0	0	0	4.47/3.95	Plastic	Fragment	Blue	0		1	1
B 20190722 - 28	2019-07-22	6	0	0	0	0	0	0	0	0	0	0	0	0	0	0	0					0		0	0
B 20190722 - 29	2019-07-22	6	3	0	0	0	0	0	1	0	0	1	0	0	0	1	0	2.57	Plastic	Fragment	Red	0		1	1
B 20190722 - 30	2019-07-22	6	1	0	0	0	0	0	1	0	0	0	0	0	0	0	0					0		0	0
B 20190722 - 31	2019-07-22	6	0	0	0	0	0	0	0	0	0	0	0	0	0	0	0	9.88	Leaf		Opaque	0		0	0
B 20190722 - 32	2019-07-22	6	1	0	0	0	0	0	1	0	0	0	0	0	0	0	0					0		0	0
B 20190722 - 33	2019-07-22	6	4	3	0	1	0	0	0	0	0	0	0	0	0	0	0					0		0	0
B 20190722 - 34	2019-07-22	6	2	0	0	0	0	0	0	0	2	0	0	0	0	0	0					0		0	0
B 20190722 - 35	2019-07-22	6	2	1	0	0	1	0	0	0	0	0	0	0	0	0	0					0		0	0
B 20190722 - 36	2019-07-22	6	0	0	0	0	0	0	0	0	0	0	0	0	0	0	0					0		0	0
B 20190722 - 37	2019-07-22	6	1	0	0	0	1	0	0	0	0	0	0	0	0	0	0					0		0	0
B 20190722 - 38	2019-07-22	6	2	0	0	0	0	0	0	0	2	0	0	0	0	0	0					0		0	0
B 20190722 - 39	2019-07-22	6	5	4	0	0	0	0	1	0	0	0	0	0	0	0	0					0		0	0
B 20190722 - 40	2019-07-22	6	1	0	0	0	0	0	0	0	1	0	0	0	0	0	0					0		0	0
B 20190722 - 41	2019-07-22	6	5	4	0	0	1	0	0	0	0	0	0	0	0	0	0					0		0	0
B 20190722 - 42	2019-07-22	6	0	0	0	0	0	0	0	0	0	0	0	0	0	0	0					0		0	0
B 20190722 - 43	2019-07-22	6	2	2	0	0	0	0	0	0	0	0	0	0	0	0	0					0		0	0
B 20190722 - 44	2019-07-22	6	6	5	0	0	1	0	0	0	0	0	0	0	0	0	0					0		0	0
B 20190722 - 45	2019-07-22	6	2	1	0	0	1	0	0	0	0	0	0	0	0	0	0					0		0	0
B 20190722 - 46	2019-07-22	6	1	0	0	0	0	0	0	0	1	0	0	0	0	0	0					0		0	0
B 20190722 - 47	2019-07-22	6	2	1	0	0	0	0	0	0	1	0	0	0	0	0	0					0		0	0
B 20190722 - 48	2019-07-22	6	13	11	0	0	0	0	0	0	1	0	0	0	1	0	0					0		0	0
B 20190722 - 49	2019-07-22	6	1	1	0	0	0	0	0	0	0	0	0	0	0	0	0	19.54	Unidentified		Black y Brown	0		0	0
B 20190722 - 50	2019-07-22	6	1	0	0	0	1	0	0	0	0	0	0	0	0	0	0					0		0	0
B 20190722 - 51	2019-07-22	6	1	0	0	0	1	0	0	0	0	0	0	0	0	0	0					0		0	0
B 20190722 - 52	2019-07-22	6	3	2	0	0	1	0	0	0	0	0	0	0	0	0	0					0		0	0
B 20190722 - 53	2019-07-22	6	1	0	0	0	0	0	0	0	1	0	0	0	0	0	0					0		0	0
B 20190722 - 54	2019-07-22	6	3	2	0	0	1	0	0	0	0	0	0	0	0	0	0					0		0	0
B 20190722 - 55	2019-07-22	6	0	0	0	0	0	0	0	0	0	0	0	0	0	0	0					0		0	0
B 20190722 - 56	2019-07-22	6	4	1	0	0	0	0	0	0	1	1	1	0	0	0	0	11.4	Natural wood		Brown	0		0	1
B 20190722 - 57	2019-07-22	6	1	1	0	0	0	0	0	0	0	0	0	0	0	0	0					0		0	0
B 20190722 - 58	2019-07-22	6	1	0	0	0	0	0	0	0	0	0	1	0	0	0	0	13.64	metal		Silver	0	1	0	1
B 20190722 - 59	2019-07-22	6	4	1	0	0	0	0	0	0	3	0	0	0	0	0	0					0		0	0
B 20190722 - 60	2019-07-22	6	0	0	0	0	0	0	0	0	0	0	0	0	0	0	0					0		0	0
B 20190722 - 61	2019-07-22	6	1	0	0	0	0	0	0	0	0	0	0	0	1	0	0					0		0	0
B 20190722 - 62	2019-07-22	6	3	3	0	0	0	0	0	0	0	0	0	0	0	0	0					0		0	0
B 20190722 - 63	2019-07-22	6	1	0	0	0	0	0	1	0	0	0	0	0	0	0	0					0		0	0
B 20190722 - 64	2019-07-22	6	0	0	0	0	0	0	0	0	0	0	0	0	0	0	0					0		0	0
B 20190722 - 65	2019-07-22	6	0	0	0	0	0	0	0	0	0	0	0	0	0	0	0					0		0	0
B 20190722 - 66	2019-07-22	6	7	4	0	0	0	0	0	0	3	0	0	0	0	0	0					0		0	0
B 20190722 - 67	2019-07-22	6	0	0	0	0	0	0	0	0	0	0	0	0	0	0	0					0		0	0
B 20190722 - 68	2019-07-22	6	1	0	0	0	0	0	0	0	0	0	0	0	0	0	1					0		0	0
B 20190722 - 69	2019-07-22	6	6	6	0	0	0	0	0	0	0	0	0	0	0	0	0					0		0	0
B 20190722 - 70	2019-07-22	6	0	0	0	0	0	0	0	0	0	0	0	0	0	0	0					0		0	0
B 20190722 - 71	2019-07-22	6	2	0	0	0	0	0	0	0	2	0	0	0	0	0	0					0		0	0
B 20190722 - 72	2019-07-22	6	0	0	0	0	0	0	0	0	0	0	0	0	0	0	0					0		0	0
B 20190722 - 73	2019-07-22	6	6	6	0	0	0	0	0	0	0	0	0	0	0	0	0					0		0	0
B 20190722 - 74	2019-07-22	6	0	0	0	0	0	0	0	0	0	0	0	0	0	0	0					0		0	0
B 20190722 - 75	2019-07-22	6	0	0	0	0	0	0	0	0	0	0	0	0	0	0	0					0		0	0
B 20190722 - 76	2019-07-22	6	3	3	0	0	0	0	0	0	0	0	0	0	0	0	0					0		0	0
B 20190722 - 77	2019-07-22	6	9	8	0	0	0	0	0	0	1	0	0	0	0	0	0					0		0	0
B 20190823 - 01	2019-08-23	7	1	0	0	0	0	0	0	0	1	0	0	0	0	0	0					0		0	0
B 20190823 - 02	2019-08-23	7	0	0	0	0	0	0	0	0	0	0	0	0	0	0	0					0		0	0
B 20190823 - 03	2019-08-23	7	3	2	0	0	1	0	0	0	0	0	0	0	0	0	0					0		0	0
B 20190823 - 04	2019-08-23	7	2	2	0	0	0	0	0	0	0	0	0	0	0	0	0					0		0	0
B 20190823 - 05	2019-08-23	7	1	0	0	0	0	0	0	0	1	0	0	0	0	0	0					0		0	0
B 20190823 - 06	2019-08-23	7	2	2	0	0	0	0	0	0	0	0	0	0	0	0	0					0		0	0
B 20190823 - 07	2019-08-23	7	1	0	0	0	0	0	0	0	0	0	0	0	0	0	1					0		0	0
B 20190823 - 08	2019-08-23	7	3	1	0	0	0	0	1	0	1	0	0	0	0	0	0					0		0	0
B 20190823 - 09	2019-08-23	7	1	0	0	0	0	0	1	0	0	0	0	0	0	0	0					0		0	0
B 20190823 - 10	2019-08-23	7	1	0	0	0	0	0	1	0	0	0	0	0	0	0	0					0		0	0
B 20190823 - 11	2019-08-23	7	0	0	0	0	0	0	0	0	0	0	0	0	0	0	0					0		0	0
B 20190823 - 12	2019-08-23	7	0	0	0	0	0	0	0	0	0	0	0	0	0	0	0					0		0	0
B 20190823 - 13	2019-08-23	7	0	0	0	0	0	0	0	0	0	0	0	0	0	0	0					0		0	0
B 20190823 - 14	2019-08-23	7	0	0	0	0	0	0	0	0	0	0	0	0	0	0	0					0		0	0
B 20190823 - 15	2019-08-23	7	0	0	0	0	0	0	0	0	0	0	0	0	0	0	0					0		0	0
B 20190823 - 16	2019-08-23	7	0	0	0	0	0	0	0	0	0	0	0	0	0	0	0	32.36	Natural wood		Brown	0		0	0
B 20190823 - 17	2019-08-23	7	5	5	0	0	0	0	0	0	0	0	0	0	0	0	0					0		0	0
B 20190823 - 18	2019-08-23	7	5	4	0	0	0	0	0	0	0	0	0	0	0	0	1					0		0	0
B 20190823 - 19	2019-08-23	7	4	4	0	0	0	0	0	0	0	0	0	0	0	0	0					0		0	0
B 20190823 - 20	2019-08-23	7	1	0	0	0	0	0	0	0	1	0	0	0	0	0	0					0		0	0
B 20190823 - 21	2019-08-23	7	1	0	0	0	0	0	0	0	1	0	0	0	0	0	0					0		0	0
B 20190823 - 22	2019-08-23	7	0	0	0	0	0	0	0	0	0	0	0	0	0	0	0					0		0	0
B 20190823 - 23	2019-08-23	7	2	1	0	0	1	0	0	0	0	0	0	0	0	0	0					0		0	0
B 20190823 - 24	2019-08-23	7	0	0	0	0	0	0	0	0	0	0	0	0	0	0	0					0		0	0
B 20190823 - 25	2019-08-23	7	2	2	0	0	0	0	0	0	0	0	0	0	0	0	0					0		0	0
B 20190823 - 26	2019-08-23	7	5	4	0	0	0	0	0	0	0	0	0	0	0	1	0					0		0	0
B 20190823 - 27	2019-08-23	7	5	5	0	0	0	0	0	0	0	0	0	0	0	0	0					0		0	0
B 20190823 - 28	2019-08-23	7	1	1	0	0	0	0	0	0	0	0	0	0	0	0	0					0		0	0
B 20190823 - 29	2019-08-23	7	1	1	0	0	0	0	0	0	0	0	0	0	0	0	0					0		0	0
B 20190823 - 30	2019-08-23	7	0	0	0	0	0	0	0	0	0	0	0	0	0	0	0					0		0	0
B 20190823 - 31	2019-08-23	7	4	3	0	0	0	0	0	0	0	1	0	0	0	0	0	6.66	Plastic	Fragment	Black	0		1	1
B 20190823 - 32	2019-08-23	7	0	0	0	0	0	0	0	0	0	0	0	0	0	0	0					0		0	0
B 20190823 - 33	2019-08-23	7	3	2	0	0	0	0	0	0	0	1	0	0	0	0	0	19.92	Plastic	Threadlike	Blue	0		1	1
B 20190823 - 34	2019-08-23	7	0	0	0	0	0	0	0	0	0	0	0	0	0	0	0					0		0	0
B 20190823 - 35	2019-08-23	7	3	0	0	0	0	0	0	0	3	0	0	0	0	0	0					0		0	0
B 20190823 - 36	2019-08-23	7	4	2	0	0	0	0	0	0	1	0	0	0	0	1	0					0		0	0
B 20190823 - 37	2019-08-23	7	0	0	0	0	0	0	0	0	0	0	0	0	0	0	0					0		0	0
B 20190823 - 38	2019-08-23	7	0	0	0	0	0	0	0	0	0	0	0	0	0	0	0	8.88	Natural wood		Brown	0		0	0
B 20190823 - 39	2019-08-23	7	0	0	0	0	0	0	0	0	0	0	0	0	0	0	0					0		0	0
B 20190823 - 40	2019-08-23	7	3	3	0	0	0	0	0	0	0	0	0	0	0	0	0					0		0	0
B 20190823 - 41	2019-08-23	7	1	1	0	0	0	0	0	0	0	0	0	0	0	0	0					0		0	0
B 20190823 - 42	2019-08-23	7	1	1	0	0	0	0	0	0	0	0	0	0	0	0	0					0		0	0
B 20190823 - 43	2019-08-23	7	3	1	0	0	0	0	0	0	2	0	0	0	0	0	0					0		0	0
B 20190823 - 44	2019-08-23	7	2	1	0	0	0	0	0	0	0	0	0	0	0	0	1					0		0	0
B 20190823 - 45	2019-08-23	7	0	0	0	0	0	0	0	0	0	0	0	0	0	0	0					0		0	0
B 20190823 - 46	2019-08-23	7	0	0	0	0	0	0	0	0	0	0	0	0	0	0	0					0		0	0
B 20190823 - 47	2019-08-23	7	3	3	0	0	0	0	0	0	0	0	0	0	0	0	0					0		0	0
B 20190823 - 48	2019-08-23	7	0	0	0	0	0	0	0	0	0	0	0	0	0	0	0					0		0	0
B 20190823 - 49	2019-08-23	7	1	0	0	0	0	0	1	0	0	0	0	0	0	0	0					0		0	0
B 20190823 - 50	2019-08-23	7	4	2	0	0	0	0	0	0	2	0	0	0	0	0	0					0		0	0
B 20190823 - 51	2019-08-23	7	0	0	0	0	0	0	0	0	0	0	0	0	0	0	0					0		0	0
B 20190823 - 52	2019-08-23	7	0	0	0	0	0	0	0	0	0	0	0	0	0	0	0	5.18	Natural wood		Brown	0		0	0
B 20190823 - 53	2019-08-23	7	0	0	0	0	0	0	0	0	0	0	0	0	0	0	0					0		0	0
B 20190823 - 54	2019-08-23	7	5	5	0	0	0	0	0	0	0	0	0	0	0	0	0					0		0	0
B 20190823 - 55	2019-08-23	7	4	4	0	0	0	0	0	0	0	0	0	0	0	0	0					0		0	0
B 20190823 - 56	2019-08-23	7	4	4	0	0	0	0	0	0	0	0	0	0	0	0	0					0		0	0
B 20190823 - 57	2019-08-23	7	3	3	0	0	0	0	0	0	0	0	0	0	0	0	0					0		0	0
B 20190823 - 58	2019-08-23	7	0	0	0	0	0	0	0	0	0	0	0	0	0	0	0					0		0	0
B 20190823 - 59	2019-08-23	7	0	0	0	0	0	0	0	0	0	0	0	0	0	0	0					0		0	0
B 20190823 - 60	2019-08-23	7	1	0	0	0	0	0	0	0	0	1	0	0	0	0	0	3.06	Plastic	Threadlike	Orange	0		1	1
B 20190930 - 01	2019-09-30	8	2	1	0	0	0	0	0	0	1	0	0	0	0	0	0					0		0	0
B 20190930 - 02	2019-09-30	8	2	1	0	0	0	0	0	0	0	1	0	0	0	0	0	8.74	Plastic	Fragment	Red	0		1	1
B 20190930 - 03	2019-09-30	8	2	1	0	0	0	0	0	0	0	1	0	0	0	0	0	5.66	Plastic	Threadlike	Blue	0		1	1
B 20190930 - 04	2019-09-30	8	1	0	0	0	0	0	0	0	0	0	0	0	0	0	1					0		0	0
B 20190930 - 05	2019-09-30	8	1	0	0	0	0	0	0	0	0	1	0	0	0	0	0	10.03	Plastic	Fragment	Blue	0		1	1
B 20190930 - 06	2019-09-30	8	0	0	0	0	0	0	0	0	0	0	0	0	0	0	0					0		0	0
B 20190930 - 07	2019-09-30	8	0	0	0	0	0	0	0	0	0	0	0	0	0	0	0					0		0	0
B 20190930 - 08	2019-09-30	8	4	3	0	1	0	0	0	0	0	0	0	0	0	0	0					0		0	0
B 20190930 - 09	2019-09-30	8	4	3	0	1	0	0	0	0	0	0	0	0	0	0	0					0		0	0
B 20190930 - 10	2019-09-30	8	4	2	0	1	0	0	0	0	1	0	0	0	0	0	0					0		0	0
B 20190930 - 11	2019-09-30	8	2	1	0	0	0	0	0	0	0	1	0	0	0	0	0	2.4	Plastic	Fragment	Blue	0		1	1
B 20190930 - 12	2019-09-30	8	0	0	0	0	0	0	0	0	0	0	0	0	0	0	0					0		0	0
B 20190930 - 13	2019-09-30	8	0	0	0	0	0	0	0	0	0	0	0	0	0	0	0					0		0	0
B 20190930 - 14	2019-09-30	8	6	5	0	0	1	0	0	0	0	0	0	0	0	0	0					0		0	0
B 20190930 - 15	2019-09-30	8	0	0	0	0	0	0	0	0	0	0	0	0	0	0	0					0		0	0
B 20190930 - 16	2019-09-30	8	0	0	0	0	0	0	0	0	0	0	0	0	0	0	0					0		0	0
B 20190930 - 17	2019-09-30	8	6	6	0	0	0	0	0	0	0	0	0	0	0	0	0					0		0	0
B 20190930 - 18	2019-09-30	8	5	2	0	0	0	0	0	0	2	0	0	0	0	0	1					0		0	0
B 20190930 - 19	2019-09-30	8	2	0	0	0	1	0	0	0	1	0	0	0	0	0	0					0		0	0
B 20190930 - 20	2019-09-30	8	0	0	0	0	0	0	0	0	0	0	0	0	0	0	0					0		0	0
B 20190930 - 21	2019-09-30	8	0	0	0	0	0	0	0	0	0	0	0	0	0	0	0					0		0	0
B 20190930 - 22	2019-09-30	8	5	5	0	0	0	0	0	0	0	0	0	0	0	0	0					0		0	0
B 20190930 - 23	2019-09-30	8	2	2	0	0	0	0	0	0	0	0	0	0	0	0	0					0		0	0
B 20190930 - 24	2019-09-30	8	2	2	0	0	0	0	0	0	0	0	0	0	0	0	0					0		0	0
B 20190930 - 25	2019-09-30	8	3	0	0	0	0	0	0	0	3	0	0	0	0	0	0					0		0	0
B 20190930 - 26	2019-09-30	8	2	1	0	0	0	0	0	0	0	1	0	0	0	0	0	1.38	Plastic	Sheetlike	Green	0		1	1
B 20190930 - 27	2019-09-30	8	1	1	0	0	0	0	0	0	0	0	0	0	0	0	0					0		0	0
B 20190930 - 28	2019-09-30	8	4	4	0	0	0	0	0	0	0	0	0	0	0	0	0					0		0	0
B 20190930 - 29	2019-09-30	8	6	5	0	0	0	0	1	0	0	0	0	0	0	0	0	65.24	Natural wood		Brown	0		0	0
B 20190930 - 30	2019-09-30	8	3	3	0	0	0	0	0	0	0	0	0	0	0	0	0					0		0	0
B 20190930 - 31	2019-09-30	8	2	2	0	0	0	0	0	0	0	0	0	0	0	0	0					0		0	0
B 20190930 - 32	2019-09-30	8	14	14	0	0	0	0	0	0	0	0	0	0	0	0	0					0		0	0
B 20190930 - 33	2019-09-30	8	0	0	0	0	0	0	0	0	0	0	0	0	0	0	0					0		0	0
B 20190930 - 34	2019-09-30	8	9	9	0	0	0	0	0	0	0	0	0	0	0	0	0					0		0	0
B 20190930 - 35	2019-09-30	8	1	0	0	0	0	0	0	0	1	0	0	0	0	0	0					0		0	0
B 20191027 - 01	2019-10-27	9	0	0	0	0	0	0	0	0	0	0	0	0	0	0	0					0		0	0
B 20191027 - 02	2019-10-27	9	5	5	0	0	0	0	0	0	0	0	0	0	0	0	0					0		0	0
B 20191027 - 03	2019-10-27	9	3	0	3	0	0	0	0	0	0	0	0	0	0	0	0					0		0	0
B 20191027 - 04	2019-10-27	9	11	11	0	0	0	0	0	0	0	0	0	0	0	0	0					0		0	0
B 20191027 - 05	2019-10-27	9	0	0	0	0	0	0	0	0	0	0	0	0	0	0	0					0		0	0
B 20191027 - 06	2019-10-27	9	0	0	0	0	0	0	0	0	0	0	0	0	0	0	0					0		0	0
B 20191027 - 07	2019-10-27	9	2	0	0	0	0	0	0	0	0	2	0	0	0	0	0	176.81/26.86	Plastic	Threadlike	Translucid	0		1	1
B 20191027 - 08	2019-10-27	9	6	6	0	0	0	0	0	0	0	0	0	0	0	0	0					0		0	0
B 20191027 - 09	2019-10-27	9	0	0	0	0	0	0	0	0	0	0	0	0	0	0	0					0		0	0
B 20191027 - 10	2019-10-27	9	2	0	2	0	0	0	0	0	0	0	0	0	0	0	0					0		0	0
B 20191027 - 11	2019-10-27	9	22	22	0	0	0	0	0	0	0	0	0	0	0	0	0					0		0	0
B 20191027 - 12	2019-10-27	9	9	9	0	0	0	0	0	0	0	0	0	0	0	0	0					0		0	0
B 20191027 - 13	2019-10-27	9	3	2	0	1	0	0	0	0	0	0	0	0	0	0	0					0		0	0
B 20191027 - 14	2019-10-27	9	0	0	0	0	0	0	0	0	0	0	0	0	0	0	0					0		0	0
B 20191027 - 15	2019-10-27	9	0	0	0	0	0	0	0	0	0	0	0	0	0	0	0					0		0	0
B 20191027 - 16	2019-10-27	9	2	0	2	0	0	0	0	0	0	0	0	0	0	0	0					0		0	0
B 20191027 - 17	2019-10-27	9	11	11	0	0	0	0	0	0	0	0	0	0	0	0	0					0		0	0
B 20191027 - 18	2019-10-27	9	4	4	0	0	0	0	0	0	0	0	0	0	0	0	0					0		0	0
B 20191027 - 19	2019-10-27	9	21	21	0	0	0	0	0	0	0	0	0	0	0	0	0					0		0	0
B 20191027 - 20	2019-10-27	9	14	14	0	0	0	0	0	0	0	0	0	0	0	0	0					0		0	0
B 20191027 - 21	2019-10-27	9	0	0	0	0	0	0	0	0	0	0	0	0	0	0	0					0		0	0
B 20191027 - 22	2019-10-27	9	34	33	0	0	0	0	0	0	0	1	0	0	0	0	0	30.12	Plastic	Threadlike	Red	0		1	1
B 20191027 - 23	2019-10-27	9	4	0	0	4	0	0	0	0	0	0	0	0	0	0	0					0		0	0
B 20191027 - 24	2019-10-27	9	0	0	0	0	0	0	0	0	0	0	0	0	0	0	0					0		0	0
B 20191027 - 25	2019-10-27	9	1	0	1	0	0	0	0	0	0	0	0	0	0	0	0					0		0	0
B 20191027 - 26	2019-10-27	9	9	9	0	0	0	0	0	0	0	0	0	0	0	0	0					0		0	0
B 20191027 - 27	2019-10-27	9	1	1	0	0	0	0	0	0	0	0	0	0	0	0	0					0		0	0
B 20191027 - 28	2019-10-27	9	4	0	0	0	4	0	0	0	0	0	0	0	0	0	0					0		0	0
B 20191027 - 29	2019-10-27	9	9	8	0	0	0	0	0	0	0	1	0	0	0	0	0	4.5	Plastic	Sheetlike	Green	0		1	1
B 20191027 - 30	2019-10-27	9	20	20	0	0	0	0	0	0	0	0	0	0	0	0	0					0		0	0
B 20191027 - 31	2019-10-27	9	6	0	0	0	0	0	6	0	0	0	0	0	0	0	0					0		0	0
B 20191027 - 32	2019-10-27	9	0	0	0	0	0	0	0	0	0	0	0	0	0	0	0					0		0	0
B 20191027 - 33	2019-10-27	9	4	0	0	0	3	0	0	0	0	0	0	0	0	1	0					0		0	0
B 20191027 - 34	2019-10-27	9	0	0	0	0	0	0	0	0	0	0	0	0	0	0	0					0		0	0
B 20191027 - 35	2019-10-27	9	1	0	0	1	0	0	0	0	0	0	0	0	0	0	0					0		0	0
B 20191027 - 36	2019-10-27	9	10	10	0	0	0	0	0	0	0	0	0	0	0	0	0					0		0	0
B 20191027 - 37	2019-10-27	9	4	0	0	0	0	0	0	4	0	0	0	0	0	0	0					0		0	0
B 20191027 - 38	2019-10-27	9	9	9	0	0	0	0	0	0	0	0	0	0	0	0	0					0		0	0
B 20191027 - 39	2019-10-27	9	5	0	0	0	5	0	0	0	0	0	0	0	0	0	0					0		0	0
B 20191027 - 40	2019-10-27	9	4	4	0	0	0	0	0	0	0	0	0	0	0	0	0					0		0	0
B 20191027 - 41	2019-10-27	9	3	3	0	0	0	0	0	0	0	0	0	0	0	0	0					0		0	0
B 20191027 - 42	2019-10-27	9	9	9	0	0	0	0	0	0	0	0	0	0	0	0	0					0		0	0
B 20191027 - 43	2019-10-27	9	21	21	0	0	0	0	0	0	0	0	0	0	0	0	0					0		0	0
B 20191027 - 44	2019-10-27	9	2	0	0	2	0	0	0	0	0	0	0	0	0	0	0					0		0	0
B 20191027 - 45	2019-10-27	9	1	1	0	0	0	0	0	0	0	0	0	0	0	0	0					0		0	0
B 20191027 - 46	2019-10-27	9	1	0	1	0	0	0	0	0	0	0	0	0	0	0	0					0		0	0
B 20191027 - 47	2019-10-27	9	0	0	0	0	0	0	0	0	0	0	0	0	0	0	0					0		0	0
B 20191027 - 48	2019-10-27	9	3	3	0	0	0	0	0	0	0	0	0	0	0	0	0					0		0	0
B 20191027 - 49	2019-10-27	9	0	0	0	0	0	0	0	0	0	0	0	0	0	0	0					0		0	0
B 20191027 - 50	2019-10-27	9	1	0	1	0	0	0	0	0	0	0	0	0	0	0	0					0		0	0
B 20191027 - 51	2019-10-27	9	4	0	0	3	0	0	0	1	0	0	0	0	0	0	0					0		0	0
B 20191027 - 52	2019-10-27	9	16	16	0	0	0	0	0	0	0	0	0	0	0	0	0					0		0	0
B 20191027 - 53	2019-10-27	9	28	28	0	0	0	0	0	0	0	0	0	0	0	0	0					0		0	0
B 20191027 - 54	2019-10-27	9	5	0	0	0	5	0	0	0	0	0	0	0	0	0	0					0		0	0
B 20191027 - 55	2019-10-27	9	22	22	0	0	0	0	0	0	0	0	0	0	0	0	0					0		0	0
B 20191027 - 56	2019-10-27	9	1	0	0	1	0	0	0	0	0	0	0	0	0	0	0					0		0	0
B 20191027 - 57	2019-10-27	9	5	4	0	1	0	0	0	0	0	0	0	0	0	0	0					0		0	0
B 20191027 - 58	2019-10-27	9	2	0	2	0	0	0	0	0	0	0	0	0	0	0	0					0		0	0
B 20191027 - 59	2019-10-27	9	13	13	0	0	0	0	0	0	0	0	0	0	0	0	0					0		0	0
B 20191027 - 60	2019-10-27	9	1	0	0	0	0	0	0	0	0	0	0	1	0	0	0					0		0	0
B 20191027 - 61	2019-10-27	9	25	25	0	0	0	0	0	0	0	0	0	0	0	0	0					0		0	0
B 20191027 - 62	2019-10-27	9	3	3	0	0	0	0	0	0	0	0	0	0	0	0	0					0		0	0
B 20191027 - 63	2019-10-27	9	2	0	2	0	0	0	0	0	0	0	0	0	0	0	0					0		0	0
B 20191027 - 64	2019-10-27	9	3	2	0	1	0	0	0	0	0	0	0	0	0	0	0					0		0	0
B 20191027 - 65	2019-10-27	9	0	0	0	0	0	0	0	0	0	0	0	0	0	0	0					0		0	0
B 20191027 - 66	2019-10-27	9	21	21	0	0	0	0	0	0	0	0	0	0	0	0	0					0		0	0
B 20191027 - 67	2019-10-27	9	38	38	0	0	0	0	0	0	0	0	0	0	0	0	0					0		0	0
B 20191027 - 68	2019-10-27	9	0	0	0	0	0	0	0	0	0	0	0	0	0	0	0					0		0	0
B 20191027 - 69	2019-10-27	9	1	0	0	1	0	0	0	0	0	0	0	0	0	0	0					0		0	0
B 20191027 - 70	2019-10-27	9	10	10	0	0	0	0	0	0	0	0	0	0	0	0	0					0		0	0
B 20191027 - 71	2019-10-27	9	11	10	0	1	0	0	0	0	0	0	0	0	0	0	0					0		0	0
B 20191027 - 72	2019-10-27	9	7	6	0	1	0	0	0	0	0	0	0	0	0	0	0					0		0	0
B 20191027 - 73	2019-10-27	9	3	0	3	0	0	0	0	0	0	0	0	0	0	0	0					0		0	0
B 20191027 - 74	2019-10-27	9	7	7	0	0	0	0	0	0	0	0	0	0	0	0	0					0		0	0
B 20191027 - 75	2019-10-27	9	0	0	0	0	0	0	0	0	0	0	0	0	0	0	0					0		0	0
B 20191027 - 76	2019-10-27	9	5	5	0	0	0	0	0	0	0	0	0	0	0	0	0					0		0	0
B 20191027 - 77	2019-10-27	9	0	0	0	0	0	0	0	0	0	0	0	0	0	0	0					0		0	0
B 20191027 - 78	2019-10-27	9	8	8	0	0	0	0	0	0	0	0	0	0	0	0	0					0		0	0
B 20191027 - 79	2019-10-27	9	2	0	2	0	0	0	0	0	0	0	0	0	0	0	0					0		0	0
B 20191027 - 80	2019-10-27	9	1	0	1	0	0	0	0	0	0	0	0	0	0	0	0					0		0	0
B 20191027 - 81	2019-10-27	9	12	11	0	0	0	0	0	0	0	1	0	0	0	0	0	86.91	Plastic	Threadlike	Translucid	0		1	1
B 20191027 - 82	2019-10-27	9	10	10	0	0	0	0	0	0	0	0	0	0	0	0	0					0		0	0
B 20191027 - 83	2019-10-27	9	2	2	0	0	0	0	0	0	0	0	0	0	0	0	0					0		0	0
B 20191027 - 84	2019-10-27	9	4	0	1	0	0	0	0	0	0	0	0	0	3	0	0					0		0	0
B 20191027 - 85	2019-10-27	9	2	2	0	0	0	0	0	0	0	0	0	0	0	0	0					0		0	0
B 20191027 - 86	2019-10-27	9	1	1	0	0	0	0	0	0	0	0	0	0	0	0	0					0		0	0
B 20191027 - 87	2019-10-27	9	4	2	0	2	0	0	0	0	0	0	0	0	0	0	0					0		0	0
B 20191027 - 88	2019-10-27	9	0	0	0	0	0	0	0	0	0	0	0	0	0	0	0					0		0	0
B 20191027 - 89	2019-10-27	9	0	0	0	0	0	0	0	0	0	0	0	0	0	0	0					0		0	0
B 20191027 - 90	2019-10-27	9	0	0	0	0	0	0	0	0	0	0	0	0	0	0	0					0		0	0
B 20191121 - 01	2019-11-21	10	2	1	0	0	0	0	0	0	1	0	0	0	0	0	0					0		0	0
B 20191121 - 02	2019-11-21	10	2	2	0	0	0	0	0	0	0	0	0	0	0	0	0					0		0	0
B 20191121 - 03	2019-11-21	10	3	2	0	0	0	0	0	0	0	0	1	0	0	0	0	27.42	Fibers		White	0	1	0	1
B 20191121 - 04	2019-11-21	10	2	2	0	0	0	0	0	0	0	0	0	0	0	0	0					0		0	0
B 20191121 - 05	2019-11-21	10	1	1	0	0	0	0	0	0	0	0	0	0	0	0	0					0		0	0
B 20191121 - 06	2019-11-21	10	3	3	0	0	0	0	0	0	0	0	0	0	0	0	0					0		0	0
B 20191121 - 07	2019-11-21	10	2	1	0	0	0	0	1	0	0	0	0	0	0	0	0					0		0	0
B 20191121 - 08	2019-11-21	10	1	0	0	0	1	0	0	0	0	0	0	0	0	0	0					0		0	0
B 20191121 - 09	2019-11-21	10	5	5	0	0	0	0	0	0	0	0	0	0	0	0	0					0		0	0
B 20191121 - 10	2019-11-21	10	2	2	0	0	0	0	0	0	0	0	0	0	0	0	0					0		0	0
B 20191121 - 11	2019-11-21	10	4	4	0	0	0	0	0	0	0	0	0	0	0	0	0					0		0	0
B 20191121 - 12	2019-11-21	10	3	1	0	0	0	0	0	0	0	1	1	0	0	0	0	7.7/5.6	Plastic/ Iron	Sheetlike	Green	0	1	1	1
B 20191121 - 13	2019-11-21	10	1	0	0	0	0	0	0	0	0	0	0	0	0	0	1					0		0	0
B 20191121 - 14	2019-11-21	10	2	2	0	0	0	0	0	0	0	0	0	0	0	0	0					0		0	0
B 20191121 - 15	2019-11-21	10	1	0	0	0	0	0	1	0	0	0	0	0	0	0	0					0		0	0
B 20191121 - 16	2019-11-21	10	0	0	0	0	0	0	0	0	0	0	0	0	0	0	0					0		0	0
B 20191121 - 17	2019-11-21	10	0	0	0	0	0	0	0	0	0	0	0	0	0	0	0					0		0	0
B 20191121 - 18	2019-11-21	10	3	0	0	1	0	0	0	0	2	0	0	0	0	0	0					0		0	0
B 20191121 - 19	2019-11-21	10	1	0	0	0	0	0	0	0	1	0	0	0	0	0	0					0		0	0
B 20191121 - 20	2019-11-21	10	2	1	0	0	0	0	0	0	1	0	0	0	0	0	0					0		0	0
B 20191121 - 21	2019-11-21	10	4	4	0	0	0	0	0	0	0	0	0	0	0	0	0					0		0	0
B 20191121 - 22	2019-11-21	10	2	1	0	0	0	0	0	0	0	1	0	0	0	0	0	21.41	Plastic	Threadlike	Violet	0		1	1
B 20191121 - 23	2019-11-21	10	2	2	0	0	0	0	0	0	0	0	0	0	0	0	0					0		0	0
B 20191121 - 24	2019-11-21	10	2	2	0	0	0	0	0	0	0	0	0	0	0	0	0					0		0	0
B 20191121 - 25	2019-11-21	10	0	0	0	0	0	0	0	0	0	0	0	0	0	0	0					0		0	0
B 20191121 - 26	2019-11-21	10	0	0	0	0	0	0	0	0	0	0	0	0	0	0	0					0		0	0
B 20191121 - 27	2019-11-21	10	5	5	0	0	0	0	0	0	0	0	0	0	0	0	0					0		0	0
B 20191121 - 28	2019-11-21	10	12	11	0	0	0	0	0	0	0	1	0	0	0	0	0	18.39	Plastic	Sheetlike	Translucid	0		1	1
B 20191121 - 29	2019-11-21	10	3	0	0	0	0	0	0	0	3	0	0	0	0	0	0					0		0	0
B 20191121 - 30	2019-11-21	10	2	2	0	0	0	0	0	0	0	0	0	0	0	0	0					0		0	0
B 20191121 - 31	2019-11-21	10	1	0	0	1	0	0	0	0	0	0	0	0	0	0	0					0		0	0
B 20191121 - 32	2019-11-21	10	1	0	0	0	0	0	0	0	0	0	0	1	0	0	0					0		0	0
B 20191121 - 33	2019-11-21	10	0	0	0	0	0	0	0	0	0	0	0	0	0	0	0					0		0	0
B 20191121 - 34	2019-11-21	10	0	0	0	0	0	0	0	0	0	0	0	0	0	0	0					0		0	0
B 20191121 - 35	2019-11-21	10	5	4	0	0	1	0	0	0	0	0	0	0	0	0	0					0		0	0
B 20191121 - 36	2019-11-21	10	1	0	0	0	1	0	0	0	0	0	0	0	0	0	0					0		0	0
B 20191121 - 37	2019-11-21	10	1	0	0	0	1	0	0	0	0	0	0	0	0	0	0					0		0	0
B 20191121 - 38	2019-11-21	10	1	0	0	0	1	0	0	0	0	0	0	0	0	0	0					0		0	0
B 20191121 - 39	2019-11-21	10	7	6	0	0	1	0	0	0	0	0	0	0	0	0	0					0		0	0
B 20191121 - 40	2019-11-21	10	0	0	0	0	0	0	0	0	0	0	0	0	0	0	0					0		0	0
B 20191121 - 41	2019-11-21	10	0	0	0	0	0	0	0	0	0	0	0	0	0	0	0					0		0	0
B 20191121 - 42	2019-11-21	10	0	0	0	0	0	0	0	0	0	0	0	0	0	0	0					0		0	0
B 20191121 - 43	2019-11-21	10	0	0	0	0	0	0	0	0	0	0	0	0	0	0	0					0		0	0
B 20191121 - 44	2019-11-21	10	2	0	0	0	0	0	0	0	2	0	0	0	0	0	0					0		0	0
B 20191121 - 45	2019-11-21	10	1	1	0	0	0	0	0	0	0	0	0	0	0	0	0					0		0	0
B 20191121 - 46	2019-11-21	10	1	1	0	0	0	0	0	0	0	0	0	0	0	0	0					0		0	0
B 20191121 - 47	2019-11-21	10	1	1	0	0	0	0	0	0	0	0	0	0	0	0	0					0		0	0
B 20191121 - 48	2019-11-21	10	1	1	0	0	0	0	0	0	0	0	0	0	0	0	0					0		0	0
B 20191121 - 49	2019-11-21	10	1	1	0	0	0	0	0	0	0	0	0	0	0	0	0					0		0	0
B 20191121 - 50	2019-11-21	10	0	0	0	0	0	0	0	0	0	0	0	0	0	0	0	6.84	Natural wood		Brown	0		0	0
B 20191121 - 51	2019-11-21	10	1	0	0	0	0	0	0	0	0	1	0	0	0	0	0	3.97	Plastic	Fragment	White	0		1	1
B 20191222 - 01	2019-12-22	11	6	5	0	0	0	0	1	0	0	0	0	0	0	0	0					0		0	0
B 20191222 - 02	2019-12-22	11	1	0	0	0	0	0	0	0	0	0	0	0	0	1	0					0		0	0
B 20191222 - 03	2019-12-22	11	1	0	0	1	0	0	0	0	0	0	0	0	0	0	0					0		0	0
B 20191222 - 04	2019-12-22	11	4	3	0	0	0	0	0	0	0	0	0	0	0	0	1					0		0	0
B 20191222 - 05	2019-12-22	11	2	1	0	0	0	0	0	0	0	0	0	0	0	0	1					0		0	0
B 20191222 - 06	2019-12-22	11	2	1	0	0	1	0	0	0	0	0	0	0	0	0	0					0		0	0
B 20191222 - 07	2019-12-22	11	2	2	0	0	0	0	0	0	0	0	0	0	0	0	0					0		0	0
B 20191222 - 08	2019-12-22	11	2	1	0	0	0	0	0	0	0	1	0	0	0	0	0	9.71	Plastic	Sheetlike	Translucid	0		1	1
B 20191222 - 09	2019-12-22	11	1	0	0	0	0	0	0	0	0	1	0	0	0	0	0	8.71	Plastic	Threadlike	Violet	0		1	1
B 20191222 - 10	2019-12-22	11	4	0	0	0	0	0	0	0	3	1	0	0	0	0	0	5.19	Plastic	Threadlike	Violet	0		1	1
B 20191222 - 11	2019-12-22	11	2	2	0	0	0	0	0	0	0	0	0	0	0	0	0					0		0	0
B 20191222 - 12	2019-12-22	11	2	1	0	0	0	0	0	0	0	0	0	0	0	1	0					0		0	0
B 20191222 - 13	2019-12-22	11	5	5	0	0	0	0	0	0	0	0	0	0	0	0	0					0		0	0
B 20191222 - 14	2019-12-22	11	2	2	0	0	0	0	0	0	0	0	0	0	0	0	0					0		0	0
B 20191222 - 15	2019-12-22	11	1	0	0	0	0	0	0	0	0	1	0	0	0	0	0	4.37	Plastic	Threadlike	Purple	0		1	1
B 20191222 - 16	2019-12-22	11	1	0	0	0	0	0	0	0	0	0	0	0	0	0	1					0		0	0
B 20191222 - 17	2019-12-22	11	1	1	0	0	0	0	0	0	0	0	0	0	0	0	0					0		0	0
B 20191222 - 18	2019-12-22	11	1	1	0	0	0	0	0	0	0	0	0	0	0	0	0					0		0	0
B 20191222 - 19	2019-12-22	11	1	1	0	0	0	0	0	0	0	0	0	0	0	0	0					0		0	0
B 20191222 - 20	2019-12-22	11	2	0	0	0	0	0	0	0	1	1	0	0	0	0	0	13.35	Plastic	Sheetlike	Translucid	0		1	1
B 20191222 - 21	2019-12-22	11	4	0	0	0	0	0	0	0	1	3	0	0	0	0	0	3.71/3.88/4.74	Plastic	Threadlike	Violet	0		1	1
B 20191222 - 22	2019-12-22	11	0	0	0	0	0	0	0	0	0	0	0	0	0	0	0					0		0	0
B 20191222 - 23	2019-12-22	11	3	3	0	0	0	0	0	0	0	0	0	0	0	0	0					0		0	0
B 20191222 - 24	2019-12-22	11	5	5	0	0	0	0	0	0	0	0	0	0	0	0	0					0		0	0
B 20191222 - 25	2019-12-22	11	6	5	0	0	0	0	1	0	0	0	0	0	0	0	0					0		0	0
B 20191222 - 26	2019-12-22	11	2	1	0	0	0	0	1	0	0	0	0	0	0	0	0					0		0	0
B 20191222 - 27	2019-12-22	11	2	1	0	0	0	0	0	0	0	1	0	0	0	0	0	4.92	Plastic	Fragment	Blue	0		1	1
B 20191222 - 28	2019-12-22	11	0	0	0	0	0	0	0	0	0	0	0	0	0	0	0					0		0	0
B 20191222 - 29	2019-12-22	11	1	0	0	0	1	0	0	0	0	0	0	0	0	0	0					0		0	0
B 20191222 - 30	2019-12-22	11	0	0	0	0	0	0	0	0	0	0	0	0	0	0	0					0		0	0
B 20191222 - 31	2019-12-22	11	4	4	0	0	0	0	0	0	0	0	0	0	0	0	0					0		0	0
B 20191222 - 32	2019-12-22	11	1	0	0	1	0	0	0	0	0	0	0	0	0	0	0					0		0	0
B 20191222 - 33	2019-12-22	11	3	3	0	0	0	0	0	0	0	0	0	0	0	0	0					0		0	0
B 20191222 - 34	2019-12-22	11	3	3	0	0	0	0	0	0	0	0	0	0	0	0	0					0		0	0
B 20191222 - 35	2019-12-22	11	2	2	0	0	0	0	0	0	0	0	0	0	0	0	0					0		0	0
B 20191222 - 36	2019-12-22	11	1	0	0	1	0	0	0	0	0	0	0	0	0	0	0					0		0	0
B 20191222 - 37	2019-12-22	11	1	1	0	0	0	0	0	0	0	0	0	0	0	0	0					0		0	0
B 20191222 - 38	2019-12-22	11	3	2	0	0	0	0	0	0	0	1	0	0	0	0	0	4.8	Plastic	Fragment	Blue	0		1	1
B 20191222 - 39	2019-12-22	11	2	0	0	0	0	0	0	0	2	0	0	0	0	0	0					0		0	0
B 20191222 - 40	2019-12-22	11	5	4	0	0	0	0	0	0	0	1	0	0	0	0	0	13.97	Plastic	Threadlike	Violet	0		1	1
B 20191222 - 41	2019-12-22	11	1	0	0	0	1	0	0	0	0	0	0	0	0	0	0					0		0	0
B 20191222 - 42	2019-12-22	11	1	0	0	0	1	0	0	0	0	0	0	0	0	0	0					0		0	0
B 20191222 - 43	2019-12-22	11	5	5	0	0	0	0	0	0	0	0	0	0	0	0	0					0		0	0
B 20191222 - 44	2019-12-22	11	0	0	0	0	0	0	0	0	0	0	0	0	0	0	0					0		0	0
B 20191222 - 45	2019-12-22	11	3	2	0	0	0	0	0	0	0	1	0	0	0	0	0	6.32	Plastic	Fragment	Yellow translucid	0		1	1
B 20191222 - 46	2019-12-22	11	2	0	0	0	0	0	0	0	1	1	0	0	0	0	0	3.74	Plastic	Fragment	Red	0		1	1
B 20191222 - 47	2019-12-22	11	3	1	0	0	1	0	0	0	0	1	0	0	0	0	0	14.22	Plastic	Fragment	Black	0		1	1
B 20191222 - 48	2019-12-22	11	1	0	0	0	0	0	0	0	0	1	0	0	0	0	0	9.33	Plastic	Sheetlike	Green	0		1	1
B 20191222 - 49	2019-12-22	11	1	0	0	1	0	0	0	0	0	0	0	0	0	0	0					0		0	0
B 20191222 - 50	2019-12-22	11	0	0	0	0	0	0	0	0	0	0	0	0	0	0	0					0		0	0
B 20191222 - 51	2019-12-22	11	2	0	0	0	0	0	0	0	2	0	0	0	0	0	0					0		0	0
B 20191222 - 52	2019-12-22	11	0	0	0	0	0	0	0	0	0	0	0	0	0	0	0					0		0	0
B 20191222 - 53	2019-12-22	11	2	2	0	0	0	0	0	0	0	0	0	0	0	0	0					0		0	0
B 20191222 - 54	2019-12-22	11	0	0	0	0	0	0	0	0	0	0	0	0	0	0	0					0		0	0
B 20191222 - 55	2019-12-22	11	3	1	0	0	1	0	0	0	0	1	0	0	0	0	0	27.2	Plastic	Fragment	Black	0		1	1
B 20191222 - 56	2019-12-22	11	0	0	0	0	0	0	0	0	0	0	0	0	0	0	0					0		0	0
B 20191222 - 57	2019-12-22	11	0	0	0	0	0	0	0	0	0	0	0	0	0	0	0					0		0	0
B 20191222 - 58	2019-12-22	11	1	0	0	0	0	0	0	0	0	1	0	0	0	0	0	30.29	Plastic	Sheetlike	Translucid	0		1	1
B 20191222 - 59	2019-12-22	11	6	4	0	0	1	0	0	0	0	1	0	0	0	0	0	5.94	Plastic	Fragment	Yellow translucid	0		1	1
B 20191222 - 60	2019-12-22	11	0	0	0	0	0	0	0	0	0	0	0	0	0	0	0					0		0	0
B 20191222 - 61	2019-12-22	11	1	0	0	0	0	0	0	0	1	0	0	0	0	0	0					0		0	0
B 20191222 - 62	2019-12-22	11	5	3	0	1	0	0	0	0	1	0	0	0	0	0	0					0		0	0
B 20191222 - 63	2019-12-22	11	1	0	0	1	0	0	0	0	0	0	0	0	0	0	0					0		0	0
B 20191222 - 64	2019-12-22	11	0	0	0	0	0	0	0	0	0	0	0	0	0	0	0					0		0	0
B 20191222 - 65	2019-12-22	11	3	2	0	0	0	0	1	0	0	0	0	0	0	0	0					0		0	0
B 20191222 - 66	2019-12-22	11	0	0	0	0	0	0	0	0	0	0	0	0	0	0	0					0		0	0
B 20191222 - 67	2019-12-22	11	2	2	0	0	0	0	0	0	0	0	0	0	0	0	0					0		0	0
B 20191222 - 68	2019-12-22	11	1	1	0	0	0	0	0	0	0	0	0	0	0	0	0					0		0	0
B 20191222 - 69	2019-12-22	11	1	0	0	0	0	0	1	0	0	0	0	0	0	0	0					0		0	0
B 20191222 - 70	2019-12-22	11	0	0	0	0	0	0	0	0	0	0	0	0	0	0	0					0		0	0
B 20191222 - 71	2019-12-22	11	0	0	0	0	0	0	0	0	0	0	0	0	0	0	0					0		0	0
B 20191222 - 72	2019-12-22	11	0	0	0	0	0	0	0	0	0	0	0	0	0	0	0					0		0	0
B 20191222 - 73	2019-12-22	11	2	2	0	0	0	0	0	0	0	0	0	0	0	0	0					0		0	0
B 20191222 - 74	2019-12-22	11	1	0	0	0	0	0	1	0	0	0	0	0	0	0	0					0		0	0
B 20191222 - 75	2019-12-22	11	0	0	0	0	0	0	0	0	0	0	0	0	0	0	0					0		0	0
B 20191222 - 76	2019-12-22	11	2	2	0	0	0	0	0	0	0	0	0	0	0	0	0					0		0	0
B 20191222 - 77	2019-12-22	11	0	0	0	0	0	0	0	0	0	0	0	0	0	0	0					0		0	0
B 20191222 - 78	2019-12-22	11	7	3	0	0	0	0	0	0	3	0	1	0	0	0	0	33.12	Fibers		White	0	1	0	1
B 20191222 - 79	2019-12-22	11	0	0	0	0	0	0	0	0	0	0	0	0	0	0	0					0		0	0
B 20191222 - 80	2019-12-22	11	0	0	0	0	0	0	0	0	0	0	0	0	0	0	0					0		0	0
B 20191222 - 81	2019-12-22	11	0	0	0	0	0	0	0	0	0	0	0	0	0	0	0					0		0	0
B 20191222 - 82	2019-12-22	11	6	5	0	0	0	0	0	0	0	0	0	0	0	0	1					0		0	0
B 20191222 - 83	2019-12-22	11	1	0	0	0	0	0	0	0	1	0	0	0	0	0	0					0		0	0
B 20191222 - 84	2019-12-22	11	0	0	0	0	0	0	0	0	0	0	0	0	0	0	0					0		0	0
B 20191222 - 85	2019-12-22	11	1	1	0	0	0	0	0	0	0	0	0	0	0	0	0					0		0	0
B 20191222 - 86	2019-12-22	11	0	0	0	0	0	0	0	0	0	0	0	0	0	0	0					0		0	0
B 20191222 - 87	2019-12-22	11	6	5	0	0	0	0	0	0	0	0	0	0	0	1	0					0		0	0
B 20191222 - 88	2019-12-22	11	0	0	0	0	0	0	0	0	0	0	0	0	0	0	0					0		0	0
B 20191222 - 89	2019-12-22	11	0	0	0	0	0	0	0	0	0	0	0	0	0	0	0					0		0	0
B 20191222 - 90	2019-12-22	11	0	0	0	0	0	0	0	0	0	0	0	0	0	0	0					0		0	0
B 20200708 - 01	2020-07-08	12	2	2	0	0	0	0	0	0	0	0	0	0	0	0	0					1		0	0
B 20200708 - 02	2020-07-08	12	5	1	0	0	1	0	0	0	3	0	0	0	0	0	0					1		0	0
B 20200708 - 03	2020-07-08	12	1	0	0	1	0	0	0	0	0	0	0	0	0	0	0					1		0	0
B 20200708 - 04	2020-07-08	12	1	0	0	1	0	0	0	0	0	0	0	0	0	0	0					1		0	0
B 20200708 - 05	2020-07-08	12	2	2	0	0	0	0	0	0	0	0	0	0	0	0	0					1		0	0
B 20200708 - 06	2020-07-08	12	1	0	0	0	0	0	0	0	1	0	0	0	0	0	0					1		0	0
B 20200708 - 07	2020-07-08	12	4	4	0	0	0	0	0	0	0	0	0	0	0	0	0					1		0	0
B 20200708 - 08	2020-07-08	12	1	0	0	0	0	0	0	0	0	0	0	1	0	0	0					1		0	0
B 20200708 - 09	2020-07-08	12	0	0	0	0	0	0	0	0	0	0	0	0	0	0	0					1		0	0
B 20200708 - 10	2020-07-08	12	1	1	0	0	0	0	0	0	0	0	0	0	0	0	0					1		0	0
B 20200708 - 11	2020-07-08	12	0	0	0	0	0	0	0	0	0	0	0	0	0	0	0					1		0	0
B 20200722 - 01	2020-07-22	13	4	3	0	0	0	0	0	0	0	0	0	0	0	0	1					1		0	0
B 20200722 - 02	2020-07-22	13	0	0	0	0	0	0	0	0	0	0	0	0	0	0	0					1		0	0
B 20200722 - 03	2020-07-22	13	0	0	0	0	0	0	0	0	0	0	0	0	0	0	0					1		0	0
B 20200722 - 04	2020-07-22	13	2	1	0	0	0	0	1	0	0	0	0	0	0	0	0					1		0	0
B 20200722 - 05	2020-07-22	13	12	11	0	0	0	0	0	0	0	0	0	0	0	0	1					1		0	0
B 20200722 - 06	2020-07-22	13	1	1	0	0	0	0	0	0	0	0	0	0	0	0	0					1		0	0
B 20200722 - 07	2020-07-22	13	1	0	0	0	1	0	0	0	0	0	0	0	0	0	0					1		0	0
B 20200722 - 08	2020-07-22	13	1	0	0	0	0	0	0	0	1	0	0	0	0	0	0					1		0	0
B 20200722 - 09	2020-07-22	13	0	0	0	0	0	0	0	0	0	0	0	0	0	0	0					1		0	0
B 20200722 - 10	2020-07-22	13	0	0	0	0	0	0	0	0	0	0	0	0	0	0	0					1		0	0
B 20200722 - 11	2020-07-22	13	0	0	0	0	0	0	0	0	0	0	0	0	0	0	0					1		0	0
B 20200722 - 12	2020-07-22	13	2	2	0	0	0	0	0	0	0	0	0	0	0	0	0					1		0	0
B 20200722 - 13	2020-07-22	13	0	0	0	0	0	0	0	0	0	0	0	0	0	0	0					1		0	0
B 20200722 - 14	2020-07-22	13	6	4	0	0	0	0	0	0	1	0	0	0	0	0	1					1		0	0
B 20200818 - 01	2020-08-18	14	0	0	0	0	0	0	0	0	0	0	0	0	0	0	0					1		0	0
B 20200818 - 02	2020-08-18	14	3	0	0	0	1	0	0	0	2	0	0	0	0	0	0					1		0	0
B 20200818 - 03	2020-08-18	14	1	0	0	0	1	0	0	0	0	0	0	0	0	0	0					1		0	0
B 20200818 - 04	2020-08-18	14	1	0	0	1	0	0	0	0	0	0	0	0	0	0	0					1		0	0
B 20200818 - 05	2020-08-18	14	4	3	0	0	0	0	0	0	0	0	0	0	0	0	1					1		0	0
B 20200818 - 06	2020-08-18	14	4	1	0	0	0	0	0	0	3	0	0	0	0	0	0					1		0	0
B 20200818 - 07	2020-08-18	14	1	1	0	0	0	0	0	0	0	0	0	0	0	0	0					1		0	0
B 20200818 - 08	2020-08-18	14	2	1	0	0	0	0	0	0	0	0	0	0	0	1	0					1		0	0
B 20200818 - 09	2020-08-18	14	3	1	0	0	0	0	0	0	2	0	0	0	0	0	0					1		0	0
B 20200818 - 10	2020-08-18	14	1	1	0	0	0	0	0	0	0	0	0	0	0	0	0					1		0	0
B 20200818 - 11	2020-08-18	14	1	0	0	0	0	0	0	0	0	0	0	0	0	1	0					1		0	0
B 20200818 - 12	2020-08-18	14	1	0	0	0	0	0	0	0	1	0	0	0	0	0	0					1		0	0
B 20200818 - 13	2020-08-18	14	1	0	0	0	0	0	0	0	1	0	0	0	0	0	0					1		0	0
B 20200818 - 14	2020-08-18	14	4	3	0	0	0	0	0	0	1	0	0	0	0	0	0					1		0	0
B 20200818 - 15	2020-08-18	14	6	6	0	0	0	0	0	0	0	0	0	0	0	0	0					1		0	0
B 20200818 - 16	2020-08-18	14	6	6	0	0	0	0	0	0	0	0	0	0	0	0	0					1		0	0
B 20200818 - 17	2020-08-18	14	5	5	0	0	0	0	0	0	0	0	0	0	0	0	0					1		0	0
B 20200818 - 18	2020-08-18	14	1	0	0	0	0	0	1	0	0	0	0	0	0	0	0					1		0	0
B 20200922 - 01	2020-09-22	15	5	3	0	2	0	0	0	0	0	0	0	0	0	0	0					1		0	0
B 20200922 - 02	2020-09-22	15	13	12	0	0	1	0	0	0	0	0	0	0	0	0	0					1		0	0
B 20200922 - 03	2020-09-22	15	22	22	0	0	0	0	0	0	0	0	0	0	0	0	0					1		0	0
B 20200922 - 04	2020-09-22	15	3	0	0	1	1	0	1	0	0	0	0	0	0	0	0					1		0	0
B 20200922 - 05	2020-09-22	15	11	8	0	1	0	0	0	0	2	0	0	0	0	0	0					1		0	0
B 20200922 - 06	2020-09-22	15	5	0	0	0	0	0	0	0	0	0	0	2	1	2	0					1		0	0
B 20200922 - 07	2020-09-22	15	1	0	0	0	0	0	1	0	0	0	0	0	0	0	0					1		0	0
B 20200922 - 08	2020-09-22	15	1	0	0	0	0	0	1	0	0	0	0	0	0	0	0					1		0	0
B 20200922 - 09	2020-09-22	15	1	0	0	0	0	0	1	0	0	0	0	0	0	0	0					1		0	0
B 20200922 - 10	2020-09-22	15	11	9	0	0	2	0	0	0	0	0	0	0	0	0	0					1		0	0
B 20200922 - 11	2020-09-22	15	6	4	0	0	0	0	0	0	1	0	0	0	0	1	0					1		0	0
B 20200922 - 12	2020-09-22	15	5	3	0	1	1	0	0	0	0	0	0	0	0	0	0					1		0	0
B 20200922 - 13	2020-09-22	15	0	0	0	0	0	0	0	0	0	0	0	0	0	0	0					1		0	0
B 20200922 - 14	2020-09-22	15	4	0	0	0	3	0	0	0	1	0	0	0	0	0	0					1		0	0
B 20200922 - 15	2020-09-22	15	7	0	1	2	0	0	0	0	4	0	0	0	0	0	0					1		0	0
B 20200922 - 16	2020-09-22	15	8	6	1	0	0	0	0	0	1	0	0	0	0	0	0					1		0	0
B 20200922 - 17	2020-09-22	15	4	0	1	0	0	0	0	0	3	0	0	0	0	0	0					1		0	0
B 20200922 - 18	2020-09-22	15	5	5	0	0	0	0	0	0	0	0	0	0	0	0	0					1		0	0
B 20201025 - 01	2020-10-25	16	3	0	1	1	0	0	1	0	0	0	0	0	0	0	0					1		0	0
B 20201025 - 02	2020-10-25	16	15	0	1	0	11	0	2	0	0	0	0	0	0	1	0					1		0	0
B 20201025 - 03	2020-10-25	16	8	0	6	1	0	0	0	0	0	0	0	0	0	0	1					1		0	0
B 20201025 - 04	2020-10-25	16	16	14	0	0	0	0	2	0	0	0	0	0	0	0	0					1		0	0
B 20201025 - 05	2020-10-25	16	9	0	1	0	8	0	0	0	0	0	0	0	0	0	0					1		0	0
B 20201025 - 06	2020-10-25	16	10	4	2	0	0	0	0	0	0	0	0	0	3	0	1					1		0	0
B 20201025 - 07	2020-10-25	16	10	3	2	1	3	0	0	0	0	1	0	0	0	0	0	4.31	Plastic	Threadlike	Red	1		1	1
B 20201025 - 08	2020-10-25	16	4	1	0	0	2	0	1	0	0	0	0	0	0	0	0					1		0	0
B 20201025 - 09	2020-10-25	16	31	10	0	0	0	0	21	0	0	0	0	0	0	0	0					1		0	0
B 20201025 - 10	2020-10-25	16	5	0	1	0	3	0	1	0	0	0	0	0	0	0	0					1		0	0
B 20201025 - 11	2020-10-25	16	6	0	1	0	0	1	4	0	0	0	0	0	0	0	0					1		0	0
B 20201025 - 12	2020-10-25	16	12	6	1	2	0	0	1	0	0	0	0	1	0	0	1					1		0	0
B 20201025 - 13	2020-10-25	16	6	0	2	1	0	0	2	0	0	0	0	0	0	0	1					1		0	0
B 20201025 - 14	2020-10-25	16	20	17	0	0	0	0	3	0	0	0	0	0	0	0	0					1		0	0
B 20201025 - 15	2020-10-25	16	8	0	2	0	6	0	0	0	0	0	0	0	0	0	0					1		0	0
B 20201025 - 16	2020-10-25	16	2	0	0	0	0	1	0	0	0	1	0	0	0	0	0	9.23	Plastic	Threadlike	Red	1		1	1
B 20201025 - 17	2020-10-25	16	6	0	0	4	0	0	2	0	0	0	0	0	0	0	0					1		0	0
B 20201025 - 18	2020-10-25	16	2	0	0	1	1	0	0	0	0	0	0	0	0	0	0					1		0	0
B 20201025 - 19	2020-10-25	16	4	0	1	0	1	0	2	0	0	0	0	0	0	0	0					1		0	0
B 20201025 - 20	2020-10-25	16	6	3	0	0	0	0	3	0	0	0	0	0	0	0	0					1		0	0
B 20201025 - 21	2020-10-25	16	2	0	1	1	0	0	0	0	0	0	0	0	0	0	0					1		0	0
B 20201025 - 22	2020-10-25	16	8	8	0	0	0	0	0	0	0	0	0	0	0	0	0					1		0	0
B 20201025 - 23	2020-10-25	16	4	4	0	0	0	0	0	0	0	0	0	0	0	0	0					1		0	0
B 20201025 - 24	2020-10-25	16	2	0	0	0	0	1	1	0	0	0	0	0	0	0	0					1		0	0
B 20201025 - 25	2020-10-25	16	29	27	0	1	0	0	1	0	0	0	0	0	0	0	0					1		0	0
B 20201025 - 26	2020-10-25	16	3	1	1	0	0	0	1	0	0	0	0	0	0	0	0					1		0	0
B 20201025 - 27	2020-10-25	16	3	0	0	0	1	0	1	0	0	0	1	0	0	0	0	12.68	Fibers		Blue	1	1	0	1
B 20201025 - 28	2020-10-25	16	3	0	0	0	2	0	1	0	0	0	0	0	0	0	0					1		0	0
B 20201025 - 29	2020-10-25	16	4	0	0	0	4	0	0	0	0	0	0	0	0	0	0					1		0	0
B 20201025 - 30	2020-10-25	16	2	1	0	0	1	0	0	0	0	0	0	0	0	0	0					1		0	0
B 20201025 - 31	2020-10-25	16	2	0	0	0	2	0	0	0	0	0	0	0	0	0	0					1		0	0
B 20201025 - 32	2020-10-25	16	1	0	0	0	0	0	1	0	0	0	0	0	0	0	0					1		0	0
B 20201025 - 33	2020-10-25	16	21	19	0	0	0	0	2	0	0	0	0	0	0	0	0					1		0	0
B 20201025 - 34	2020-10-25	16	2	0	0	2	0	0	0	0	0	0	0	0	0	0	0					1		0	0
B 20201025 - 35	2020-10-25	16	7	0	0	0	0	0	0	0	0	0	0	0	7	0	0					1		0	0
B 20201025 - 36	2020-10-25	16	2	2	0	0	0	0	0	0	0	0	0	0	0	0	0					1		0	0
B 20201025 - 37	2020-10-25	16	12	12	0	0	0	0	0	0	0	0	0	0	0	0	0					1		0	0
B 20201025 - 38	2020-10-25	16	1	0	0	0	0	0	1	0	0	0	0	0	0	0	0					1		0	0
B 20201025 - 39	2020-10-25	16	57	52	0	0	0	0	5	0	0	0	0	0	0	0	0					1		0	0
B 20201025 - 40	2020-10-25	16	0	0	0	0	0	0	0	0	0	0	0	0	0	0	0					1		0	0
B 20201025 - 41	2020-10-25	16	3	0	0	0	3	0	0	0	0	0	0	0	0	0	0					1		0	0
B 20201025 - 42	2020-10-25	16	3	1	2	0	0	0	0	0	0	0	0	0	0	0	0					1		0	0
B 20201025 - 43	2020-10-25	16	10	10	0	0	0	0	0	0	0	0	0	0	0	0	0					1		0	0
B 20201025 - 44	2020-10-25	16	0	0	0	0	0	0	0	0	0	0	0	0	0	0	0					1		0	0
B 20201025 - 45	2020-10-25	16	11	10	0	0	1	0	0	0	0	0	0	0	0	0	0					1		0	0
B 20201025 - 46	2020-10-25	16	0	0	0	0	0	0	0	0	0	0	0	0	0	0	0					1		0	0
B 20201025 - 47	2020-10-25	16	4	0	0	2	2	0	0	0	0	0	0	0	0	0	0					1		0	0
B 20201025 - 48	2020-10-25	16	2	0	0	1	1	0	0	0	0	0	0	0	0	0	0					1		0	0
B 20201025 - 49	2020-10-25	16	15	7	0	0	0	1	7	0	0	0	0	0	0	0	0					1		0	0
B 20201025 - 50	2020-10-25	16	1	0	0	0	0	0	1	0	0	0	0	0	0	0	0					1		0	0
B 20201025 - 51	2020-10-25	16	5	0	0	0	1	0	3	0	0	0	0	1	0	0	0					1		0	0
B 20201025 - 52	2020-10-25	16	6	0	3	1	2	0	0	0	0	0	0	0	0	0	0					1		0	0
B 20201025 - 53	2020-10-25	16	12	10	0	0	1	0	1	0	0	0	0	0	0	0	0					1		0	0
B 20201025 - 54	2020-10-25	16	5	3	0	0	2	0	0	0	0	0	0	0	0	0	0					1		0	0
B 20201025 - 55	2020-10-25	16	4	3	0	0	1	0	0	0	0	0	0	0	0	0	0					1		0	0
B 20201025 - 56	2020-10-25	16	6	3	1	0	2	0	0	0	0	0	0	0	0	0	0					1		0	0
B 20201025 - 57	2020-10-25	16	3	2	0	0	1	0	0	0	0	0	0	0	0	0	0					1		0	0
B 20201025 - 58	2020-10-25	16	7	4	3	0	0	0	0	0	0	0	0	0	0	0	0					1		0	0
B 20201025 - 59	2020-10-25	16	2	2	0	0	0	0	0	0	0	0	0	0	0	0	0					1		0	0
B 20201025 - 60	2020-10-25	16	13	10	0	0	3	0	0	0	0	0	0	0	0	0	0					1		0	0
B 20201025 - 61	2020-10-25	16	12	7	4	0	0	0	0	0	0	0	1	0	0	0	0	3.56	Fibers		Red	1	1	0	1
B 20201025 - 62	2020-10-25	16	2	0	0	0	1	0	0	0	0	0	0	1	0	0	0					1		0	0
B 20201025 - 63	2020-10-25	16	6	3	0	1	0	0	0	0	0	0	0	0	0	2	0					1		0	0
B 20201025 - 64	2020-10-25	16	4	0	0	2	0	0	0	0	0	0	0	0	0	0	2					1		0	0
B 20201025 - 65	2020-10-25	16	0	0	0	0	0	0	0	0	0	0	0	0	0	0	0					1		0	0
B 20201025 - 66	2020-10-25	16	14	13	0	1	0	0	0	0	0	0	0	0	0	0	0					1		0	0
B 20201101 - 01	2020-11-01	17	10	10	0	0	0	0	0	0	0	0	0	0	0	0	0					1		0	0
B 20201101 - 02	2020-11-01	17	1	0	0	0	0	0	0	0	0	0	0	1	0	0	0					1		0	0
B 20201101 - 03	2020-11-01	17	8	8	0	0	0	0	0	0	0	0	0	0	0	0	0					1		0	0
B 20201101 - 04	2020-11-01	17	24	24	0	0	0	0	0	0	0	0	0	0	0	0	0					1		0	0
B 20201101 - 05	2020-11-01	17	3	0	0	0	3	0	0	0	0	0	0	0	0	0	0					1		0	0
B 20201101 - 06	2020-11-01	17	14	14	0	0	0	0	0	0	0	0	0	0	0	0	0					1		0	0
B 20201101 - 07	2020-11-01	17	6	1	1	3	0	0	0	0	0	0	0	1	0	0	0					1		0	0
B 20201101 - 08	2020-11-01	17	1	0	1	0	0	0	0	0	0	0	0	0	0	0	0					1		0	0
B 20201101 - 09	2020-11-01	17	4	1	2	0	0	0	0	0	0	0	0	0	0	1	0					1		0	0
B 20201101 - 10	2020-11-01	17	4	0	1	1	2	0	0	0	0	0	0	0	0	0	0					1		0	0
B 20201101 - 11	2020-11-01	17	4	1	0	0	0	1	2	0	0	0	0	0	0	0	0					1		0	0
B 20201101 - 12	2020-11-01	17	13	13	0	0	0	0	0	0	0	0	0	0	0	0	0					1		0	0
B 20201101 - 13	2020-11-01	17	16	16	0	0	0	0	0	0	0	0	0	0	0	0	0					1		0	0
B 20201101 - 14	2020-11-01	17	25	24	0	0	0	1	0	0	0	0	0	0	0	0	0					1		0	0
B 20201101 - 15	2020-11-01	17	2	0	0	1	1	0	0	0	0	0	0	0	0	0	0					1		0	0
B 20201101 - 16	2020-11-01	17	13	13	0	0	0	0	0	0	0	0	0	0	0	0	0					1		0	0
B 20201101 - 17	2020-11-01	17	6	6	0	0	0	0	0	0	0	0	0	0	0	0	0					1		0	0
B 20201101 - 18	2020-11-01	17	0	0	0	0	0	0	0	0	0	0	0	0	0	0	0					1		0	0
B 20201101 - 19	2020-11-01	17	0	0	0	0	0	0	0	0	0	0	0	0	0	0	0					1		0	0
B 20201101 - 20	2020-11-01	17	1	0	1	0	0	0	0	0	0	0	0	0	0	0	0					1		0	0
B 20201101 - 21	2020-11-01	17	2	2	0	0	0	0	0	0	0	0	0	0	0	0	0					1		0	0
B 20201101 - 22	2020-11-01	17	30	30	0	0	0	0	0	0	0	0	0	0	0	0	0					1		0	0
B 20201101 - 23	2020-11-01	17	0	0	0	0	0	0	0	0	0	0	0	0	0	0	0					1		0	0
B 20201101 - 24	2020-11-01	17	1	0	0	0	1	0	0	0	0	0	0	0	0	0	0					1		0	0
B 20201101 - 25	2020-11-01	17	0	0	0	0	0	0	0	0	0	0	0	0	0	0	0					1		0	0
B 20201101 - 26	2020-11-01	17	6	0	0	0	6	0	0	0	0	0	0	0	0	0	0					1		0	0
B 20201101 - 27	2020-11-01	17	5	0	0	0	5	0	0	0	0	0	0	0	0	0	0					1		0	0
B 20201101 - 28	2020-11-01	17	4	0	0	1	0	0	3	0	0	0	0	0	0	0	0					1		0	0
B 20201101 - 29	2020-11-01	17	6	0	4	1	0	0	1	0	0	0	0	0	0	0	0					1		0	0
B 20201101 - 30	2020-11-01	17	7	7	0	0	0	0	0	0	0	0	0	0	0	0	0					1		0	0
B 20201101 - 31	2020-11-01	17	0	0	0	0	0	0	0	0	0	0	0	0	0	0	0					1		0	0
B 20201101 - 32	2020-11-01	17	30	27	0	0	0	0	3	0	0	0	0	0	0	0	0					1		0	0
B 20201101 - 33	2020-11-01	17	4	0	0	4	0	0	0	0	0	0	0	0	0	0	0					1		0	0
B 20201101 - 34	2020-11-01	17	5	5	0	0	0	0	0	0	0	0	0	0	0	0	0					1		0	0
B 20201101 - 35	2020-11-01	17	5	2	0	0	3	0	0	0	0	0	0	0	0	0	0					1		0	0
B 20201101 - 36	2020-11-01	17	0	0	0	0	0	0	0	0	0	0	0	0	0	0	0					1		0	0
B 20201101 - 37	2020-11-01	17	0	0	0	0	0	0	0	0	0	0	0	0	0	0	0					1		0	0
B 20201101 - 38	2020-11-01	17	4	3	0	0	1	0	0	0	0	0	0	0	0	0	0					1		0	0
B 20201101 - 39	2020-11-01	17	4	0	0	4	0	0	0	0	0	0	0	0	0	0	0					1		0	0
B 20201101 - 40	2020-11-01	17	3	1	0	1	1	0	0	0	0	0	0	0	0	0	0					1		0	0
B 20201101 - 41	2020-11-01	17	3	0	0	2	1	0	0	0	0	0	0	0	0	0	0					1		0	0
B 20201101 - 42	2020-11-01	17	2	1	0	0	0	0	0	0	0	0	0	0	0	1	0					1		0	0
B 20201101 - 43	2020-11-01	17	5	0	0	0	0	0	0	0	0	0	0	0	3	2	0					1		0	0
B 20201101 - 44	2020-11-01	17	0	0	0	0	0	0	0	0	0	0	0	0	0	0	0					1		0	0
B 20201101 - 45	2020-11-01	17	17	17	0	0	0	0	0	0	0	0	0	0	0	0	0					1		0	0
B 20201101 - 46	2020-11-01	17	5	0	0	0	5	0	0	0	0	0	0	0	0	0	0					1		0	0
B 20201101 - 47	2020-11-01	17	22	21	0	0	1	0	0	0	0	0	0	0	0	0	0					1		0	0
B 20201101 - 48	2020-11-01	17	10	8	0	0	0	1	1	0	0	0	0	0	0	0	0					1		0	0
B 20201101 - 49	2020-11-01	17	2	0	0	1	1	0	0	0	0	0	0	0	0	0	0					1		0	0
B 20201101 - 50	2020-11-01	17	17	10	0	1	0	0	6	0	0	0	0	0	0	0	0					1		0	0
B 20201101 - 51	2020-11-01	17	1	0	1	0	0	0	0	0	0	0	0	0	0	0	0					1		0	0
B 20201101 - 52	2020-11-01	17	42	42	0	0	0	0	0	0	0	0	0	0	0	0	0					1		0	0
B 20201101 - 53	2020-11-01	17	2	2	0	0	0	0	0	0	0	0	0	0	0	0	0					1		0	0
B 20201101 - 54	2020-11-01	17	20	18	0	0	0	0	2	0	0	0	0	0	0	0	0					1		0	0
B 20201101 - 55	2020-11-01	17	0	0	0	0	0	0	0	0	0	0	0	0	0	0	0					1		0	0
B 20201101 - 56	2020-11-01	17	12	12	0	0	0	0	0	0	0	0	0	0	0	0	0					1		0	0
B 20201101 - 57	2020-11-01	17	10	9	0	0	0	0	1	0	0	0	0	0	0	0	0					1		0	0
B 20201101 - 58	2020-11-01	17	0	0	0	0	0	0	0	0	0	0	0	0	0	0	0					1		0	0
B 20201101 - 59	2020-11-01	17	10	7	0	0	0	0	3	0	0	0	0	0	0	0	0					1		0	0
B 20201101 - 60	2020-11-01	17	5	1	0	0	0	0	3	0	0	1	0	0	0	0	0	9.14	Plastic	Threadlike	Blue	1		1	1
B 20201101 - 61	2020-11-01	17	0	0	0	0	0	0	0	0	0	0	0	0	0	0	0					1		0	0
B 20201101 - 62	2020-11-01	17	5	0	2	1	0	0	0	0	0	0	2	0	0	0	0	39.88/13.35	Fibers		Red	1	1	0	1
B 20201101 - 63	2020-11-01	17	4	0	0	1	3	0	0	0	0	0	0	0	0	0	0					1		0	0
B 20201101 - 64	2020-11-01	17	17	13	0	0	0	0	4	0	0	0	0	0	0	0	0					1		0	0
B 20201101 - 65	2020-11-01	17	0	0	0	0	0	0	0	0	0	0	0	0	0	0	0					1		0	0
B 20201101 - 66	2020-11-01	17	1	0	0	1	0	0	0	0	0	0	0	0	0	0	0					1		0	0
B 20201101 - 67	2020-11-01	17	0	0	0	0	0	0	0	0	0	0	0	0	0	0	0					1		0	0
B 20201101 - 68	2020-11-01	17	4	0	0	1	0	0	0	0	0	0	1	0	0	2	0	2.68	Paint flakes		Red	1	1	0	1
B 20201101 - 69	2020-11-01	17	1	0	0	0	0	1	0	0	0	0	0	0	0	0	0					1		0	0
B 20201101 - 70	2020-11-01	17	8	8	0	0	0	0	0	0	0	0	0	0	0	0	0					1		0	0
B 20201101 - 71	2020-11-01	17	4	4	0	0	0	0	0	0	0	0	0	0	0	0	0					1		0	0
B 20201101 - 72	2020-11-01	17	7	7	0	0	0	0	0	0	0	0	0	0	0	0	0					1		0	0
B 20201101 - 73	2020-11-01	17	16	16	0	0	0	0	0	0	0	0	0	0	0	0	0					1		0	0
B 20201101 - 74	2020-11-01	17	4	4	0	0	0	0	0	0	0	0	0	0	0	0	0					1		0	0
B 20201101 - 75	2020-11-01	17	2	0	0	0	0	0	0	0	1	0	0	0	0	1	0					1		0	0
B 20201101 - 76	2020-11-01	17	0	0	0	0	0	0	0	0	0	0	0	0	0	0	0					1		0	0
B 20201101 - 77	2020-11-01	17	18	18	0	0	0	0	0	0	0	0	0	0	0	0	0					1		0	0
B 20201108 - 01	2020-11-08	18	1	0	0	0	1	0	0	0	0	0	0	0	0	0	0					1		0	0
B 20201108 - 02	2020-11-08	18	3	0	1	0	0	1	0	0	0	0	0	0	0	1	0					1		0	0
B 20201108 - 03	2020-11-08	18	5	0	2	0	3	0	0	0	0	0	0	0	0	0	0					1		0	0
B 20201108 - 04	2020-11-08	18	2	0	0	1	1	0	0	0	0	0	0	0	0	0	0					1		0	0
B 20201108 - 05	2020-11-08	18	2	0	1	0	1	0	0	0	0	0	0	0	0	0	0					1		0	0
B 20201108 - 06	2020-11-08	18	0	0	0	0	0	0	0	0	0	0	0	0	0	0	0					1		0	0
B 20201108 - 07	2020-11-08	18	0	0	0	0	0	0	0	0	0	0	0	0	0	0	0					1		0	0
B 20201108 - 08	2020-11-08	18	6	0	4	1	0	1	0	0	0	0	0	0	0	0	0					1		0	0
B 20201108 - 09	2020-11-08	18	1	0	0	0	0	0	1	0	0	0	0	0	0	0	0					1		0	0
B 20201108 - 10	2020-11-08	18	0	0	0	0	0	0	0	0	0	0	0	0	0	0	0					1		0	0
B 20201108 - 11	2020-11-08	18	10	7	0	0	0	0	3	0	0	0	0	0	0	0	0					1		0	0
B 20201108 - 12	2020-11-08	18	30	30	0	0	0	0	0	0	0	0	0	0	0	0	0					1		0	0
B 20201108 - 13	2020-11-08	18	8	4	3	1	0	0	0	0	0	0	0	0	0	0	0					1		0	0
B 20201108 - 14	2020-11-08	18	0	0	0	0	0	0	0	0	0	0	0	0	0	0	0					1		0	0
B 20201108 - 15	2020-11-08	18	0	0	0	0	0	0	0	0	0	0	0	0	0	0	0					1		0	0
B 20201108 - 16	2020-11-08	18	1	0	0	0	1	0	0	0	0	0	0	0	0	0	0					1		0	0
B 20201108 - 17	2020-11-08	18	1	0	0	0	1	0	0	0	0	0	0	0	0	0	0					1		0	0
B 20201108 - 18	2020-11-08	18	6	4	1	0	1	0	0	0	0	0	0	0	0	0	0					1		0	0
B 20201108 - 19	2020-11-08	18	3	0	0	1	2	0	0	0	0	0	0	0	0	0	0					1		0	0
B 20201108 - 20	2020-11-08	18	5	4	1	0	0	0	0	0	0	0	0	0	0	0	0					1		0	0
B 20201108 - 21	2020-11-08	18	0	0	0	0	0	0	0	0	0	0	0	0	0	0	0					1		0	0
B 20201108 - 22	2020-11-08	18	3	2	1	0	0	0	0	0	0	0	0	0	0	0	0					1		0	0
B 20201108 - 23	2020-11-08	18	6	6	0	0	0	0	0	0	0	0	0	0	0	0	0					1		0	0
B 20201108 - 24	2020-11-08	18	0	0	0	0	0	0	0	0	0	0	0	0	0	0	0					1		0	0
B 20201108 - 25	2020-11-08	18	2	0	0	0	1	0	1	0	0	0	0	0	0	0	0					1		0	0
B 20201108 - 26	2020-11-08	18	1	0	0	0	0	0	0	0	1	0	0	0	0	0	0					1		0	0
B 20201108 - 27	2020-11-08	18	2	0	1	0	1	0	0	0	0	0	0	0	0	0	0					1		0	0
B 20201108 - 28	2020-11-08	18	3	2	0	0	0	1	0	0	0	0	0	0	0	0	0					1		0	0
B 20201108 - 29	2020-11-08	18	1	0	0	0	1	0	0	0	0	0	0	0	0	0	0					1		0	0
B 20201108 - 30	2020-11-08	18	10	10	0	0	0	0	0	0	0	0	0	0	0	0	0					1		0	0
B 20201108 - 31	2020-11-08	18	0	0	0	0	0	0	0	0	0	0	0	0	0	0	0					1		0	0
B 20201108 - 32	2020-11-08	18	2	2	0	0	0	0	0	0	0	0	0	0	0	0	0					1		0	0
B 20201108 - 33	2020-11-08	18	3	3	0	0	0	0	0	0	0	0	0	0	0	0	0					1		0	0
B 20201108 - 34	2020-11-08	18	0	0	0	0	0	0	0	0	0	0	0	0	0	0	0					1		0	0
B 20201108 - 35	2020-11-08	18	5	0	1	0	0	0	0	0	0	0	0	0	3	1	0					1		0	0
B 20201108 - 36	2020-11-08	18	0	0	0	0	0	0	0	0	0	0	0	0	0	0	0					1		0	0
B 20201108 - 37	2020-11-08	18	0	0	0	0	0	0	0	0	0	0	0	0	0	0	0					1		0	0
B 20201108 - 38	2020-11-08	18	2	0	2	0	0	0	0	0	0	0	0	0	0	0	0					1		0	0
B 20201108 - 39	2020-11-08	18	1	0	0	0	0	0	1	0	0	0	0	0	0	0	0					1		0	0
B 20201108 - 40	2020-11-08	18	10	5	4	0	0	0	1	0	0	0	0	0	0	0	0					1		0	0
B 20201108 - 41	2020-11-08	18	3	3	0	0	0	0	0	0	0	0	0	0	0	0	0					1		0	0
B 20201108 - 42	2020-11-08	18	0	0	0	0	0	0	0	0	0	0	0	0	0	0	0					1		0	0
B 20201108 - 43	2020-11-08	18	2	2	0	0	0	0	0	0	0	0	0	0	0	0	0					1		0	0
B 20201108 - 44	2020-11-08	18	0	0	0	0	0	0	0	0	0	0	0	0	0	0	0					1		0	0
B 20201108 - 45	2020-11-08	18	0	0	0	0	0	0	0	0	0	0	0	0	0	0	0					1		0	0
B 20201108 - 46	2020-11-08	18	0	0	0	0	0	0	0	0	0	0	0	0	0	0	0					1		0	0
B 20201108 - 47	2020-11-08	18	0	0	0	0	0	0	0	0	0	0	0	0	0	0	0					1		0	0
B 20201108 - 48	2020-11-08	18	0	0	0	0	0	0	0	0	0	0	0	0	0	0	0					1		0	0
B 20201115 - 01	2020-11-15	19	4	3	0	1	0	0	0	0	0	0	0	0	0	0	0					1		0	0
B 20201115 - 02	2020-11-15	19	2	2	0	0	0	0	0	0	0	0	0	0	0	0	0					1		0	0
B 20201115 - 03	2020-11-15	19	4	4	0	0	0	0	0	0	0	0	0	0	0	0	0					1		0	0
B 20201115 - 04	2020-11-15	19	5	5	0	0	0	0	0	0	0	0	0	0	0	0	0					1		0	0
B 20201115 - 05	2020-11-15	19	0	0	0	0	0	0	0	0	0	0	0	0	0	0	0					1		0	0
B 20201115 - 06	2020-11-15	19	15	15	0	0	0	0	0	0	0	0	0	0	0	0	0					1		0	0
B 20201115 - 07	2020-11-15	19	2	2	0	0	0	0	0	0	0	0	0	0	0	0	0					1		0	0
B 20201115 - 08	2020-11-15	19	10	10	0	0	0	0	0	0	0	0	0	0	0	0	0					1		0	0
B 20201115 - 09	2020-11-15	19	1	1	0	0	0	0	0	0	0	0	0	0	0	0	0					1		0	0
B 20201115 - 10	2020-11-15	19	0	0	0	0	0	0	0	0	0	0	0	0	0	0	0					1		0	0
B 20201115 - 11	2020-11-15	19	9	8	0	1	0	0	0	0	0	0	0	0	0	0	0					1		0	0
B 20201115 - 12	2020-11-15	19	8	8	0	0	0	0	0	0	0	0	0	0	0	0	0					1		0	0
B 20201115 - 13	2020-11-15	19	0	0	0	0	0	0	0	0	0	0	0	0	0	0	0					1		0	0
B 20201115 - 14	2020-11-15	19	0	0	0	0	0	0	0	0	0	0	0	0	0	0	0					1		0	0
B 20201115 - 15	2020-11-15	19	0	0	0	0	0	0	0	0	0	0	0	0	0	0	0					1		0	0
B 20201115 - 16	2020-11-15	19	2	2	0	0	0	0	0	0	0	0	0	0	0	0	0					1		0	0
B 20201115 - 17	2020-11-15	19	0	0	0	0	0	0	0	0	0	0	0	0	0	0	0					1		0	0
B 20201115 - 18	2020-11-15	19	7	4	0	0	0	0	0	0	0	3	0	0	0	0	0	47.06/44.30/56.07	Plastic	Threadlike	Red/Green/Black	1		1	1
B 20201115 - 19	2020-11-15	19	2	0	0	0	2	0	0	0	0	0	0	0	0	0	0					1		0	0
B 20201115 - 20	2020-11-15	19	5	3	1	1	0	0	0	0	0	0	0	0	0	0	0					1		0	0
B 20201115 - 21	2020-11-15	19	0	0	0	0	0	0	0	0	0	0	0	0	0	0	0					1		0	0
B 20201115 - 22	2020-11-15	19	1	0	0	0	1	0	0	0	0	0	0	0	0	0	0					1		0	0
B 20201115 - 23	2020-11-15	19	1	0	0	0	1	0	0	0	0	0	0	0	0	0	0					1		0	0
B 20201115 - 24	2020-11-15	19	2	2	0	0	0	0	0	0	0	0	0	0	0	0	0					1		0	0
B 20201115 - 25	2020-11-15	19	9	8	0	1	0	0	0	0	0	0	0	0	0	0	0					1		0	0
B 20201115 - 26	2020-11-15	19	0	0	0	0	0	0	0	0	0	0	0	0	0	0	0					1		0	0
B 20201115 - 27	2020-11-15	19	0	0	0	0	0	0	0	0	0	0	0	0	0	0	0					1		0	0
B 20201115 - 28	2020-11-15	19	1	1	0	0	0	0	0	0	0	0	0	0	0	0	0					1		0	0
B 20201115 - 29	2020-11-15	19	0	0	0	0	0	0	0	0	0	0	0	0	0	0	0					1		0	0
B 20201115 - 30	2020-11-15	19	2	2	0	0	0	0	0	0	0	0	0	0	0	0	0					1		0	0
B 20201115 - 31	2020-11-15	19	51	51	0	0	0	0	0	0	0	0	0	0	0	0	0					1		0	0
B 20201115 - 32	2020-11-15	19	13	13	0	0	0	0	0	0	0	0	0	0	0	0	0					1		0	0
B 20201115 - 33	2020-11-15	19	0	0	0	0	0	0	0	0	0	0	0	0	0	0	0					1		0	0
B 20201115 - 34	2020-11-15	19	1	0	0	1	0	0	0	0	0	0	0	0	0	0	0					1		0	0
B 20201115 - 35	2020-11-15	19	0	0	0	0	0	0	0	0	0	0	0	0	0	0	0					1		0	0
B 20201115 - 36	2020-11-15	19	0	0	0	0	0	0	0	0	0	0	0	0	0	0	0					1		0	0
B 20201115 - 37	2020-11-15	19	1	0	1	0	0	0	0	0	0	0	0	0	0	0	0					1		0	0
B 20201115 - 38	2020-11-15	19	2	0	0	0	1	0	1	0	0	0	0	0	0	0	0					1		0	0
B 20201115 - 39	2020-11-15	19	0	0	0	0	0	0	0	0	0	0	0	0	0	0	0					1		0	0
B 20201115 - 40	2020-11-15	19	0	0	0	0	0	0	0	0	0	0	0	0	0	0	0					1		0	0
B 20201115 - 41	2020-11-15	19	2	2	0	0	0	0	0	0	0	0	0	0	0	0	0					1		0	0
B 20201115 - 42	2020-11-15	19	0	0	0	0	0	0	0	0	0	0	0	0	0	0	0					1		0	0
B 20201115 - 43	2020-11-15	19	1	0	0	0	1	0	0	0	0	0	0	0	0	0	0					1		0	0
B 20201115 - 44	2020-11-15	19	1	0	0	0	0	0	1	0	0	0	0	0	0	0	0					1		0	0
B 20201115 - 45	2020-11-15	19	2	1	0	1	0	0	0	0	0	0	0	0	0	0	0					1		0	0
B 20201115 - 46	2020-11-15	19	1	0	0	0	1	0	0	0	0	0	0	0	0	0	0					1		0	0
B 20201115 - 47	2020-11-15	19	6	6	0	0	0	0	0	0	0	0	0	0	0	0	0					1		0	0
B 20201122 - 01	2020-11-22	20	3	0	0	1	0	0	0	2	0	0	0	0	0	0	0					1		0	0
B 20201122 - 02	2020-11-22	20	6	2	0	0	0	0	0	0	0	0	0	0	4	0	0					1		0	0
B 20201122 - 03	2020-11-22	20	3	3	0	0	0	0	0	0	0	0	0	0	0	0	0					1		0	0
B 20201122 - 04	2020-11-22	20	3	1	0	2	0	0	0	0	0	0	0	0	0	0	0					1		0	0
B 20201122 - 05	2020-11-22	20	26	26	0	0	0	0	0	0	0	0	0	0	0	0	0					1		0	0
B 20201122 - 06	2020-11-22	20	1	0	0	0	1	0	0	0	0	0	0	0	0	0	0					1		0	0
B 20201122 - 07	2020-11-22	20	15	15	0	0	0	0	0	0	0	0	0	0	0	0	0					1		0	0
B 20201122 - 08	2020-11-22	20	0	0	0	0	0	0	0	0	0	0	0	0	0	0	0					1		0	0
B 20201122 - 09	2020-11-22	20	5	4	0	1	0	0	0	0	0	0	0	0	0	0	0					1		0	0
B 20201122 - 10	2020-11-22	20	2	2	0	0	0	0	0	0	0	0	0	0	0	0	0					1		0	0
B 20201122 - 11	2020-11-22	20	3	3	0	0	0	0	0	0	0	0	0	0	0	0	0					1		0	0
B 20201122 - 12	2020-11-22	20	24	24	0	0	0	0	0	0	0	0	0	0	0	0	0					1		0	0
B 20201122 - 13	2020-11-22	20	23	23	0	0	0	0	0	0	0	0	0	0	0	0	0					1		0	0
B 20201122 - 14	2020-11-22	20	0	0	0	0	0	0	0	0	0	0	0	0	0	0	0					1		0	0
B 20201122 - 15	2020-11-22	20	1	1	0	0	0	0	0	0	0	0	0	0	0	0	0					1		0	0
B 20201122 - 16	2020-11-22	20	40	40	0	0	0	0	0	0	0	0	0	0	0	0	0					1		0	0
B 20201122 - 17	2020-11-22	20	14	14	0	0	0	0	0	0	0	0	0	0	0	0	0					1		0	0
B 20201122 - 18	2020-11-22	20	0	0	0	0	0	0	0	0	0	0	0	0	0	0	0					1		0	0
B 20201122 - 19	2020-11-22	20	2	0	1	0	0	0	0	0	0	1	0	0	0	0	0	5.55	Plastic	Sheetlike	Yellow	1		1	1
B 20201122 - 20	2020-11-22	20	0	0	0	0	0	0	0	0	0	0	0	0	0	0	0					1		0	0
B 20201122 - 21	2020-11-22	20	3	2	0	1	0	0	0	0	0	0	0	0	0	0	0					1		0	0
B 20201122 - 22	2020-11-22	20	7	7	0	0	0	0	0	0	0	0	0	0	0	0	0					1		0	0
B 20201122 - 23	2020-11-22	20	5	5	0	0	0	0	0	0	0	0	0	0	0	0	0					1		0	0
B 20201122 - 24	2020-11-22	20	2	2	0	0	0	0	0	0	0	0	0	0	0	0	0					1		0	0
B 20201122 - 25	2020-11-22	20	1	0	0	0	1	0	0	0	0	0	0	0	0	0	0					1		0	0
B 20201122 - 26	2020-11-22	20	27	27	0	0	0	0	0	0	0	0	0	0	0	0	0					1		0	0
B 20201122 - 27	2020-11-22	20	5	5	0	0	0	0	0	0	0	0	0	0	0	0	0					1		0	0
B 20201122 - 28	2020-11-22	20	1	1	0	0	0	0	0	0	0	0	0	0	0	0	0					1		0	0
B 20201122 - 29	2020-11-22	20	1	0	0	0	0	0	0	0	1	0	0	0	0	0	0					1		0	0
B 20201122 - 30	2020-11-22	20	14	13	0	1	0	0	0	0	0	0	0	0	0	0	0					1		0	0
B 20201122 - 31	2020-11-22	20	6	6	0	0	0	0	0	0	0	0	0	0	0	0	0					1		0	0
B 20201122 - 32	2020-11-22	20	8	8	0	0	0	0	0	0	0	0	0	0	0	0	0					1		0	0
B 20201122 - 33	2020-11-22	20	0	0	0	0	0	0	0	0	0	0	0	0	0	0	0					1		0	0
B 20201122 - 34	2020-11-22	20	7	7	0	0	0	0	0	0	0	0	0	0	0	0	0					1		0	0
B 20201122 - 35	2020-11-22	20	7	7	0	0	0	0	0	0	0	0	0	0	0	0	0					1		0	0
B 20201122 - 36	2020-11-22	20	10	10	0	0	0	0	0	0	0	0	0	0	0	0	0					1		0	0
B 20201122 - 37	2020-11-22	20	0	0	0	0	0	0	0	0	0	0	0	0	0	0	0					1		0	0
B 20201122 - 38	2020-11-22	20	1	0	0	0	0	0	1	0	0	0	0	0	0	0	0					1		0	0
B 20201122 - 39	2020-11-22	20	20	19	0	1	0	0	0	0	0	0	0	0	0	0	0					1		0	0
B 20201122 - 40	2020-11-22	20	9	9	0	0	0	0	0	0	0	0	0	0	0	0	0					1		0	0
B 20201122 - 41	2020-11-22	20	25	25	0	0	0	0	0	0	0	0	0	0	0	0	0					1		0	0
B 20201122 - 42	2020-11-22	20	1	0	0	0	1	0	0	0	0	0	0	0	0	0	0					1		0	0
B 20201129 - 01	2020-11-29	21	1	0	0	0	1	0	0	0	0	0	0	0	0	0	0					1		0	0
B 20201129 - 02	2020-11-29	21	1	0	0	0	1	0	0	0	0	0	0	0	0	0	0					1		0	0
B 20201129 - 03	2020-11-29	21	7	7	0	0	0	0	0	0	0	0	0	0	0	0	0					1		0	0
B 20201129 - 04	2020-11-29	21	1	0	1	0	0	0	0	0	0	0	0	0	0	0	0					1		0	0
B 20201129 - 05	2020-11-29	21	0	0	0	0	0	0	0	0	0	0	0	0	0	0	0					1		0	0
B 20201129 - 06	2020-11-29	21	2	2	0	0	0	0	0	0	0	0	0	0	0	0	0					1		0	0
B 20201129 - 07	2020-11-29	21	4	4	0	0	0	0	0	0	0	0	0	0	0	0	0					1		0	0
B 20201129 - 08	2020-11-29	21	9	0	0	0	0	0	0	0	0	0	0	0	9	0	0					1		0	0
B 20201129 - 09	2020-11-29	21	0	0	0	0	0	0	0	0	0	0	0	0	0	0	0					1		0	0
B 20201129 - 10	2020-11-29	21	3	2	0	0	1	0	0	0	0	0	0	0	0	0	0					1		0	0
B 20201129 - 11	2020-11-29	21	6	5	0	0	0	0	0	0	0	1	0	0	0	0	0	38.81	Plastic	Threadlike	Red	1		1	1
B 20201129 - 12	2020-11-29	21	2	2	0	0	0	0	0	0	0	0	0	0	0	0	0					1		0	0
B 20201129 - 13	2020-11-29	21	1	0	1	0	0	0	0	0	0	0	0	0	0	0	0					1		0	0
B 20201129 - 14	2020-11-29	21	2	0	1	0	0	0	0	0	0	1	0	0	0	0	0	6.99	Plastic	Fragment	Blue	1		1	1
B 20201129 - 15	2020-11-29	21	2	0	1	0	1	0	0	0	0	0	0	0	0	0	0					1		0	0
B 20201129 - 16	2020-11-29	21	3	3	0	0	0	0	0	0	0	0	0	0	0	0	0					1		0	0
B 20201129 - 17	2020-11-29	21	0	0	0	0	0	0	0	0	0	0	0	0	0	0	0					1		0	0
B 20201129 - 18	2020-11-29	21	0	0	0	0	0	0	0	0	0	0	0	0	0	0	0					1		0	0
B 20201129 - 19	2020-11-29	21	2	1	0	0	1	0	0	0	0	0	0	0	0	0	0					1		0	0
B 20201129 - 20	2020-11-29	21	1	0	0	0	1	0	0	0	0	0	0	0	0	0	0					1		0	0
B 20201129 - 21	2020-11-29	21	5	5	0	0	0	0	0	0	0	0	0	0	0	0	0					1		0	0
B 20201129 - 22	2020-11-29	21	15	15	0	0	0	0	0	0	0	0	0	0	0	0	0					1		0	0
B 20201129 - 23	2020-11-29	21	0	0	0	0	0	0	0	0	0	0	0	0	0	0	0					1		0	0
B 20201129 - 24	2020-11-29	21	4	4	0	0	0	0	0	0	0	0	0	0	0	0	0					1		0	0
B 20201129 - 25	2020-11-29	21	12	11	0	0	0	0	0	0	0	0	0	1	0	0	0					1		0	0
B 20201129 - 26	2020-11-29	21	0	0	0	0	0	0	0	0	0	0	0	0	0	0	0					1		0	0
B 20201129 - 27	2020-11-29	21	2	2	0	0	0	0	0	0	0	0	0	0	0	0	0					1		0	0
B 20201129 - 28	2020-11-29	21	1	0	0	0	0	0	1	0	0	0	0	0	0	0	0					1		0	0
B 20201129 - 29	2020-11-29	21	1	0	0	0	1	0	0	0	0	0	0	0	0	0	0					1		0	0
B 20201129 - 30	2020-11-29	21	0	0	0	0	0	0	0	0	0	0	0	0	0	0	0					1		0	0
B 20201129 - 31	2020-11-29	21	5	5	0	0	0	0	0	0	0	0	0	0	0	0	0					1		0	0
B 20201129 - 32	2020-11-29	21	0	0	0	0	0	0	0	0	0	0	0	0	0	0	0					1		0	0
B 20201129 - 33	2020-11-29	21	4	4	0	0	0	0	0	0	0	0	0	0	0	0	0					1		0	0
B 20201129 - 34	2020-11-29	21	0	0	0	0	0	0	0	0	0	0	0	0	0	0	0					1		0	0
B 20201129 - 35	2020-11-29	21	6	0	0	1	0	0	0	0	0	0	0	0	5	0	0					1		0	0
B 20201129 - 36	2020-11-29	21	1	0	0	0	1	0	0	0	0	0	0	0	0	0	0					1		0	0
B 20201129 - 37	2020-11-29	21	6	3	0	0	0	0	0	0	0	0	0	0	3	0	0					1		0	0
B 20201129 - 38	2020-11-29	21	5	5	0	0	0	0	0	0	0	0	0	0	0	0	0					1		0	0
B 20201129 - 39	2020-11-29	21	6	6	0	0	0	0	0	0	0	0	0	0	0	0	0					1		0	0
B 20201129 - 40	2020-11-29	21	1	0	0	0	1	0	0	0	0	0	0	0	0	0	0					1		0	0
B 20201129 - 41	2020-11-29	21	4	0	0	0	0	0	0	0	0	0	0	0	4	0	0					1		0	0
B 20201129 - 42	2020-11-29	21	7	7	0	0	0	0	0	0	0	0	0	0	0	0	0					1		0	0
B 20201129 - 43	2020-11-29	21	7	7	0	0	0	0	0	0	0	0	0	0	0	0	0					1		0	0
B 20201129 - 44	2020-11-29	21	0	0	0	0	0	0	0	0	0	0	0	0	0	0	0					1		0	0
B 20201129 - 45	2020-11-29	21	19	19	0	0	0	0	0	0	0	0	0	0	0	0	0					1		0	0
B 20201129 - 46	2020-11-29	21	1	0	0	0	1	0	0	0	0	0	0	0	0	0	0					1		0	0
B 20201129 - 47	2020-11-29	21	0	0	0	0	0	0	0	0	0	0	0	0	0	0	0					1		0	0
B 20201129 - 48	2020-11-29	21	0	0	0	0	0	0	0	0	0	0	0	0	0	0	0					1		0	0
B 20201129 - 49	2020-11-29	21	1	0	0	1	0	0	0	0	0	0	0	0	0	0	0					1		0	0
B 20201206 - 01	2020-12-06	22	3	3	0	0	0	0	0	0	0	0	0	0	0	0	0					1		0	0
B 20201206 - 02	2020-12-06	22	9	9	0	0	0	0	0	0	0	0	0	0	0	0	0					1		0	0
B 20201206 - 03	2020-12-06	22	5	5	0	0	0	0	0	0	0	0	0	0	0	0	0					1		0	0
B 20201206 - 04	2020-12-06	22	0	0	0	0	0	0	0	0	0	0	0	0	0	0	0					1		0	0
B 20201206 - 05	2020-12-06	22	5	4	0	0	0	0	0	0	0	1	0	0	0	0	0	27.16	Plastic	Threadlike	Green	1		1	1
B 20201206 - 06	2020-12-06	22	1	0	1	0	0	0	0	0	0	0	0	0	0	0	0					1		0	0
B 20201206 - 07	2020-12-06	22	8	8	0	0	0	0	0	0	0	0	0	0	0	0	0					1		0	0
B 20201206 - 08	2020-12-06	22	7	7	0	0	0	0	0	0	0	0	0	0	0	0	0					1		0	0
B 20201206 - 09	2020-12-06	22	1	0	1	0	0	0	0	0	0	0	0	0	0	0	0					1		0	0
B 20201206 - 10	2020-12-06	22	6	6	0	0	0	0	0	0	0	0	0	0	0	0	0					1		0	0
B 20201206 - 11	2020-12-06	22	3	3	0	0	0	0	0	0	0	0	0	0	0	0	0					1		0	0
B 20201206 - 12	2020-12-06	22	5	5	0	0	0	0	0	0	0	0	0	0	0	0	0					1		0	0
B 20201206 - 13	2020-12-06	22	7	0	0	0	0	0	0	0	0	0	0	0	7	0	0					1		0	0
B 20201206 - 14	2020-12-06	22	4	3	1	0	0	0	0	0	0	0	0	0	0	0	0					1		0	0
B 20201206 - 15	2020-12-06	22	4	3	0	0	1	0	0	0	0	0	0	0	0	0	0					1		0	0
B 20201206 - 16	2020-12-06	22	5	5	0	0	0	0	0	0	0	0	0	0	0	0	0					1		0	0
B 20201206 - 17	2020-12-06	22	2	2	0	0	0	0	0	0	0	0	0	0	0	0	0					1		0	0
B 20201206 - 18	2020-12-06	22	5	4	0	1	0	0	0	0	0	0	0	0	0	0	0					1		0	0
B 20201206 - 19	2020-12-06	22	4	4	0	0	0	0	0	0	0	0	0	0	0	0	0					1		0	0
B 20201206 - 20	2020-12-06	22	2	0	0	0	2	0	0	0	0	0	0	0	0	0	0					1		0	0
B 20201206 - 21	2020-12-06	22	2	0	0	0	0	0	0	0	0	2	0	0	0	0	0	14.56/12.78	Plastic	Fragment	Blue/Red	1		1	1
B 20201206 - 22	2020-12-06	22	6	6	0	0	0	0	0	0	0	0	0	0	0	0	0					1		0	0
B 20201206 - 23	2020-12-06	22	4	4	0	0	0	0	0	0	0	0	0	0	0	0	0					1		0	0
B 20201206 - 24	2020-12-06	22	4	4	0	0	0	0	0	0	0	0	0	0	0	0	0					1		0	0
B 20201206 - 25	2020-12-06	22	1	0	0	0	0	0	0	0	0	1	0	0	0	0	0	8.55	Plastic	Fragment	Green	1		1	1
B 20201206 - 26	2020-12-06	22	0	0	0	0	0	0	0	0	0	0	0	0	0	0	0					1		0	0
B 20201206 - 27	2020-12-06	22	0	0	0	0	0	0	0	0	0	0	0	0	0	0	0					1		0	0
B 20201206 - 28	2020-12-06	22	6	6	0	0	0	0	0	0	0	0	0	0	0	0	0					1		0	0
B 20201206 - 29	2020-12-06	22	0	0	0	0	0	0	0	0	0	0	0	0	0	0	0					1		0	0
B 20201206 - 30	2020-12-06	22	1	0	0	0	0	0	0	0	0	0	0	0	0	0	1					1		0	0
B 20201206 - 31	2020-12-06	22	1	0	0	0	0	1	0	0	0	0	0	0	0	0	0					1		0	0
B 20201206 - 32	2020-12-06	22	1	0	0	0	0	0	1	0	0	0	0	0	0	0	0					1		0	0
B 20201206 - 33	2020-12-06	22	4	4	0	0	0	0	0	0	0	0	0	0	0	0	0					1		0	0
B 20201206 - 34	2020-12-06	22	3	3	0	0	0	0	0	0	0	0	0	0	0	0	0					1		0	0
B 20201206 - 35	2020-12-06	22	0	0	0	0	0	0	0	0	0	0	0	0	0	0	0					1		0	0
B 20201206 - 36	2020-12-06	22	0	0	0	0	0	0	0	0	0	0	0	0	0	0	0					1		0	0
B 20201206 - 37	2020-12-06	22	1	0	0	0	0	0	0	0	0	0	0	0	0	0	1					1		0	0
B 20201206 - 38	2020-12-06	22	10	10	0	0	0	0	0	0	0	0	0	0	0	0	0					1		0	0
B 20201206 - 39	2020-12-06	22	6	6	0	0	0	0	0	0	0	0	0	0	0	0	0					1		0	0
B 20201206 - 40	2020-12-06	22	0	0	0	0	0	0	0	0	0	0	0	0	0	0	0					1		0	0
B 20201206 - 41	2020-12-06	22	3	3	0	0	0	0	0	0	0	0	0	0	0	0	0					1		0	0
B 20201206 - 42	2020-12-06	22	7	7	0	0	0	0	0	0	0	0	0	0	0	0	0					1		0	0
B 20201206 - 43	2020-12-06	22	6	6	0	0	0	0	0	0	0	0	0	0	0	0	0					1		0	0
B 20201213 - 01	2020-12-13	23	3	3	0	0	0	0	0	0	0	0	0	0	0	0	0					1		0	0
B 20201213 - 02	2020-12-13	23	10	10	0	0	0	0	0	0	0	0	0	0	0	0	0					1		0	0
B 20201213 - 03	2020-12-13	23	0	0	0	0	0	0	0	0	0	0	0	0	0	0	0					1		0	0
B 20201213 - 04	2020-12-13	23	13	13	0	0	0	0	0	0	0	0	0	0	0	0	0					1		0	0
B 20201213 - 05	2020-12-13	23	1	0	0	0	1	0	0	0	0	0	0	0	0	0	0					1		0	0
B 20201213 - 06	2020-12-13	23	1	0	0	0	0	0	0	0	0	0	1	0	0	0	0	28.33	Fibers		Green	1	1	0	1
B 20201213 - 07	2020-12-13	23	2	2	0	0	0	0	0	0	0	0	0	0	0	0	0					1		0	0
B 20201213 - 08	2020-12-13	23	2	2	0	0	0	0	0	0	0	0	0	0	0	0	0					1		0	0
B 20201213 - 09	2020-12-13	23	0	0	0	0	0	0	0	0	0	0	0	0	0	0	0					1		0	0
B 20201213 - 10	2020-12-13	23	0	0	0	0	0	0	0	0	0	0	0	0	0	0	0					1		0	0
B 20201213 - 11	2020-12-13	23	6	6	0	0	0	0	0	0	0	0	0	0	0	0	0					1		0	0
B 20201213 - 12	2020-12-13	23	0	0	0	0	0	0	0	0	0	0	0	0	0	0	0					1		0	0
B 20201213 - 13	2020-12-13	23	1	0	1	0	0	0	0	0	0	0	0	0	0	0	0					1		0	0
B 20201213 - 14	2020-12-13	23	2	0	1	0	1	0	0	0	0	0	0	0	0	0	0					1		0	0
B 20201213 - 15	2020-12-13	23	0	0	0	0	0	0	0	0	0	0	0	0	0	0	0					1		0	0
B 20201213 - 16	2020-12-13	23	0	0	0	0	0	0	0	0	0	0	0	0	0	0	0					1		0	0
B 20201213 - 17	2020-12-13	23	9	0	0	8	0	0	0	0	0	0	0	0	0	1	0					1		0	0
B 20201213 - 18	2020-12-13	23	12	8	4	0	0	0	0	0	0	0	0	0	0	0	0					1		0	0
B 20201213 - 19	2020-12-13	23	2	2	0	0	0	0	0	0	0	0	0	0	0	0	0					1		0	0
B 20201213 - 20	2020-12-13	23	1	0	0	0	1	0	0	0	0	0	0	0	0	0	0					1		0	0
B 20201213 - 21	2020-12-13	23	1	0	0	1	0	0	0	0	0	0	0	0	0	0	0					1		0	0
B 20201213 - 22	2020-12-13	23	7	7	0	0	0	0	0	0	0	0	0	0	0	0	0					1		0	0
B 20201213 - 23	2020-12-13	23	3	3	0	0	0	0	0	0	0	0	0	0	0	0	0					1		0	0
B 20201213 - 24	2020-12-13	23	0	0	0	0	0	0	0	0	0	0	0	0	0	0	0					1		0	0
B 20201213 - 25	2020-12-13	23	1	0	0	0	1	0	0	0	0	0	0	0	0	0	0					1		0	0
B 20201213 - 26	2020-12-13	23	1	0	0	0	0	0	0	0	1	0	0	0	0	0	0					1		0	0
B 20201213 - 27	2020-12-13	23	0	0	0	0	0	0	0	0	0	0	0	0	0	0	0					1		0	0
B 20201213 - 28	2020-12-13	23	3	2	1	0	0	0	0	0	0	0	0	0	0	0	0					1		0	0
B 20201213 - 29	2020-12-13	23	23	23	0	0	0	0	0	0	0	0	0	0	0	0	0					1		0	0
B 20201213 - 30	2020-12-13	23	0	0	0	0	0	0	0	0	0	0	0	0	0	0	0					1		0	0
B 20201213 - 31	2020-12-13	23	6	6	0	0	0	0	0	0	0	0	0	0	0	0	0					1		0	0
B 20201220 - 01	2020-12-20	24	3	0	1	1	0	0	1	0	0	0	0	0	0	0	0					1		0	0
B 20201220 - 02	2020-12-20	24	10	0	2	0	0	0	0	0	0	0	0	0	7	1	0					1		0	0
B 20201220 - 03	2020-12-20	24	1	0	0	0	0	0	1	0	0	0	0	0	0	0	0					1		0	0
B 20201220 - 04	2020-12-20	24	4	4	0	0	0	0	0	0	0	0	0	0	0	0	0					1		0	0
B 20201220 - 05	2020-12-20	24	4	0	1	0	1	0	1	0	0	0	0	0	0	1	0					1		0	0
B 20201220 - 06	2020-12-20	24	0	0	0	0	0	0	0	0	0	0	0	0	0	0	0					1		0	0
B 20201220 - 07	2020-12-20	24	3	2	0	0	0	0	0	1	0	0	0	0	0	0	0					1		0	0
B 20201220 - 08	2020-12-20	24	2	0	0	0	0	0	0	0	0	0	0	0	2	0	0					1		0	0
B 20201220 - 09	2020-12-20	24	5	5	0	0	0	0	0	0	0	0	0	0	0	0	0					1		0	0
B 20201220 - 10	2020-12-20	24	0	0	0	0	0	0	0	0	0	0	0	0	0	0	0					1		0	0
B 20201220 - 11	2020-12-20	24	4	0	2	1	0	0	0	0	1	0	0	0	0	0	0					1		0	0
B 20201220 - 12	2020-12-20	24	12	9	3	0	0	0	0	0	0	0	0	0	0	0	0					1		0	0
B 20201220 - 13	2020-12-20	24	5	4	1	0	0	0	0	0	0	0	0	0	0	0	0					1		0	0
B 20201220 - 14	2020-12-20	24	1	0	0	0	0	0	1	0	0	0	0	0	0	0	0					1		0	0
B 20201220 - 15	2020-12-20	24	3	3	0	0	0	0	0	0	0	0	0	0	0	0	0					1		0	0
B 20201220 - 16	2020-12-20	24	0	0	0	0	0	0	0	0	0	0	0	0	0	0	0					1		0	0
B 20201220 - 17	2020-12-20	24	3	0	1	0	1	0	1	0	0	0	0	0	0	0	0					1		0	0
B 20201220 - 18	2020-12-20	24	4	3	1	0	0	0	0	0	0	0	0	0	0	0	0					1		0	0
B 20201220 - 19	2020-12-20	24	0	0	0	0	0	0	0	0	0	0	0	0	0	0	0					1		0	0
B 20201220 - 20	2020-12-20	24	0	0	0	0	0	0	0	0	0	0	0	0	0	0	0					1		0	0
B 20201220 - 21	2020-12-20	24	16	16	0	0	0	0	0	0	0	0	0	0	0	0	0					1		0	0
B 20201220 - 22	2020-12-20	24	0	0	0	0	0	0	0	0	0	0	0	0	0	0	0					1		0	0
B 20201220 - 23	2020-12-20	24	3	3	0	0	0	0	0	0	0	0	0	0	0	0	0					1		0	0
B 20201220 - 24	2020-12-20	24	5	5	0	0	0	0	0	0	0	0	0	0	0	0	0					1		0	0
B 20201220 - 25	2020-12-20	24	1	0	0	0	0	1	0	0	0	0	0	0	0	0	0					1		0	0
B 20201220 - 26	2020-12-20	24	0	0	0	0	0	0	0	0	0	0	0	0	0	0	0					1		0	0
B 20201220 - 27	2020-12-20	24	1	0	0	0	0	0	1	0	0	0	0	0	0	0	0					1		0	0
B 20201220 - 28	2020-12-20	24	0	0	0	0	0	0	0	0	0	0	0	0	0	0	0					1		0	0
B 20201220 - 29	2020-12-20	24	2	0	0	0	0	0	0	0	0	0	0	0	0	2	0					1		0	0
B 20210117 - 01	2021-01-17	25	1	0	0	1	0	0	0	0	0	0	0	0	0	0	0					1		0	0
B 20210117 - 02	2021-01-17	25	8	6	0	1	1	0	0	0	0	0	0	0	0	0	0					1		0	0
B 20210117 - 03	2021-01-17	25	4	1	0	2	1	0	0	0	0	0	0	0	0	0	0					1		0	0
B 20210117 - 04	2021-01-17	25	2	2	0	0	0	0	0	0	0	0	0	0	0	0	0					1		0	0
B 20210117 - 05	2021-01-17	25	8	8	0	0	0	0	0	0	0	0	0	0	0	0	0					1		0	0
B 20210117 - 06	2021-01-17	25	0	0	0	0	0	0	0	0	0	0	0	0	0	0	0					1		0	0
B 20210117 - 07	2021-01-17	25	5	3	0	2	0	0	0	0	0	0	0	0	0	0	0					1		0	0
B 20210117 - 08	2021-01-17	25	3	3	0	0	0	0	0	0	0	0	0	0	0	0	0					1		0	0
B 20210117 - 09	2021-01-17	25	2	2	0	0	0	0	0	0	0	0	0	0	0	0	0					1		0	0
B 20210117 - 10	2021-01-17	25	12	12	0	0	0	0	0	0	0	0	0	0	0	0	0					1		0	0
B 20210117 - 11	2021-01-17	25	2	2	0	0	0	0	0	0	0	0	0	0	0	0	0					1		0	0
B 20210117 - 12	2021-01-17	25	1	0	1	0	0	0	0	0	0	0	0	0	0	0	0					1		0	0
B 20210117 - 13	2021-01-17	25	12	12	0	0	0	0	0	0	0	0	0	0	0	0	0					1		0	0
B 20210117 - 14	2021-01-17	25	2	2	0	0	0	0	0	0	0	0	0	0	0	0	0					1		0	0
B 20210124 - 01	2021-01-24	26	12	10	1	0	0	0	0	0	0	1	0	0	0	0	0	12.32	Plastic	Fragment	Pink	1		1	1
B 20210124 - 02	2021-01-24	26	4	4	0	0	0	0	0	0	0	0	0	0	0	0	0					1		0	0
B 20210124 - 03	2021-01-24	26	31	28	1	1	0	0	0	0	0	0	0	0	0	0	1					1		0	0
B 20210124 - 04	2021-01-24	26	10	10	0	0	0	0	0	0	0	0	0	0	0	0	0					1		0	0
B 20210124 - 05	2021-01-24	26	18	16	0	1	0	0	0	0	0	0	1	0	0	0	0	1.61	Paint flakes		Red	1	1	0	1
B 20210124 - 06	2021-01-24	26	3	2	1	0	0	0	0	0	0	0	0	0	0	0	0					1		0	0
B 20210124 - 07	2021-01-24	26	4	4	0	0	0	0	0	0	0	0	0	0	0	0	0					1		0	0
B 20210124 - 08	2021-01-24	26	4	3	0	0	0	0	1	0	0	0	0	0	0	0	0					1		0	0
B 20210124 - 09	2021-01-24	26	5	5	0	0	0	0	0	0	0	0	0	0	0	0	0					1		0	0
B 20210124 - 10	2021-01-24	26	5	5	0	0	0	0	0	0	0	0	0	0	0	0	0					1		0	0
B 20210124 - 11	2021-01-24	26	7	4	0	0	0	0	0	0	0	0	0	0	3	0	0					1		0	0
B 20210124 - 12	2021-01-24	26	2	2	0	0	0	0	0	0	0	0	0	0	0	0	0					1		0	0
B 20210207 - 01	2021-02-07	27	8	8	0	0	0	0	0	0	0	0	0	0	0	0	0					1		0	0
B 20210207 - 02	2021-02-07	27	5	5	0	0	0	0	0	0	0	0	0	0	0	0	0					1		0	0
B 20210207 - 03	2021-02-07	27	7	6	0	0	0	0	0	0	0	1	0	0	0	0	0	7.73	Plastic	Threadlike	Green	1		1	1
B 20210207 - 04	2021-02-07	27	3	2	0	1	0	0	0	0	0	0	0	0	0	0	0					1		0	0
B 20210207 - 05	2021-02-07	27	6	6	0	0	0	0	0	0	0	0	0	0	0	0	0					1		0	0
B 20210207 - 06	2021-02-07	27	3	3	0	0	0	0	0	0	0	0	0	0	0	0	0					1		0	0
B 20210207 - 07	2021-02-07	27	0	0	0	0	0	0	0	0	0	0	0	0	0	0	0					1		0	0
B 20210207 - 08	2021-02-07	27	6	6	0	0	0	0	0	0	0	0	0	0	0	0	0					1		0	0
B 20210207 - 09	2021-02-07	27	5	5	0	0	0	0	0	0	0	0	0	0	0	0	0					1		0	0
B 20210207 - 10	2021-02-07	27	0	0	0	0	0	0	0	0	0	0	0	0	0	0	0					1		0	0
B 20210207 - 11	2021-02-07	27	7	7	0	0	0	0	0	0	0	0	0	0	0	0	0					1		0	0
B 20210207 - 12	2021-02-07	27	0	0	0	0	0	0	0	0	0	0	0	0	0	0	0					1		0	0
B 20210207 - 13	2021-02-07	27	3	3	0	0	0	0	0	0	0	0	0	0	0	0	0					1		0	0
B 20210207 - 14	2021-02-07	27	4	4	0	0	0	0	0	0	0	0	0	0	0	0	0					1		0	0
B 20210207 - 15	2021-02-07	27	4	4	0	0	0	0	0	0	0	0	0	0	0	0	0					1		0	0
B 20210207 - 16	2021-02-07	27	5	5	0	0	0	0	0	0	0	0	0	0	0	0	0					1		0	0
B 20210207 - 17	2021-02-07	27	0	0	0	0	0	0	0	0	0	0	0	0	0	0	0					1		0	0
B 20210207 - 18	2021-02-07	27	13	13	0	0	0	0	0	0	0	0	0	0	0	0	0					1		0	0
B 20210207 - 19	2021-02-07	27	0	0	0	0	0	0	0	0	0	0	0	0	0	0	0					1		0	0
B 20210207 - 20	2021-02-07	27	2	1	0	1	0	0	0	0	0	0	0	0	0	0	0					1		0	0
B 20210207 - 21	2021-02-07	27	17	17	0	0	0	0	0	0	0	0	0	0	0	0	0					1		0	0
B 20210207 - 22	2021-02-07	27	6	6	0	0	0	0	0	0	0	0	0	0	0	0	0					1		0	0
B 20210207 - 23	2021-02-07	27	10	10	0	0	0	0	0	0	0	0	0	0	0	0	0					1		0	0
B 20210207 - 24	2021-02-07	27	13	13	0	0	0	0	0	0	0	0	0	0	0	0	0					1		0	0
B 20210207 - 25	2021-02-07	27	3	3	0	0	0	0	0	0	0	0	0	0	0	0	0					1		0	0
B 20210207 - 26	2021-02-07	27	0	0	0	0	0	0	0	0	0	0	0	0	0	0	0					1		0	0
B 20210207 - 27	2021-02-07	27	16	16	0	0	0	0	0	0	0	0	0	0	0	0	0					1		0	0
B 20210207 - 28	2021-02-07	27	9	9	0	0	0	0	0	0	0	0	0	0	0	0	0					1		0	0
B 20210207 - 29	2021-02-07	27	8	8	0	0	0	0	0	0	0	0	0	0	0	0	0					1		0	0
B 20210207 - 30	2021-02-07	27	8	7	0	0	0	0	1	0	0	0	0	0	0	0	0					1		0	0
B 20210207 - 31	2021-02-07	27	6	6	0	0	0	0	0	0	0	0	0	0	0	0	0					1		0	0
B 20210207 - 32	2021-02-07	27	0	0	0	0	0	0	0	0	0	0	0	0	0	0	0					1		0	0
B 20210207 - 33	2021-02-07	27	27	27	0	0	0	0	0	0	0	0	0	0	0	0	0					1		0	0
B 20210207 - 34	2021-02-07	27	2	2	0	0	0	0	0	0	0	0	0	0	0	0	0					1		0	0
B 20210207 - 35	2021-02-07	27	14	14	0	0	0	0	0	0	0	0	0	0	0	0	0					1		0	0
B 20210214 - 01	2021-02-14	28	0	0	0	0	0	0	0	0	0	0	0	0	0	0	0					1		0	0
B 20210214 - 02	2021-02-14	28	4	0	0	0	0	0	0	4	0	0	0	0	0	0	0					1		0	0
B 20210214 - 03	2021-02-14	28	0	0	0	0	0	0	0	0	0	0	0	0	0	0	0					1		0	0
B 20210214 - 04	2021-02-14	28	12	12	0	0	0	0	0	0	0	0	0	0	0	0	0					1		0	0
B 20210214 - 05	2021-02-14	28	0	0	0	0	0	0	0	0	0	0	0	0	0	0	0					1		0	0
B 20210214 - 06	2021-02-14	28	9	9	0	0	0	0	0	0	0	0	0	0	0	0	0					1		0	0
B 20210214 - 07	2021-02-14	28	0	0	0	0	0	0	0	0	0	0	0	0	0	0	0					1		0	0
B 20210214 - 08	2021-02-14	28	0	0	0	0	0	0	0	0	0	0	0	0	0	0	0					1		0	0
B 20210214 - 09	2021-02-14	28	8	8	0	0	0	0	0	0	0	0	0	0	0	0	0					1		0	0
B 20210214 - 10	2021-02-14	28	0	0	0	0	0	0	0	0	0	0	0	0	0	0	0					1		0	0
B 20210214 - 11	2021-02-14	28	4	4	0	0	0	0	0	0	0	0	0	0	0	0	0					1		0	0
B 20210214 - 12	2021-02-14	28	1	0	0	0	0	0	0	0	0	0	1	0	0	0	0	6.38	Fibers		Blue	1	1	0	1
B 20210214 - 13	2021-02-14	28	14	14	0	0	0	0	0	0	0	0	0	0	0	0	0					1		0	0
B 20210214 - 14	2021-02-14	28	9	8	0	0	0	0	1	0	0	0	0	0	0	0	0					1		0	0
B 20210214 - 15	2021-02-14	28	2	2	0	0	0	0	0	0	0	0	0	0	0	0	0					1		0	0
B 20210214 - 16	2021-02-14	28	0	0	0	0	0	0	0	0	0	0	0	0	0	0	0					1		0	0
B 20210214 - 17	2021-02-14	28	0	0	0	0	0	0	0	0	0	0	0	0	0	0	0					1		0	0
B 20210214 - 18	2021-02-14	28	8	8	0	0	0	0	0	0	0	0	0	0	0	0	0					1		0	0
B 20210214 - 19	2021-02-14	28	12	12	0	0	0	0	0	0	0	0	0	0	0	0	0					1		0	0
B 20210214 - 20	2021-02-14	28	7	7	0	0	0	0	0	0	0	0	0	0	0	0	0					1		0	0
B 20210214 - 21	2021-02-14	28	0	0	0	0	0	0	0	0	0	0	0	0	0	0	0					1		0	0
B 20210214 - 22	2021-02-14	28	0	0	0	0	0	0	0	0	0	0	0	0	0	0	0					1		0	0
B 20210214 - 23	2021-02-14	28	0	0	0	0	0	0	0	0	0	0	0	0	0	0	0					1		0	0
B 20210214 - 24	2021-02-14	28	4	4	0	0	0	0	0	0	0	0	0	0	0	0	0					1		0	0
B 20210214 - 25	2021-02-14	28	0	0	0	0	0	0	0	0	0	0	0	0	0	0	0					1		0	0
B 20210214 - 26	2021-02-14	28	11	11	0	0	0	0	0	0	0	0	0	0	0	0	0					1		0	0
B 20210214 - 27	2021-02-14	28	5	5	0	0	0	0	0	0	0	0	0	0	0	0	0					1		0	0
B 20210214 - 28	2021-02-14	28	7	7	0	0	0	0	0	0	0	0	0	0	0	0	0					1		0	0
B 20210214 - 29	2021-02-14	28	13	13	0	0	0	0	0	0	0	0	0	0	0	0	0					1		0	0
B 20210214 - 30	2021-02-14	28	0	0	0	0	0	0	0	0	0	0	0	0	0	0	0					1		0	0
B 20210214 - 31	2021-02-14	28	1	0	0	0	0	0	1	0	0	0	0	0	0	0	0					1		0	0
B 20210214 - 32	2021-02-14	28	0	0	0	0	0	0	0	0	0	0	0	0	0	0	0					1		0	0
B 20210214 - 33	2021-02-14	28	1	0	0	1	0	0	0	0	0	0	0	0	0	0	0					1		0	0
B 20210214 - 34	2021-02-14	28	0	0	0	0	0	0	0	0	0	0	0	0	0	0	0					1		0	0
B 20210214 - 35	2021-02-14	28	0	0	0	0	0	0	0	0	0	0	0	0	0	0	0					1		0	0
B 20210214 - 36	2021-02-14	28	2	2	0	0	0	0	0	0	0	0	0	0	0	0	0					1		0	0
B 20210214 - 37	2021-02-14	28	2	2	0	0	0	0	0	0	0	0	0	0	0	0	0					1		0	0
B 20210214 - 38	2021-02-14	28	1	0	0	0	0	0	0	0	0	0	0	0	1	0	0					1		0	0
B 20210221 - 01	2021-02-21	29	2	2	0	0	0	0	0	0	0	0	0	0	0	0	0					1		0	0
B 20210221 - 02	2021-02-21	29	5	0	0	0	0	1	0	0	0	0	3	0	1	0	0	26.29/10.58/21.51	Fibers		Pink	1	1	0	1
B 20210221 - 03	2021-02-21	29	1	0	0	0	1	0	0	0	0	0	0	0	0	0	0					1		0	0
B 20210221 - 04	2021-02-21	29	6	4	0	0	0	0	0	0	0	2	0	0	0	0	0	21.7/4.89	Plastic	Threadlike	Green	1		1	1
B 20210221 - 05	2021-02-21	29	0	0	0	0	0	0	0	0	0	0	0	0	0	0	0					1		0	0
B 20210221 - 06	2021-02-21	29	57	0	0	0	0	0	0	0	0	57	0	0	0	0	0	9.02/19.47/20.29/20.29/19.9/5.31/8.95/30.07/14.57/8.1/3.55/6.12/5.26/6.54/10.67/27.88/27.46/9.58/17.49/9.23/11.55/22.69/15.16/6.42/7.35/6.92/22.37/11.47/10.29/13.13/17.08/9.13/40.34/9.48/4.5/12.53/13.53/23.29/10.57/25.85/25.54/19.72/10.08/31.91/18.45/19.9/35.42/8.8/22.12/15.5/15.85/8.01/15.58/22.38/12.01/13.98/14.48/3.28/4.99	Plastic	Threadlike	Red/White/Blue/Black/Translucid	1		1	1
B 20210221 - 07	2021-02-21	29	2	2	0	0	0	0	0	0	0	0	0	0	0	0	0					1		0	0
B 20210221 - 08	2021-02-21	29	1	0	0	0	1	0	0	0	0	0	0	0	0	0	0					1		0	0
B 20210221 - 09	2021-02-21	29	9	9	0	0	0	0	0	0	0	0	0	0	0	0	0					1		0	0
B 20210221 - 10	2021-02-21	29	3	2	0	0	1	0	0	0	0	0	0	0	0	0	0					1		0	0
B 20210221 - 11	2021-02-21	29	6	4	0	0	2	0	0	0	0	0	0	0	0	0	0					1		0	0
B 20210221 - 12	2021-02-21	29	8	7	0	1	0	0	0	0	0	0	0	0	0	0	0					1		0	0
B 20210221 - 13	2021-02-21	29	1	1	0	0	0	0	0	0	0	0	0	0	0	0	0					1		0	0
B 20210221 - 14	2021-02-21	29	5	5	0	0	0	0	0	0	0	0	0	0	0	0	0					1		0	0
B 20210221 - 15	2021-02-21	29	8	7	1	0	0	0	0	0	0	0	0	0	0	0	0					1		0	0
B 20210221 - 16	2021-02-21	29	14	14	0	0	0	0	0	0	0	0	0	0	0	0	0					1		0	0
B 20210221 - 17	2021-02-21	29	2	0	0	2	0	0	0	0	0	0	0	0	0	0	0					1		0	0
B 20210221 - 18	2021-02-21	29	0	0	0	0	0	0	0	0	0	0	0	0	0	0	0					1		0	0
B 20210221 - 19	2021-02-21	29	12	11	0	0	0	0	0	0	0	0	0	0	0	0	1					1		0	0
B 20210221 - 20	2021-02-21	29	6	5	0	0	1	0	0	0	0	0	0	0	0	0	0					1		0	0
B 20210221 - 21	2021-02-21	29	0	0	0	0	0	0	0	0	0	0	0	0	0	0	0					1		0	0
B 20210221 - 22	2021-02-21	29	0	0	0	0	0	0	0	0	0	0	0	0	0	0	0					1		0	0
B 20210221 - 23	2021-02-21	29	3	3	0	0	0	0	0	0	0	0	0	0	0	0	0					1		0	0
B 20210221 - 24	2021-02-21	29	12	12	0	0	0	0	0	0	0	0	0	0	0	0	0					1		0	0
B 20210221 - 25	2021-02-21	29	2	0	0	1	1	0	0	0	0	0	0	0	0	0	0					1		0	0
B 20210221 - 26	2021-02-21	29	1	0	0	0	1	0	0	0	0	0	0	0	0	0	0					1		0	0
B 20210221 - 27	2021-02-21	29	8	6	1	1	0	0	0	0	0	0	0	0	0	0	0					1		0	0
B 20210221 - 28	2021-02-21	29	7	7	0	0	0	0	0	0	0	0	0	0	0	0	0					1		0	0
B 20210221 - 29	2021-02-21	29	3	1	0	0	2	0	0	0	0	0	0	0	0	0	0					1		0	0
B 20210221 - 30	2021-02-21	29	2	0	0	0	0	0	0	0	0	0	2	0	0	0	0	10.8/8.62	Balloon		Orange/Pink	1	1	0	1
B 20210228 - 01	2021-02-28	30	3	3	0	0	0	0	0	0	0	0	0	0	0	0	0					1		0	0
B 20210228 - 02	2021-02-28	30	3	3	0	0	0	0	0	0	0	0	0	0	0	0	0					1		0	0
B 20210228 - 03	2021-02-28	30	19	19	0	0	0	0	0	0	0	0	0	0	0	0	0					1		0	0
B 20210228 - 04	2021-02-28	30	4	3	0	1	0	0	0	0	0	0	0	0	0	0	0					1		0	0
B 20210228 - 05	2021-02-28	30	2	0	0	0	0	0	2	0	0	0	0	0	0	0	0					1		0	0
B 20210228 - 06	2021-02-28	30	2	1	0	1	0	0	0	0	0	0	0	0	0	0	0					1		0	0
B 20210228 - 07	2021-02-28	30	2	2	0	0	0	0	0	0	0	0	0	0	0	0	0					1		0	0
B 20210228 - 08	2021-02-28	30	2	2	0	0	0	0	0	0	0	0	0	0	0	0	0					1		0	0
B 20210228 - 09	2021-02-28	30	0	0	0	0	0	0	0	0	0	0	0	0	0	0	0					1		0	0
B 20210228 - 10	2021-02-28	30	5	4	0	1	0	0	0	0	0	0	0	0	0	0	0					1		0	0
B 20210228 - 11	2021-02-28	30	5	5	0	0	0	0	0	0	0	0	0	0	0	0	0					1		0	0
B 20210228 - 12	2021-02-28	30	2	2	0	0	0	0	0	0	0	0	0	0	0	0	0					1		0	0
B 20210228 - 13	2021-02-28	30	5	4	0	1	0	0	0	0	0	0	0	0	0	0	0					1		0	0
B 20210228 - 14	2021-02-28	30	2	2	0	0	0	0	0	0	0	0	0	0	0	0	0					1		0	0
B 20210228 - 15	2021-02-28	30	61	60	0	0	0	0	0	0	0	1	0	0	0	0	0	4.74	Plastic	Sheetlike	Blue	1		1	1
B 20210228 - 16	2021-02-28	30	1	0	0	1	0	0	0	0	0	0	0	0	0	0	0					1		0	0
B 20210228 - 17	2021-02-28	30	13	13	0	0	0	0	0	0	0	0	0	0	0	0	0					1		0	0
B 20210228 - 18	2021-02-28	30	0	0	0	0	0	0	0	0	0	0	0	0	0	0	0					1		0	0
B 20210228 - 19	2021-02-28	30	8	8	0	0	0	0	0	0	0	0	0	0	0	0	0					1		0	0
B 20210228 - 20	2021-02-28	30	0	0	0	0	0	0	0	0	0	0	0	0	0	0	0					1		0	0
B 20210228 - 21	2021-02-28	30	5	4	0	1	0	0	0	0	0	0	0	0	0	0	0					1		0	0
B 20210228 - 22	2021-02-28	30	0	0	0	0	0	0	0	0	0	0	0	0	0	0	0					1		0	0
B 20210228 - 23	2021-02-28	30	32	32	0	0	0	0	0	0	0	0	0	0	0	0	0					1		0	0
B 20210228 - 24	2021-02-28	30	4	1	0	0	0	0	0	0	0	0	1	0	2	0	0	20.76	Metal		Silver	1	1	0	1
B 20210228 - 25	2021-02-28	30	25	25	0	0	0	0	0	0	0	0	0	0	0	0	0					1		0	0

## Sheet: Plastic classification
Code	Date		Size (mm)	Plastic and non plastic debris classification	Color	Pandemic
B 20181015 - 01	2018-10-15					0
B 20181015 - 02	2018-10-15					0
B 20181015 - 03	2018-10-15					0
B 20181015 - 04	2018-10-15					0
B 20181015 - 05	2018-10-15					0
B 20181015 - 06	2018-10-15					0
B 20181015 - 07	2018-10-15					0
B 20181015 - 08	2018-10-15					0
B 20181015 - 09	2018-10-15					0
B 20181015 - 10	2018-10-15					0
B 20181015 - 11	2018-10-15					0
B 20181015 - 12	2018-10-15					0
B 20181015 - 13	2018-10-15					0
B 20181015 - 14	2018-10-15					0
B 20181015 - 15	2018-10-15					0
B 20181015 - 16	2018-10-15					0
B 20181015 - 17	2018-10-15					0
B 20181015 - 18	2018-10-15					0
B 20181015 - 19	2018-10-15					0
B 20181015 - 20	2018-10-15					0
B 20181015 - 21	2018-10-15					0
B 20181015 - 22	2018-10-15					0
B 20181015 - 23	2018-10-15					0
B 20181015 - 24	2018-10-15		3.17	Sheetlike	Green	0
B 20181015 - 25	2018-10-15					0
B 20181015 - 26	2018-10-15		6.97	Sheetlike	Green	0
B 20181015 - 27	2018-10-15					0
B 20181015 - 28	2018-10-15					0
B 20181015 - 29	2018-10-15					0
B 20181015 - 30	2018-10-15					0
B 20181015 - 31	2018-10-15					0
B 20181015 - 32	2018-10-15					0
B 20181015 - 33	2018-10-15					0
B 20181015 - 34	2018-10-15					0
B 20181015 - 35	2018-10-15					0
B 20181015 - 36	2018-10-15					0
B 20181015 - 37	2018-10-15		2.96	Fragment	Black	0
B 20181015 - 38	2018-10-15					0
B 20181015 - 39	2018-10-15					0
B 20181015 - 40	2018-10-15					0
B 20181015 - 41	2018-10-15					0
B 20181015 - 42	2018-10-15					0
B 20181015 - 43	2018-10-15					0
B 20181015 - 44	2018-10-15					0
B 20181015 - 45	2018-10-15					0
B 20181015 - 46	2018-10-15					0
B 20181015 - 47	2018-10-15					0
B 20181015 - 48	2018-10-15					0
B 20181015 - 49	2018-10-15		8.58	Stone	Black	0
B 20181015 - 50	2018-10-15					0
B 20181015 - 51	2018-10-15					0
B 20181015 - 52	2018-10-15					0
B 20181015 - 53	2018-10-15					0
B 20181015 - 54	2018-10-15					0
B 20181015 - 55	2018-10-15					0
B 20181015 - 56	2018-10-15					0
B 20181015 - 57	2018-10-15					0
B 20181015 - 58	2018-10-15					0
B 20181015 - 59	2018-10-15					0
B 20181015 - 60	2018-10-15					0
B 20181015 - 61	2018-10-15					0
B 20181015 - 62	2018-10-15					0
B 20181015 - 63	2018-10-15					0
B 20181015 - 64	2018-10-15		11.5	Glass	Translucid	0
B 20181015 - 65	2018-10-15					0
B 20181015 - 66	2018-10-15					0
B 20181015 - 67	2018-10-15					0
B 20181015 - 68	2018-10-15					0
B 20181015 - 69	2018-10-15					0
B 20181015 - 70	2018-10-15					0
B 20181015 - 71	2018-10-15					0
B 20181015 - 72	2018-10-15					0
B 20181015 - 73	2018-10-15					0
B 20181015 - 74	2018-10-15					0
B 20181015 - 75	2018-10-15					0
B 20181015 - 76	2018-10-15					0
B 20181015 - 77	2018-10-15					0
B 20181015 - 78	2018-10-15					0
B 20181015 - 79	2018-10-15					0
B 20181015 - 80	2018-10-15		11.77	Processed wood	Brown	0
B 20181015 - 81	2018-10-15					0
B 20181015 - 82	2018-10-15					0
B 20181015 - 83	2018-10-15					0
B 20181015 - 84	2018-10-15					0
B 20181015 - 85	2018-10-15					0
B 20181015 - 86	2018-10-15					0
B 20181015 - 87	2018-10-15					0
B 20181015 - 88	2018-10-15					0
B 20181015 - 89	2018-10-15					0
B 20181015 - 90	2018-10-15					0
B 20181015 - 91	2018-10-15					0
B 20181015 - 92	2018-10-15					0
B 20181015 - 93	2018-10-15					0
B 20181015 - 94	2018-10-15					0
B 20181015 - 95	2018-10-15					0
B 20181015 - 96	2018-10-15					0
B 20181015 - 97	2018-10-15					0
B 20181015 - 98	2018-10-15					0
B 20181015 - 99	2018-10-15					0
B 20181015 - 100	2018-10-15					0
B 20181015 - 101	2018-10-15					0
B 20181015 - 102	2018-10-15					0
B 20181015 - 103	2018-10-15					0
B 20181015 - 104	2018-10-15					0
B 20181015 - 105	2018-10-15					0
B 20181015 - 106	2018-10-15		7.7	Glass	Translucid	0
B 20181015 - 107	2018-10-15					0
B 20181015 - 108	2018-10-15					0
B 20181015 - 109	2018-10-15					0
B 20181015 - 110	2018-10-15					0
B 20181015 - 111	2018-10-15		7.69	Sheetlike	Translucid	0
B 20181015 - 112	2018-10-15		18.57	Threadlike	Violet	0
B 20181015 - 113	2018-10-15		29.64	Threadlike	Violet	0
B 20181015 - 114	2018-10-15					0
B 20181015 - 115	2018-10-15					0
B 20181015 - 116	2018-10-15					0
B 20181015 - 117	2018-10-15					0
B 20181015 - 118	2018-10-15					0
B 20181015 - 119	2018-10-15					0
B 20181015 - 120	2018-10-15					0
B 20181015 - 121	2018-10-15		5.9	Stone	Brown	0
B 20181015 - 122	2018-10-15					0
B 20181015 - 123	2018-10-15					0
B 20181015 - 124	2018-10-15					0
B 20181015 - 125	2018-10-15					0
B 20181015 - 126	2018-10-15					0
B 20181015 - 127	2018-10-15					0
B 20181015 - 128	2018-10-15					0
B 20181015 - 129	2018-10-15					0
B 20181015 - 130	2018-10-15					0
B 20181015 - 131	2018-10-15					0
B 20181015 - 132	2018-10-15					0
B 20181015 - 133	2018-10-15					0
B 20181015 - 134	2018-10-15					0
B 20181015 - 135	2018-10-15					0
B 20181015 - 136	2018-10-15					0
B 20181015 - 137	2018-10-15		6.2	Metal	Silver	0
B 20181015 - 138	2018-10-15					0
B 20181121 - 01	2018-11-21					0
B 20181121 - 02	2018-11-21					0
B 20181121 - 03	2018-11-21					0
B 20181121 - 04	2018-11-21					0
B 20181121 - 05	2018-11-21					0
B 20181121 - 06	2018-11-21					0
B 20181121 - 07	2018-11-21					0
B 20181121 - 08	2018-11-21					0
B 20181121 - 09	2018-11-21					0
B 20181121 - 10	2018-11-21					0
B 20181121 - 11	2018-11-21					0
B 20181121 - 12	2018-11-21					0
B 20181121 - 13	2018-11-21					0
B 20181121 - 14	2018-11-21					0
B 20181121 - 15	2018-11-21					0
B 20181121 - 16	2018-11-21					0
B 20181121 - 17	2018-11-21					0
B 20181121 - 18	2018-11-21					0
B 20181121 - 19	2018-11-21					0
B 20181121 - 20	2018-11-21		9.26	Natural wood	Brown	0
B 20181121 - 20	2018-11-21		12.41	Natural wood		0
B 20181121 - 21	2018-11-21					0
B 20181121 - 22	2018-11-21					0
B 20181121 - 23	2018-11-21					0
B 20181121 - 24	2018-11-21					0
B 20181121 - 25	2018-11-21					0
B 20181121 - 26	2018-11-21					0
B 20181121 - 27	2018-11-21		29.6	Threadlike	White	0
B 20181121 - 28	2018-11-21					0
B 20181121 - 29	2018-11-21		5.12	Fragment	Red	0
B 20181121 - 30	2018-11-21					0
B 20181121 - 31	2018-11-21					0
B 20181121 - 32	2018-11-21					0
B 20181121 - 33	2018-11-21		11.53	Stone	Brown/Red	0
B 20181121 - 33	2018-11-21		1.97	Fibers
B 20181121 - 34	2018-11-21					0
B 20181121 - 35	2018-11-21					0
B 20181121 - 36	2018-11-21		6.64	Natural wood	Brown	0
B 20181121 - 37	2018-11-21					0
B 20181121 - 38	2018-11-21					0
B 20181121 - 39	2018-11-21		26.91	Natural wood	Brown	0
B 20181121 - 40	2018-11-21					0
B 20181121 - 41	2018-11-21		14.97	Threadlike	White	0
B 20181121 - 42	2018-11-21					0
B 20181121 - 43	2018-11-21					0
B 20181121 - 44	2018-11-21					0
B 20181121 - 45	2018-11-21					0
B 20181121 - 46	2018-11-21					0
B 20181121 - 47	2018-11-21					0
B 20181121 - 48	2018-11-21		15.37	Algae	Brown	0
B 20181121 - 49	2018-11-21					0
B 20181121 - 50	2018-11-21					0
B 20181121 - 51	2018-11-21					0
B 20181121 - 52	2018-11-21					0
B 20181121 - 53	2018-11-21		10.99	Natural wood	Brown	0
B 20181121 - 54	2018-11-21					0
B 20181121 - 55	2018-11-21					0
B 20181121 - 56	2018-11-21					0
B 20181121 - 57	2018-11-21					0
B 20181121 - 58	2018-11-21					0
B 20181121 - 59	2018-11-21					0
B 20181121 - 60	2018-11-21		2.5	Stone	Grey	0
B 20181121 - 61	2018-11-21					0
B 20181121 - 62	2018-11-21					0
B 20181121 - 63	2018-11-21					0
B 20181121 - 64	2018-11-21		5.25	Sheetlike	Blue	0
B 20181121 - 65	2018-11-21		3.71	Sheetlike	Red	0
B 20181121 - 66	2018-11-21					0
B 20181121 - 67	2018-11-21					0
B 20181121 - 68	2018-11-21					0
B 20181121 - 69	2018-11-21					0
B 20181121 - 70	2018-11-21		38.42	Sheetlike/Fibers	Red	0
B 20181121 - 70	2018-11-21		1.42	Sheetlike/Fibers	Red	0
B 20181121 - 70	2018-11-21		3.53	Sheetlike/Fibers	Red	0
B 20181121 - 70	2018-11-21		7.61	Sheetlike/Fibers	Red	0
B 20181121 - 71	2018-11-21					0
B 20181121 - 72	2018-11-21					0
B 20181121 - 73	2018-11-21					0
B 20181121 - 74	2018-11-21					0
B 20181121 - 75	2018-11-21					0
B 20181121 - 76	2018-11-21					0
B 20181121 - 77	2018-11-21					0
B 20181121 - 78	2018-11-21					0
B 20181121 - 79	2018-11-21		5.49	Sheetlike / Threadlike / Fragment	Yellow / Green / Red	0
B 20181121 - 79	2018-11-21		6.6	Sheetlike / Threadlike / Fragment	Yellow / Green / Red	0
B 20181121 - 79	2018-11-21		9.97	Sheetlike / Threadlike / Fragment	Yellow / Green / Red	0
B 20181121 - 79	2018-11-21		6.39	Sheetlike / Threadlike / Fragment	Yellow / Green / Red	0
B 20181121 - 79	2018-11-21		7.3	Sheetlike / Threadlike / Fragment	Yellow / Green / Red	0
B 20181121 - 79	2018-11-21		4.6	Sheetlike / Threadlike / Fragment	Yellow / Green / Red	0
B 20181121 - 79	2018-11-21		3.49	Sheetlike / Threadlike / Fragment	Yellow / Green / Red	0
B 20181121 - 80	2018-11-21		24.59	Sheetlike	Translucid	0
B 20181121 - 81	2018-11-21					0
B 20181121 - 82	2018-11-21					0
B 20181121 - 83	2018-11-21					0
B 20181121 - 84	2018-11-21					0
B 20181121 - 85	2018-11-21					0
B 20181121 - 86	2018-11-21					0
B 20181121 - 87	2018-11-21					0
B 20181121 - 88	2018-11-21					0
B 20181121 - 89	2018-11-21		16	Pavement	Yellow	0
B 20181121 - 90	2018-11-21					0
B 20181121 - 91	2018-11-21					0
B 20181121 - 92	2018-11-21					0
B 20181121 - 93	2018-11-21					0
B 20181121 - 94	2018-11-21					0
B 20181121 - 95	2018-11-21					0
B 20181121 - 96	2018-11-21					0
B 20181121 - 97	2018-11-21					0
B 20181121 - 98	2018-11-21					0
B 20181121 - 99	2018-11-21					0
B 20181121 - 100	2018-11-21					0
B 20181121 - 101	2018-11-21					0
B 20181121 - 102	2018-11-21		30.67	Threadlike	Black	0
B 20181121 - 102	2018-11-21		59	Threadlike	Black	0
B 20181121 - 103	2018-11-21					0
B 20181121 - 104	2018-11-21					0
B 20181121 - 105	2018-11-21					0
B 20181121 - 106	2018-11-21		12.85	Threadlike	Translucid	0
B 20181121 - 107	2018-11-21					0
B 20181121 - 108	2018-11-21					0
B 20181121 - 109	2018-11-21					0
B 20181121 - 110	2018-11-21					0
B 20181121 - 111	2018-11-21					0
B 20181121 - 112	2018-11-21					0
B 20181121 - 113	2018-11-21					0
B 20181121 - 114	2018-11-21					0
B 20181121 - 115	2018-11-21					0
B 20181121 - 116	2018-11-21					0
B 20181121 - 117	2018-11-21		35.51	Natural wood		0
B 20181121 - 118	2018-11-21					0
B 20181121 - 119	2018-11-21		7.49	Sheetlike	Blue	0
B 20181121 - 120	2018-11-21					0
B 20181121 - 121	2018-11-21					0
B 20181121 - 122	2018-11-21					0
B 20181121 - 123	2018-11-21					0
B 20181121 - 124	2018-11-21					0
B 20181121 - 125	2018-11-21					0
B 20181121 - 126	2018-11-21					0
B 20181121 - 127	2018-11-21					0
B 20181121 - 128	2018-11-21					0
B 20181121 - 129	2018-11-21					0
B 20181121 - 130	2018-11-21					0
B 20181121 - 131	2018-11-21					0
B 20181121 - 132	2018-11-21					0
B 20181121 - 133	2018-11-21					0
B 20181121 - 134	2018-11-21					0
B 20181121 - 135	2018-11-21					0
B 20181121 - 136	2018-11-21					0
B 20181121 - 137	2018-11-21					0
B 20181121 - 138	2018-11-21					0
B 20181219 - 01	2018-12-19					0
B 20181219 - 02	2018-12-19					0
B 20181219 - 03	2018-12-19					0
B 20181219 - 04	2018-12-19					0
B 20181219 - 05	2018-12-19					0
B 20181219 - 06	2018-12-19					0
B 20181219 - 07	2018-12-19					0
B 20181219 - 08	2018-12-19					0
B 20181219 - 09	2018-12-19					0
B 20181219 - 10	2018-12-19					0
B 20181219 - 11	2018-12-19					0
B 20181219 - 12	2018-12-19		15.69	Natural wood	Brown	0
B 20181219 - 12	2018-12-19		5.3	Natural wood	Brown	0
B 20181219 - 13	2018-12-19					0
B 20181219 - 14	2018-12-19					0
B 20181219 - 15	2018-12-19					0
B 20181219 - 16	2018-12-19					0
B 20181219 - 17	2018-12-19					0
B 20181219 - 18	2018-12-19					0
B 20181219 - 19	2018-12-19					0
B 20181219 - 20	2018-12-19					0
B 20181219 - 21	2018-12-19					0
B 20181219 - 22	2018-12-19					0
B 20181219 - 23	2018-12-19					0
B 20181219 - 24	2018-12-19					0
B 20181219 - 25	2018-12-19		1.4	Sheetlike	Yellow	0
B 20181219 - 26	2018-12-19					0
B 20181219 - 27	2018-12-19					0
B 20181219 - 28	2018-12-19					0
B 20181219 - 29	2018-12-19					0
B 20181219 - 30	2018-12-19					0
B 20181219 - 31	2018-12-19					0
B 20181219 - 32	2018-12-19					0
B 20181219 - 33	2018-12-19					0
B 20181219 - 34	2018-12-19					0
B 20181219 - 35	2018-12-19					0
B 20181219 - 36	2018-12-19					0
B 20181219 - 37	2018-12-19					0
B 20181219 - 38	2018-12-19					0
B 20181219 - 39	2018-12-19					0
B 20181219 - 40	2018-12-19					0
B 20181219 - 41	2018-12-19					0
B 20181219 - 42	2018-12-19					0
B 20181219 - 43	2018-12-19		4.82	Glass	Translucid	0
B 20181219 - 44	2018-12-19					0
B 20181219 - 45	2018-12-19					0
B 20181219 - 46	2018-12-19					0
B 20181219 - 47	2018-12-19					0
B 20181219 - 48	2018-12-19					0
B 20181219 - 49	2018-12-19					0
B 20181219 - 50	2018-12-19					0
B 20181219 - 51	2018-12-19					0
B 20181219 - 52	2018-12-19					0
B 20181219 - 53	2018-12-19					0
B 20181219 - 54	2018-12-19					0
B 20181219 - 55	2018-12-19					0
B 20181219 - 56	2018-12-19					0
B 20181219 - 57	2018-12-19					0
B 20181219 - 58	2018-12-19					0
B 20181219 - 59	2018-12-19					0
B 20181219 - 60	2018-12-19					0
B 20181219 - 61	2018-12-19					0
B 20181219 - 62	2018-12-19					0
B 20181219 - 63	2018-12-19					0
B 20181219 - 64	2018-12-19					0
B 20181219 - 65	2018-12-19					0
B 20181219 - 66	2018-12-19		3.76	Threadlike	Yellow	0
B 20181219 - 67	2018-12-19					0
B 20181219 - 68	2018-12-19					0
B 20181219 - 69	2018-12-19					0
B 20181219 - 70	2018-12-19		14.4	Sheetlike	Brown/Blue	0
B 20181219 - 70	2018-12-19		8.48	Sheetlike	Brown/Blue	0
B 20181219 - 70	2018-12-19		8.43	Sheetlike	Brown/Blue	0
B 20181219 - 70	2018-12-19		3.67	Sheetlike	Brown/Blue	0
B 20181219 - 71	2018-12-19					0
B 20181219 - 72	2018-12-19					0
B 20181219 - 73	2018-12-19					0
B 20181219 - 74	2018-12-19		13.73	Threadlike	Translucid	0
B 20181219 - 75	2018-12-19					0
B 20181219 - 76	2018-12-19					0
B 20181219 - 77	2018-12-19					0
B 20181219 - 78	2018-12-19					0
B 20181219 - 79	2018-12-19					0
B 20181219 - 80	2018-12-19					0
B 20181219 - 81	2018-12-19					0
B 20181219 - 82	2018-12-19					0
B 20181219 - 83	2018-12-19					0
B 20181219 - 84	2018-12-19					0
B 20181219 - 85	2018-12-19					0
B 20181219 - 86	2018-12-19					0
B 20181219 - 87	2018-12-19					0
B 20181219 - 88	2018-12-19					0
B 20181219 - 89	2018-12-19					0
B 20181219 - 90	2018-12-19					0
B 20181219 - 91	2018-12-19					0
B 20181219 - 92	2018-12-19					0
B 20181219 - 93	2018-12-19					0
B 20181219 - 94	2018-12-19					0
B 20181219 - 95	2018-12-19					0
B 20190122 - 01	2019-01-22					0
B 20190122 - 02	2019-01-22					0
B 20190122 - 03	2019-01-22		3.94	Fragment	Black	0
B 20190122 - 04	2019-01-22					0
B 20190122 - 05	2019-01-22					0
B 20190122 - 06	2019-01-22					0
B 20190122 - 07	2019-01-22					0
B 20190122 - 08	2019-01-22		17.9	Processed wood	Brown	0
B 20190122 - 09	2019-01-22					0
B 20190122 - 10	2019-01-22					0
B 20190122 - 11	2019-01-22					0
B 20190122 - 12	2019-01-22					0
B 20190122 - 13	2019-01-22					0
B 20190122 - 14	2019-01-22					0
B 20190122 - 15	2019-01-22					0
B 20190219 - 01	2019-02-19		10.41	Processed wood	Grey	0
B 20190219 - 02	2019-02-19					0
B 20190219 - 03	2019-02-19					0
B 20190219 - 04	2019-02-19					0
B 20190219 - 05	2019-02-19					0
B 20190219 - 06	2019-02-19					0
B 20190219 - 07	2019-02-19					0
B 20190219 - 08	2019-02-19					0
B 20190219 - 09	2019-02-19					0
B 20190219 - 10	2019-02-19					0
B 20190219 - 11	2019-02-19					0
B 20190722 - 01	2019-07-22					0
B 20190722 - 02	2019-07-22		137.81	Threadlike	Translucid	0
B 20190722 - 03	2019-07-22					0
B 20190722 - 04	2019-07-22					0
B 20190722 - 05	2019-07-22					0
B 20190722 - 06	2019-07-22					0
B 20190722 - 07	2019-07-22					0
B 20190722 - 08	2019-07-22					0
B 20190722 - 09	2019-07-22					0
B 20190722 - 10	2019-07-22					0
B 20190722 - 11	2019-07-22					0
B 20190722 - 12	2019-07-22		9.05	Leaf	Opaque	0
B 20190722 - 13	2019-07-22					0
B 20190722 - 14	2019-07-22					0
B 20190722 - 15	2019-07-22					0
B 20190722 - 16	2019-07-22					0
B 20190722 - 17	2019-07-22					0
B 20190722 - 18	2019-07-22					0
B 20190722 - 19	2019-07-22					0
B 20190722 - 20	2019-07-22					0
B 20190722 - 21	2019-07-22					0
B 20190722 - 22	2019-07-22					0
B 20190722 - 23	2019-07-22					0
B 20190722 - 24	2019-07-22					0
B 20190722 - 25	2019-07-22					0
B 20190722 - 26	2019-07-22					0
B 20190722 - 27	2019-07-22		4.47	Fragment	Blue	0
B 20190722 - 27	2019-07-22		3.95	Fragment	Blue	0
B 20190722 - 28	2019-07-22					0
B 20190722 - 29	2019-07-22		2.57	Fragment	Red	0
B 20190722 - 30	2019-07-22					0
B 20190722 - 31	2019-07-22		9.88	Leaf	Opaque	0
B 20190722 - 32	2019-07-22					0
B 20190722 - 33	2019-07-22					0
B 20190722 - 34	2019-07-22					0
B 20190722 - 35	2019-07-22					0
B 20190722 - 36	2019-07-22					0
B 20190722 - 37	2019-07-22					0
B 20190722 - 38	2019-07-22					0
B 20190722 - 39	2019-07-22					0
B 20190722 - 40	2019-07-22					0
B 20190722 - 41	2019-07-22					0
B 20190722 - 42	2019-07-22					0
B 20190722 - 43	2019-07-22					0
B 20190722 - 44	2019-07-22					0
B 20190722 - 45	2019-07-22					0
B 20190722 - 46	2019-07-22					0
B 20190722 - 47	2019-07-22					0
B 20190722 - 48	2019-07-22					0
B 20190722 - 49	2019-07-22		19.54	Unidentified	Black y Brown	0
B 20190722 - 50	2019-07-22					0
B 20190722 - 51	2019-07-22					0
B 20190722 - 52	2019-07-22					0
B 20190722 - 53	2019-07-22					0
B 20190722 - 54	2019-07-22					0
B 20190722 - 55	2019-07-22					0
B 20190722 - 56	2019-07-22		11.4	Natural wood	Brown	0
B 20190722 - 57	2019-07-22					0
B 20190722 - 58	2019-07-22		13.64	Metal	Silver	0
B 20190722 - 59	2019-07-22					0
B 20190722 - 60	2019-07-22					0
B 20190722 - 61	2019-07-22					0
B 20190722 - 62	2019-07-22					0
B 20190722 - 63	2019-07-22					0
B 20190722 - 64	2019-07-22					0
B 20190722 - 65	2019-07-22					0
B 20190722 - 66	2019-07-22					0
B 20190722 - 67	2019-07-22					0
B 20190722 - 68	2019-07-22					0
B 20190722 - 69	2019-07-22					0
B 20190722 - 70	2019-07-22					0
B 20190722 - 71	2019-07-22					0
B 20190722 - 72	2019-07-22					0
B 20190722 - 73	2019-07-22					0
B 20190722 - 74	2019-07-22					0
B 20190722 - 75	2019-07-22					0
B 20190722 - 76	2019-07-22					0
B 20190722 - 77	2019-07-22					0
B 20190823 - 01	2019-08-23					0
B 20190823 - 02	2019-08-23					0
B 20190823 - 03	2019-08-23					0
B 20190823 - 04	2019-08-23					0
B 20190823 - 05	2019-08-23					0
B 20190823 - 06	2019-08-23					0
B 20190823 - 07	2019-08-23					0
B 20190823 - 08	2019-08-23					0
B 20190823 - 09	2019-08-23					0
B 20190823 - 10	2019-08-23					0
B 20190823 - 11	2019-08-23					0
B 20190823 - 12	2019-08-23					0
B 20190823 - 13	2019-08-23					0
B 20190823 - 14	2019-08-23					0
B 20190823 - 15	2019-08-23					0
B 20190823 - 16	2019-08-23		32.36	Natural wood	Brown	0
B 20190823 - 17	2019-08-23					0
B 20190823 - 18	2019-08-23					0
B 20190823 - 19	2019-08-23					0
B 20190823 - 20	2019-08-23					0
B 20190823 - 21	2019-08-23					0
B 20190823 - 22	2019-08-23					0
B 20190823 - 23	2019-08-23					0
B 20190823 - 24	2019-08-23					0
B 20190823 - 25	2019-08-23					0
B 20190823 - 26	2019-08-23					0
B 20190823 - 27	2019-08-23					0
B 20190823 - 28	2019-08-23					0
B 20190823 - 29	2019-08-23					0
B 20190823 - 30	2019-08-23					0
B 20190823 - 31	2019-08-23		6.66	Fragment	Black	0
B 20190823 - 32	2019-08-23					0
B 20190823 - 33	2019-08-23		19.92	Threadlike	Blue	0
B 20190823 - 34	2019-08-23					0
B 20190823 - 35	2019-08-23					0
B 20190823 - 36	2019-08-23					0
B 20190823 - 37	2019-08-23					0
B 20190823 - 38	2019-08-23		8.88	Natural wood	Brown	0
B 20190823 - 39	2019-08-23					0
B 20190823 - 40	2019-08-23					0
B 20190823 - 41	2019-08-23					0
B 20190823 - 42	2019-08-23					0
B 20190823 - 43	2019-08-23					0
B 20190823 - 44	2019-08-23					0
B 20190823 - 45	2019-08-23					0
B 20190823 - 46	2019-08-23					0
B 20190823 - 47	2019-08-23					0
B 20190823 - 48	2019-08-23					0
B 20190823 - 49	2019-08-23					0
B 20190823 - 50	2019-08-23					0
B 20190823 - 51	2019-08-23					0
B 20190823 - 52	2019-08-23		5.18	Natural wood	Brown	0
B 20190823 - 53	2019-08-23					0
B 20190823 - 54	2019-08-23					0
B 20190823 - 55	2019-08-23					0
B 20190823 - 56	2019-08-23					0
B 20190823 - 57	2019-08-23					0
B 20190823 - 58	2019-08-23					0
B 20190823 - 59	2019-08-23					0
B 20190823 - 60	2019-08-23		3.06	Threadlike	Orange	0
B 20190930 - 01	2019-09-30					0
B 20190930 - 02	2019-09-30		8.74	Fragment	Red	0
B 20190930 - 03	2019-09-30		5.66	Threadlike	Blue	0
B 20190930 - 04	2019-09-30					0
B 20190930 - 05	2019-09-30		10.03	Fragment	Blue	0
B 20190930 - 06	2019-09-30					0
B 20190930 - 07	2019-09-30					0
B 20190930 - 08	2019-09-30					0
B 20190930 - 09	2019-09-30					0
B 20190930 - 10	2019-09-30					0
B 20190930 - 11	2019-09-30		2.4	Fragment	Blue	0
B 20190930 - 12	2019-09-30					0
B 20190930 - 13	2019-09-30					0
B 20190930 - 14	2019-09-30					0
B 20190930 - 15	2019-09-30					0
B 20190930 - 16	2019-09-30					0
B 20190930 - 17	2019-09-30					0
B 20190930 - 18	2019-09-30					0
B 20190930 - 19	2019-09-30					0
B 20190930 - 20	2019-09-30					0
B 20190930 - 21	2019-09-30					0
B 20190930 - 22	2019-09-30					0
B 20190930 - 23	2019-09-30					0
B 20190930 - 24	2019-09-30					0
B 20190930 - 25	2019-09-30					0
B 20190930 - 26	2019-09-30		1.38	Sheetlike	Green	0
B 20190930 - 27	2019-09-30					0
B 20190930 - 28	2019-09-30					0
B 20190930 - 29	2019-09-30		65.24	Natural wood	Brown	0
B 20190930 - 30	2019-09-30					0
B 20190930 - 31	2019-09-30					0
B 20190930 - 32	2019-09-30					0
B 20190930 - 33	2019-09-30					0
B 20190930 - 34	2019-09-30					0
B 20190930 - 35	2019-09-30					0
B 20191027 - 01	2019-10-27					0
B 20191027 - 02	2019-10-27					0
B 20191027 - 03	2019-10-27					0
B 20191027 - 04	2019-10-27					0
B 20191027 - 05	2019-10-27					0
B 20191027 - 06	2019-10-27					0
B 20191027 - 07	2019-10-27		176.81	Threadlike	Translucid	0
B 20191027 - 07	2019-10-27		26.86	Threadlike	Translucid	0
B 20191027 - 08	2019-10-27					0
B 20191027 - 09	2019-10-27					0
B 20191027 - 10	2019-10-27					0
B 20191027 - 11	2019-10-27					0
B 20191027 - 12	2019-10-27					0
B 20191027 - 13	2019-10-27					0
B 20191027 - 14	2019-10-27					0
B 20191027 - 15	2019-10-27					0
B 20191027 - 16	2019-10-27					0
B 20191027 - 17	2019-10-27					0
B 20191027 - 18	2019-10-27					0
B 20191027 - 19	2019-10-27					0
B 20191027 - 20	2019-10-27					0
B 20191027 - 21	2019-10-27					0
B 20191027 - 22	2019-10-27		30.12	Threadlike	Red	0
B 20191027 - 23	2019-10-27					0
B 20191027 - 24	2019-10-27					0
B 20191027 - 25	2019-10-27					0
B 20191027 - 26	2019-10-27					0
B 20191027 - 27	2019-10-27					0
B 20191027 - 28	2019-10-27					0
B 20191027 - 29	2019-10-27		4.5	Sheetlike	Green	0
B 20191027 - 30	2019-10-27					0
B 20191027 - 31	2019-10-27					0
B 20191027 - 32	2019-10-27					0
B 20191027 - 33	2019-10-27					0
B 20191027 - 34	2019-10-27					0
B 20191027 - 35	2019-10-27					0
B 20191027 - 36	2019-10-27					0
B 20191027 - 37	2019-10-27					0
B 20191027 - 38	2019-10-27					0
B 20191027 - 39	2019-10-27					0
B 20191027 - 40	2019-10-27					0
B 20191027 - 41	2019-10-27					0
B 20191027 - 42	2019-10-27					0
B 20191027 - 43	2019-10-27					0
B 20191027 - 44	2019-10-27					0
B 20191027 - 45	2019-10-27					0
B 20191027 - 46	2019-10-27					0
B 20191027 - 47	2019-10-27					0
B 20191027 - 48	2019-10-27					0
B 20191027 - 49	2019-10-27					0
B 20191027 - 50	2019-10-27					0
B 20191027 - 51	2019-10-27					0
B 20191027 - 52	2019-10-27					0
B 20191027 - 53	2019-10-27					0
B 20191027 - 54	2019-10-27					0
B 20191027 - 55	2019-10-27					0
B 20191027 - 56	2019-10-27					0
B 20191027 - 57	2019-10-27					0
B 20191027 - 58	2019-10-27					0
B 20191027 - 59	2019-10-27					0
B 20191027 - 60	2019-10-27					0
B 20191027 - 61	2019-10-27					0
B 20191027 - 62	2019-10-27					0
B 20191027 - 63	2019-10-27					0
B 20191027 - 64	2019-10-27					0
B 20191027 - 65	2019-10-27					0
B 20191027 - 66	2019-10-27					0
B 20191027 - 67	2019-10-27					0
B 20191027 - 68	2019-10-27					0
B 20191027 - 69	2019-10-27					0
B 20191027 - 70	2019-10-27					0
B 20191027 - 71	2019-10-27					0
B 20191027 - 72	2019-10-27					0
B 20191027 - 73	2019-10-27					0
B 20191027 - 74	2019-10-27					0
B 20191027 - 75	2019-10-27					0
B 20191027 - 76	2019-10-27					0
B 20191027 - 77	2019-10-27					0
B 20191027 - 78	2019-10-27					0
B 20191027 - 79	2019-10-27					0
B 20191027 - 80	2019-10-27					0
B 20191027 - 81	2019-10-27		86.91	Threadlike	Translucid	0
B 20191027 - 82	2019-10-27					0
B 20191027 - 83	2019-10-27					0
B 20191027 - 84	2019-10-27					0
B 20191027 - 85	2019-10-27					0
B 20191027 - 86	2019-10-27					0
B 20191027 - 87	2019-10-27					0
B 20191027 - 88	2019-10-27					0
B 20191027 - 89	2019-10-27					0
B 20191027 - 90	2019-10-27					0
B 20191121 - 01	2019-11-21					0
B 20191121 - 02	2019-11-21					0
B 20191121 - 03	2019-11-21		27.42	Fibers	White	0
B 20191121 - 04	2019-11-21					0
B 20191121 - 05	2019-11-21					0
B 20191121 - 06	2019-11-21					0
B 20191121 - 07	2019-11-21					0
B 20191121 - 08	2019-11-21					0
B 20191121 - 09	2019-11-21					0
B 20191121 - 10	2019-11-21					0
B 20191121 - 11	2019-11-21					0
B 20191121 - 12	2019-11-21		7.7	Sheetlike	Green	0
B 20191121 - 12	2019-11-21		5.6	Sheetlike	Green	0
B 20191121 - 13	2019-11-21					0
B 20191121 - 14	2019-11-21					0
B 20191121 - 15	2019-11-21					0
B 20191121 - 16	2019-11-21					0
B 20191121 - 17	2019-11-21					0
B 20191121 - 18	2019-11-21					0
B 20191121 - 19	2019-11-21					0
B 20191121 - 20	2019-11-21					0
B 20191121 - 21	2019-11-21					0
B 20191121 - 22	2019-11-21		21.41	Threadlike	Violet	0
B 20191121 - 23	2019-11-21					0
B 20191121 - 24	2019-11-21					0
B 20191121 - 25	2019-11-21					0
B 20191121 - 26	2019-11-21					0
B 20191121 - 27	2019-11-21					0
B 20191121 - 28	2019-11-21		18.39	Sheetlike	Translucid	0
B 20191121 - 29	2019-11-21					0
B 20191121 - 30	2019-11-21					0
B 20191121 - 31	2019-11-21					0
B 20191121 - 32	2019-11-21					0
B 20191121 - 33	2019-11-21					0
B 20191121 - 34	2019-11-21					0
B 20191121 - 35	2019-11-21					0
B 20191121 - 36	2019-11-21					0
B 20191121 - 37	2019-11-21					0
B 20191121 - 38	2019-11-21					0
B 20191121 - 39	2019-11-21					0
B 20191121 - 40	2019-11-21					0
B 20191121 - 41	2019-11-21					0
B 20191121 - 42	2019-11-21					0
B 20191121 - 43	2019-11-21					0
B 20191121 - 44	2019-11-21					0
B 20191121 - 45	2019-11-21					0
B 20191121 - 46	2019-11-21					0
B 20191121 - 47	2019-11-21					0
B 20191121 - 48	2019-11-21					0
B 20191121 - 49	2019-11-21					0
B 20191121 - 50	2019-11-21		6.84	Natural wood	Brown	0
B 20191121 - 51	2019-11-21		3.97	Fragment	White	0
B 20191222 - 01	2019-12-22					0
B 20191222 - 02	2019-12-22					0
B 20191222 - 03	2019-12-22					0
B 20191222 - 04	2019-12-22					0
B 20191222 - 05	2019-12-22					0
B 20191222 - 06	2019-12-22					0
B 20191222 - 07	2019-12-22					0
B 20191222 - 08	2019-12-22		9.71	Sheetlike	Translucid	0
B 20191222 - 09	2019-12-22		8.71	Threadlike	Violet	0
B 20191222 - 10	2019-12-22		5.19	Threadlike	Violet	0
B 20191222 - 11	2019-12-22					0
B 20191222 - 12	2019-12-22					0
B 20191222 - 13	2019-12-22					0
B 20191222 - 14	2019-12-22					0
B 20191222 - 15	2019-12-22		4.37	Threadlike	Purple	0
B 20191222 - 16	2019-12-22					0
B 20191222 - 17	2019-12-22					0
B 20191222 - 18	2019-12-22					0
B 20191222 - 19	2019-12-22					0
B 20191222 - 20	2019-12-22		13.35	Sheetlike	Translucid	0
B 20191222 - 21	2019-12-22		3.71	Threadlike	Violet	0
B 20191222 - 21	2019-12-22		3.88	Threadlike	Violet	0
B 20191222 - 21	2019-12-22		4.74	Threadlike	Violet	0
B 20191222 - 22	2019-12-22					0
B 20191222 - 23	2019-12-22					0
B 20191222 - 24	2019-12-22					0
B 20191222 - 25	2019-12-22					0
B 20191222 - 26	2019-12-22					0
B 20191222 - 27	2019-12-22		4.92	Fragment	Blue	0
B 20191222 - 28	2019-12-22					0
B 20191222 - 29	2019-12-22					0
B 20191222 - 30	2019-12-22					0
B 20191222 - 31	2019-12-22					0
B 20191222 - 32	2019-12-22					0
B 20191222 - 33	2019-12-22					0
B 20191222 - 34	2019-12-22					0
B 20191222 - 35	2019-12-22					0
B 20191222 - 36	2019-12-22					0
B 20191222 - 37	2019-12-22					0
B 20191222 - 38	2019-12-22		4.8	Fragment	Blue	0
B 20191222 - 39	2019-12-22					0
B 20191222 - 40	2019-12-22		13.97	Threadlike	Violet	0
B 20191222 - 41	2019-12-22					0
B 20191222 - 42	2019-12-22					0
B 20191222 - 43	2019-12-22					0
B 20191222 - 44	2019-12-22					0
B 20191222 - 45	2019-12-22		6.32	Fragment	Yellow translucid	0
B 20191222 - 46	2019-12-22		3.74	Fragment	Red	0
B 20191222 - 47	2019-12-22		14.22	Fragment	Black	0
B 20191222 - 48	2019-12-22		9.33	Sheetlike	Green	0
B 20191222 - 49	2019-12-22					0
B 20191222 - 50	2019-12-22					0
B 20191222 - 51	2019-12-22					0
B 20191222 - 52	2019-12-22					0
B 20191222 - 53	2019-12-22					0
B 20191222 - 54	2019-12-22					0
B 20191222 - 55	2019-12-22		27.2	Fragment	Black	0
B 20191222 - 56	2019-12-22					0
B 20191222 - 57	2019-12-22					0
B 20191222 - 58	2019-12-22		30.29	Sheetlike	Translucid	0
B 20191222 - 59	2019-12-22		5.94	Fragment	Yellow translucid	0
B 20191222 - 60	2019-12-22					0
B 20191222 - 61	2019-12-22					0
B 20191222 - 62	2019-12-22					0
B 20191222 - 63	2019-12-22					0
B 20191222 - 64	2019-12-22					0
B 20191222 - 65	2019-12-22					0
B 20191222 - 66	2019-12-22					0
B 20191222 - 67	2019-12-22					0
B 20191222 - 68	2019-12-22					0
B 20191222 - 69	2019-12-22					0
B 20191222 - 70	2019-12-22					0
B 20191222 - 71	2019-12-22					0
B 20191222 - 72	2019-12-22					0
B 20191222 - 73	2019-12-22					0
B 20191222 - 74	2019-12-22					0
B 20191222 - 75	2019-12-22					0
B 20191222 - 76	2019-12-22					0
B 20191222 - 77	2019-12-22					0
B 20191222 - 78	2019-12-22		33.12	Fibers	White	0
B 20191222 - 79	2019-12-22					0
B 20191222 - 80	2019-12-22					0
B 20191222 - 81	2019-12-22					0
B 20191222 - 82	2019-12-22					0
B 20191222 - 83	2019-12-22					0
B 20191222 - 84	2019-12-22					0
B 20191222 - 85	2019-12-22					0
B 20191222 - 86	2019-12-22					0
B 20191222 - 87	2019-12-22					0
B 20191222 - 88	2019-12-22					0
B 20191222 - 89	2019-12-22					0
B 20191222 - 90	2019-12-22					0
B 20200708 - 01	2020-07-08					1
B 20200708 - 02	2020-07-08					1
B 20200708 - 03	2020-07-08					1
B 20200708 - 04	2020-07-08					1
B 20200708 - 05	2020-07-08					1
B 20200708 - 06	2020-07-08					1
B 20200708 - 07	2020-07-08					1
B 20200708 - 08	2020-07-08					1
B 20200708 - 09	2020-07-08					1
B 20200708 - 10	2020-07-08					1
B 20200708 - 11	2020-07-08					1
B 20200722 - 01	2020-07-22					1
B 20200722 - 02	2020-07-22					1
B 20200722 - 03	2020-07-22					1
B 20200722 - 04	2020-07-22					1
B 20200722 - 05	2020-07-22					1
B 20200722 - 06	2020-07-22					1
B 20200722 - 07	2020-07-22					1
B 20200722 - 08	2020-07-22					1
B 20200722 - 09	2020-07-22					1
B 20200722 - 10	2020-07-22					1
B 20200722 - 11	2020-07-22					1
B 20200722 - 12	2020-07-22					1
B 20200722 - 13	2020-07-22					1
B 20200722 - 14	2020-07-22					1
B 20200818 - 01	2020-08-18					1
B 20200818 - 02	2020-08-18					1
B 20200818 - 03	2020-08-18					1
B 20200818 - 04	2020-08-18					1
B 20200818 - 05	2020-08-18					1
B 20200818 - 06	2020-08-18					1
B 20200818 - 07	2020-08-18					1
B 20200818 - 08	2020-08-18					1
B 20200818 - 09	2020-08-18					1
B 20200818 - 10	2020-08-18					1
B 20200818 - 11	2020-08-18					1
B 20200818 - 12	2020-08-18					1
B 20200818 - 13	2020-08-18					1
B 20200818 - 14	2020-08-18					1
B 20200818 - 15	2020-08-18					1
B 20200818 - 16	2020-08-18					1
B 20200818 - 17	2020-08-18					1
B 20200818 - 18	2020-08-18					1
B 20200922 - 01	2020-09-22					1
B 20200922 - 02	2020-09-22					1
B 20200922 - 03	2020-09-22					1
B 20200922 - 04	2020-09-22					1
B 20200922 - 05	2020-09-22					1
B 20200922 - 06	2020-09-22					1
B 20200922 - 07	2020-09-22					1
B 20200922 - 08	2020-09-22					1
B 20200922 - 09	2020-09-22					1
B 20200922 - 10	2020-09-22					1
B 20200922 - 11	2020-09-22					1
B 20200922 - 12	2020-09-22					1
B 20200922 - 13	2020-09-22					1
B 20200922 - 14	2020-09-22					1
B 20200922 - 15	2020-09-22					1
B 20200922 - 16	2020-09-22					1
B 20200922 - 17	2020-09-22					1
B 20200922 - 18	2020-09-22					1
B 20201025 - 01	2020-10-25					1
B 20201025 - 02	2020-10-25					1
B 20201025 - 03	2020-10-25					1
B 20201025 - 04	2020-10-25					1
B 20201025 - 05	2020-10-25					1
B 20201025 - 06	2020-10-25					1
B 20201025 - 07	2020-10-25		4.31	Threadlike	Red	1
B 20201025 - 08	2020-10-25					1
B 20201025 - 09	2020-10-25					1
B 20201025 - 10	2020-10-25					1
B 20201025 - 11	2020-10-25					1
B 20201025 - 12	2020-10-25					1
B 20201025 - 13	2020-10-25					1
B 20201025 - 14	2020-10-25					1
B 20201025 - 15	2020-10-25					1
B 20201025 - 16	2020-10-25		9.23	Threadlike	Red	1
B 20201025 - 17	2020-10-25					1
B 20201025 - 18	2020-10-25					1
B 20201025 - 19	2020-10-25					1
B 20201025 - 20	2020-10-25					1
B 20201025 - 21	2020-10-25					1
B 20201025 - 22	2020-10-25					1
B 20201025 - 23	2020-10-25					1
B 20201025 - 24	2020-10-25					1
B 20201025 - 25	2020-10-25					1
B 20201025 - 26	2020-10-25					1
B 20201025 - 27	2020-10-25		12.68	Fibers	Blue	1
B 20201025 - 28	2020-10-25					1
B 20201025 - 29	2020-10-25					1
B 20201025 - 30	2020-10-25					1
B 20201025 - 31	2020-10-25					1
B 20201025 - 32	2020-10-25					1
B 20201025 - 33	2020-10-25					1
B 20201025 - 34	2020-10-25					1
B 20201025 - 35	2020-10-25					1
B 20201025 - 36	2020-10-25					1
B 20201025 - 37	2020-10-25					1
B 20201025 - 38	2020-10-25					1
B 20201025 - 39	2020-10-25					1
B 20201025 - 40	2020-10-25					1
B 20201025 - 41	2020-10-25					1
B 20201025 - 42	2020-10-25					1
B 20201025 - 43	2020-10-25					1
B 20201025 - 44	2020-10-25					1
B 20201025 - 45	2020-10-25					1
B 20201025 - 46	2020-10-25					1
B 20201025 - 47	2020-10-25					1
B 20201025 - 48	2020-10-25					1
B 20201025 - 49	2020-10-25					1
B 20201025 - 50	2020-10-25					1
B 20201025 - 51	2020-10-25					1
B 20201025 - 52	2020-10-25					1
B 20201025 - 53	2020-10-25					1
B 20201025 - 54	2020-10-25					1
B 20201025 - 55	2020-10-25					1
B 20201025 - 56	2020-10-25					1
B 20201025 - 57	2020-10-25					1
B 20201025 - 58	2020-10-25					1
B 20201025 - 59	2020-10-25					1
B 20201025 - 60	2020-10-25					1
B 20201025 - 61	2020-10-25		3.56	Fibers	Red	1
B 20201025 - 62	2020-10-25					1
B 20201025 - 63	2020-10-25					1
B 20201025 - 64	2020-10-25					1
B 20201025 - 65	2020-10-25					1
B 20201025 - 66	2020-10-25					1
B 20201101 - 01	2020-11-01					1
B 20201101 - 02	2020-11-01					1
B 20201101 - 03	2020-11-01					1
B 20201101 - 04	2020-11-01					1
B 20201101 - 05	2020-11-01					1
B 20201101 - 06	2020-11-01					1
B 20201101 - 07	2020-11-01					1
B 20201101 - 08	2020-11-01					1
B 20201101 - 09	2020-11-01					1
B 20201101 - 10	2020-11-01					1
B 20201101 - 11	2020-11-01					1
B 20201101 - 12	2020-11-01					1
B 20201101 - 13	2020-11-01					1
B 20201101 - 14	2020-11-01					1
B 20201101 - 15	2020-11-01					1
B 20201101 - 16	2020-11-01					1
B 20201101 - 17	2020-11-01					1
B 20201101 - 18	2020-11-01					1
B 20201101 - 19	2020-11-01					1
B 20201101 - 20	2020-11-01					1
B 20201101 - 21	2020-11-01					1
B 20201101 - 22	2020-11-01					1
B 20201101 - 23	2020-11-01					1
B 20201101 - 24	2020-11-01					1
B 20201101 - 25	2020-11-01					1
B 20201101 - 26	2020-11-01					1
B 20201101 - 27	2020-11-01					1
B 20201101 - 28	2020-11-01					1
B 20201101 - 29	2020-11-01					1
B 20201101 - 30	2020-11-01					1
B 20201101 - 31	2020-11-01					1
B 20201101 - 32	2020-11-01					1
B 20201101 - 33	2020-11-01					1
B 20201101 - 34	2020-11-01					1
B 20201101 - 35	2020-11-01					1
B 20201101 - 36	2020-11-01					1
B 20201101 - 37	2020-11-01					1
B 20201101 - 38	2020-11-01					1
B 20201101 - 39	2020-11-01					1
B 20201101 - 40	2020-11-01					1
B 20201101 - 41	2020-11-01					1
B 20201101 - 42	2020-11-01					1
B 20201101 - 43	2020-11-01					1
B 20201101 - 44	2020-11-01					1
B 20201101 - 45	2020-11-01					1
B 20201101 - 46	2020-11-01					1
B 20201101 - 47	2020-11-01					1
B 20201101 - 48	2020-11-01					1
B 20201101 - 49	2020-11-01					1
B 20201101 - 50	2020-11-01					1
B 20201101 - 51	2020-11-01					1
B 20201101 - 52	2020-11-01					1
B 20201101 - 53	2020-11-01					1
B 20201101 - 54	2020-11-01					1
B 20201101 - 55	2020-11-01					1
B 20201101 - 56	2020-11-01					1
B 20201101 - 57	2020-11-01					1
B 20201101 - 58	2020-11-01					1
B 20201101 - 59	2020-11-01					1
B 20201101 - 60	2020-11-01		9.14	Threadlike	Blue	1
B 20201101 - 61	2020-11-01					1
B 20201101 - 62	2020-11-01		39.88	Fibers	Red	1
B 20201101 - 62	2020-11-01		13.35	Fibers	Red	1
B 20201101 - 63	2020-11-01					1
B 20201101 - 64	2020-11-01					1
B 20201101 - 65	2020-11-01					1
B 20201101 - 66	2020-11-01					1
B 20201101 - 67	2020-11-01					1
B 20201101 - 68	2020-11-01		2.68	Paint flakes	Red	1
B 20201101 - 69	2020-11-01					1
B 20201101 - 70	2020-11-01					1
B 20201101 - 71	2020-11-01					1
B 20201101 - 72	2020-11-01					1
B 20201101 - 73	2020-11-01					1
B 20201101 - 74	2020-11-01					1
B 20201101 - 75	2020-11-01					1
B 20201101 - 76	2020-11-01					1
B 20201101 - 77	2020-11-01					1
B 20201108 - 01	2020-11-08					1
B 20201108 - 02	2020-11-08					1
B 20201108 - 03	2020-11-08					1
B 20201108 - 04	2020-11-08					1
B 20201108 - 05	2020-11-08					1
B 20201108 - 06	2020-11-08					1
B 20201108 - 07	2020-11-08					1
B 20201108 - 08	2020-11-08					1
B 20201108 - 09	2020-11-08					1
B 20201108 - 10	2020-11-08					1
B 20201108 - 11	2020-11-08					1
B 20201108 - 12	2020-11-08					1
B 20201108 - 13	2020-11-08					1
B 20201108 - 14	2020-11-08					1
B 20201108 - 15	2020-11-08					1
B 20201108 - 16	2020-11-08					1
B 20201108 - 17	2020-11-08					1
B 20201108 - 18	2020-11-08					1
B 20201108 - 19	2020-11-08					1
B 20201108 - 20	2020-11-08					1
B 20201108 - 21	2020-11-08					1
B 20201108 - 22	2020-11-08					1
B 20201108 - 23	2020-11-08					1
B 20201108 - 24	2020-11-08					1
B 20201108 - 25	2020-11-08					1
B 20201108 - 26	2020-11-08					1
B 20201108 - 27	2020-11-08					1
B 20201108 - 28	2020-11-08					1
B 20201108 - 29	2020-11-08					1
B 20201108 - 30	2020-11-08					1
B 20201108 - 31	2020-11-08					1
B 20201108 - 32	2020-11-08					1
B 20201108 - 33	2020-11-08					1
B 20201108 - 34	2020-11-08					1
B 20201108 - 35	2020-11-08					1
B 20201108 - 36	2020-11-08					1
B 20201108 - 37	2020-11-08					1
B 20201108 - 38	2020-11-08					1
B 20201108 - 39	2020-11-08					1
B 20201108 - 40	2020-11-08					1
B 20201108 - 41	2020-11-08					1
B 20201108 - 42	2020-11-08					1
B 20201108 - 43	2020-11-08					1
B 20201108 - 44	2020-11-08					1
B 20201108 - 45	2020-11-08					1
B 20201108 - 46	2020-11-08					1
B 20201108 - 47	2020-11-08					1
B 20201108 - 48	2020-11-08					1
B 20201115 - 01	2020-11-15					1
B 20201115 - 02	2020-11-15					1
B 20201115 - 03	2020-11-15					1
B 20201115 - 04	2020-11-15					1
B 20201115 - 05	2020-11-15					1
B 20201115 - 06	2020-11-15					1
B 20201115 - 07	2020-11-15					1
B 20201115 - 08	2020-11-15					1
B 20201115 - 09	2020-11-15					1
B 20201115 - 10	2020-11-15					1
B 20201115 - 11	2020-11-15					1
B 20201115 - 12	2020-11-15					1
B 20201115 - 13	2020-11-15					1
B 20201115 - 14	2020-11-15					1
B 20201115 - 15	2020-11-15					1
B 20201115 - 16	2020-11-15					1
B 20201115 - 17	2020-11-15					1
B 20201115 - 18	2020-11-15		47.06	Threadlike	Red/Green/Black	1
B 20201115 - 18	2020-11-15		44.3	Threadlike	Red/Green/Black	1
B 20201115 - 18	2020-11-15		56.07	Threadlike	Red/Green/Black	1
B 20201115 - 19	2020-11-15					1
B 20201115 - 20	2020-11-15					1
B 20201115 - 21	2020-11-15					1
B 20201115 - 22	2020-11-15					1
B 20201115 - 23	2020-11-15					1
B 20201115 - 24	2020-11-15					1
B 20201115 - 25	2020-11-15					1
B 20201115 - 26	2020-11-15					1
B 20201115 - 27	2020-11-15					1
B 20201115 - 28	2020-11-15					1
B 20201115 - 29	2020-11-15					1
B 20201115 - 30	2020-11-15					1
B 20201115 - 31	2020-11-15					1
B 20201115 - 32	2020-11-15					1
B 20201115 - 33	2020-11-15					1
B 20201115 - 34	2020-11-15					1
B 20201115 - 35	2020-11-15					1
B 20201115 - 36	2020-11-15					1
B 20201115 - 37	2020-11-15					1
B 20201115 - 38	2020-11-15					1
B 20201115 - 39	2020-11-15					1
B 20201115 - 40	2020-11-15					1
B 20201115 - 41	2020-11-15					1
B 20201115 - 42	2020-11-15					1
B 20201115 - 43	2020-11-15					1
B 20201115 - 44	2020-11-15					1
B 20201115 - 45	2020-11-15					1
B 20201115 - 46	2020-11-15					1
B 20201115 - 47	2020-11-15					1
B 20201122 - 01	2020-11-22					1
B 20201122 - 02	2020-11-22					1
B 20201122 - 03	2020-11-22					1
B 20201122 - 04	2020-11-22					1
B 20201122 - 05	2020-11-22					1
B 20201122 - 06	2020-11-22					1
B 20201122 - 07	2020-11-22					1
B 20201122 - 08	2020-11-22					1
B 20201122 - 09	2020-11-22					1
B 20201122 - 10	2020-11-22					1
B 20201122 - 11	2020-11-22					1
B 20201122 - 12	2020-11-22					1
B 20201122 - 13	2020-11-22					1
B 20201122 - 14	2020-11-22					1
B 20201122 - 15	2020-11-22					1
B 20201122 - 16	2020-11-22					1
B 20201122 - 17	2020-11-22					1
B 20201122 - 18	2020-11-22					1
B 20201122 - 19	2020-11-22		5.55	Sheetlike	Yellow	1
B 20201122 - 20	2020-11-22					1
B 20201122 - 21	2020-11-22					1
B 20201122 - 22	2020-11-22					1
B 20201122 - 23	2020-11-22					1
B 20201122 - 24	2020-11-22					1
B 20201122 - 25	2020-11-22					1
B 20201122 - 26	2020-11-22					1
B 20201122 - 27	2020-11-22					1
B 20201122 - 28	2020-11-22					1
B 20201122 - 29	2020-11-22					1
B 20201122 - 30	2020-11-22					1
B 20201122 - 31	2020-11-22					1
B 20201122 - 32	2020-11-22					1
B 20201122 - 33	2020-11-22					1
B 20201122 - 34	2020-11-22					1
B 20201122 - 35	2020-11-22					1
B 20201122 - 36	2020-11-22					1
B 20201122 - 37	2020-11-22					1
B 20201122 - 38	2020-11-22					1
B 20201122 - 39	2020-11-22					1
B 20201122 - 40	2020-11-22					1
B 20201122 - 41	2020-11-22					1
B 20201122 - 42	2020-11-22					1
B 20201129 - 01	2020-11-29					1
B 20201129 - 02	2020-11-29					1
B 20201129 - 03	2020-11-29					1
B 20201129 - 04	2020-11-29					1
B 20201129 - 05	2020-11-29					1
B 20201129 - 06	2020-11-29					1
B 20201129 - 07	2020-11-29					1
B 20201129 - 08	2020-11-29					1
B 20201129 - 09	2020-11-29					1
B 20201129 - 10	2020-11-29					1
B 20201129 - 11	2020-11-29		38.81	Threadlike	Red	1
B 20201129 - 12	2020-11-29					1
B 20201129 - 13	2020-11-29					1
B 20201129 - 14	2020-11-29		6.99	Fragment	Blue	1
B 20201129 - 15	2020-11-29					1
B 20201129 - 16	2020-11-29					1
B 20201129 - 17	2020-11-29					1
B 20201129 - 18	2020-11-29					1
B 20201129 - 19	2020-11-29					1
B 20201129 - 20	2020-11-29					1
B 20201129 - 21	2020-11-29					1
B 20201129 - 22	2020-11-29					1
B 20201129 - 23	2020-11-29					1
B 20201129 - 24	2020-11-29					1
B 20201129 - 25	2020-11-29					1
B 20201129 - 26	2020-11-29					1
B 20201129 - 27	2020-11-29					1
B 20201129 - 28	2020-11-29					1
B 20201129 - 29	2020-11-29					1
B 20201129 - 30	2020-11-29					1
B 20201129 - 31	2020-11-29					1
B 20201129 - 32	2020-11-29					1
B 20201129 - 33	2020-11-29					1
B 20201129 - 34	2020-11-29					1
B 20201129 - 35	2020-11-29					1
B 20201129 - 36	2020-11-29					1
B 20201129 - 37	2020-11-29					1
B 20201129 - 38	2020-11-29					1
B 20201129 - 39	2020-11-29					1
B 20201129 - 40	2020-11-29					1
B 20201129 - 41	2020-11-29					1
B 20201129 - 42	2020-11-29					1
B 20201129 - 43	2020-11-29					1
B 20201129 - 44	2020-11-29					1
B 20201129 - 45	2020-11-29					1
B 20201129 - 46	2020-11-29					1
B 20201129 - 47	2020-11-29					1
B 20201129 - 48	2020-11-29					1
B 20201129 - 49	2020-11-29					1
B 20201206 - 01	2020-12-06					1
B 20201206 - 02	2020-12-06					1
B 20201206 - 03	2020-12-06					1
B 20201206 - 04	2020-12-06					1
B 20201206 - 05	2020-12-06		27.16	Threadlike	Green	1
B 20201206 - 06	2020-12-06					1
B 20201206 - 07	2020-12-06					1
B 20201206 - 08	2020-12-06					1
B 20201206 - 09	2020-12-06					1
B 20201206 - 10	2020-12-06					1
B 20201206 - 11	2020-12-06					1
B 20201206 - 12	2020-12-06					1
B 20201206 - 13	2020-12-06					1
B 20201206 - 14	2020-12-06					1
B 20201206 - 15	2020-12-06					1
B 20201206 - 16	2020-12-06					1
B 20201206 - 17	2020-12-06					1
B 20201206 - 18	2020-12-06					1
B 20201206 - 19	2020-12-06					1
B 20201206 - 20	2020-12-06					1
B 20201206 - 21	2020-12-06		14.56	Fragment	Blue/Red	1
B 20201206 - 21	2020-12-06		12.78	Fragment	Blue/Red	1
B 20201206 - 22	2020-12-06					1
B 20201206 - 23	2020-12-06					1
B 20201206 - 24	2020-12-06					1
B 20201206 - 25	2020-12-06		8.55	Fragment	Green	1
B 20201206 - 26	2020-12-06					1
B 20201206 - 27	2020-12-06					1
B 20201206 - 28	2020-12-06					1
B 20201206 - 29	2020-12-06					1
B 20201206 - 30	2020-12-06					1
B 20201206 - 31	2020-12-06					1
B 20201206 - 32	2020-12-06					1
B 20201206 - 33	2020-12-06					1
B 20201206 - 34	2020-12-06					1
B 20201206 - 35	2020-12-06					1
B 20201206 - 36	2020-12-06					1
B 20201206 - 37	2020-12-06					1
B 20201206 - 38	2020-12-06					1
B 20201206 - 39	2020-12-06					1
B 20201206 - 40	2020-12-06					1
B 20201206 - 41	2020-12-06					1
B 20201206 - 42	2020-12-06					1
B 20201206 - 43	2020-12-06					1
B 20201213 - 01	2020-12-13					1
B 20201213 - 02	2020-12-13					1
B 20201213 - 03	2020-12-13					1
B 20201213 - 04	2020-12-13					1
B 20201213 - 05	2020-12-13					1
B 20201213 - 06	2020-12-13		28.33	Fibers	Green	1
B 20201213 - 07	2020-12-13					1
B 20201213 - 08	2020-12-13					1
B 20201213 - 09	2020-12-13					1
B 20201213 - 10	2020-12-13					1
B 20201213 - 11	2020-12-13					1
B 20201213 - 12	2020-12-13					1
B 20201213 - 13	2020-12-13					1
B 20201213 - 14	2020-12-13					1
B 20201213 - 15	2020-12-13					1
B 20201213 - 16	2020-12-13					1
B 20201213 - 17	2020-12-13					1
B 20201213 - 18	2020-12-13					1
B 20201213 - 19	2020-12-13					1
B 20201213 - 20	2020-12-13					1
B 20201213 - 21	2020-12-13					1
B 20201213 - 22	2020-12-13					1
B 20201213 - 23	2020-12-13					1
B 20201213 - 24	2020-12-13					1
B 20201213 - 25	2020-12-13					1
B 20201213 - 26	2020-12-13					1
B 20201213 - 27	2020-12-13					1
B 20201213 - 28	2020-12-13					1
B 20201213 - 29	2020-12-13					1
B 20201213 - 30	2020-12-13					1
B 20201213 - 31	2020-12-13					1
B 20201220 - 01	2020-12-20					1
B 20201220 - 02	2020-12-20					1
B 20201220 - 03	2020-12-20					1
B 20201220 - 04	2020-12-20					1
B 20201220 - 05	2020-12-20					1
B 20201220 - 06	2020-12-20					1
B 20201220 - 07	2020-12-20					1
B 20201220 - 08	2020-12-20					1
B 20201220 - 09	2020-12-20					1
B 20201220 - 10	2020-12-20					1
B 20201220 - 11	2020-12-20					1
B 20201220 - 12	2020-12-20					1
B 20201220 - 13	2020-12-20					1
B 20201220 - 14	2020-12-20					1
B 20201220 - 15	2020-12-20					1
B 20201220 - 16	2020-12-20					1
B 20201220 - 17	2020-12-20					1
B 20201220 - 18	2020-12-20					1
B 20201220 - 19	2020-12-20					1
B 20201220 - 20	2020-12-20					1
B 20201220 - 21	2020-12-20					1
B 20201220 - 22	2020-12-20					1
B 20201220 - 23	2020-12-20					1
B 20201220 - 24	2020-12-20					1
B 20201220 - 25	2020-12-20					1
B 20201220 - 26	2020-12-20					1
B 20201220 - 27	2020-12-20					1
B 20201220 - 28	2020-12-20					1
B 20201220 - 29	2020-12-20					1
B 20210117 - 01	2021-01-17					1
B 20210117 - 02	2021-01-17					1
B 20210117 - 03	2021-01-17					1
B 20210117 - 04	2021-01-17					1
B 20210117 - 05	2021-01-17					1
B 20210117 - 06	2021-01-17					1
B 20210117 - 07	2021-01-17					1
B 20210117 - 08	2021-01-17					1
B 20210117 - 09	2021-01-17					1
B 20210117 - 10	2021-01-17					1
B 20210117 - 11	2021-01-17					1
B 20210117 - 12	2021-01-17					1
B 20210117 - 13	2021-01-17					1
B 20210117 - 14	2021-01-17					1
B 20210124 - 01	2021-01-24		12.32	Fragment	Pink	1
B 20210124 - 02	2021-01-24					1
B 20210124 - 03	2021-01-24					1
B 20210124 - 04	2021-01-24					1
B 20210124 - 05	2021-01-24		1.61	Paint flakes	Red	1
B 20210124 - 06	2021-01-24					1
B 20210124 - 07	2021-01-24					1
B 20210124 - 08	2021-01-24					1
B 20210124 - 09	2021-01-24					1
B 20210124 - 10	2021-01-24					1
B 20210124 - 11	2021-01-24					1
B 20210124 - 12	2021-01-24					1
B 20210207 - 01	2021-02-07					1
B 20210207 - 02	2021-02-07					1
B 20210207 - 03	2021-02-07		7.73	Threadlike	Green	1
B 20210207 - 04	2021-02-07					1
B 20210207 - 05	2021-02-07					1
B 20210207 - 06	2021-02-07					1
B 20210207 - 07	2021-02-07					1
B 20210207 - 08	2021-02-07					1
B 20210207 - 09	2021-02-07					1
B 20210207 - 10	2021-02-07					1
B 20210207 - 11	2021-02-07					1
B 20210207 - 12	2021-02-07					1
B 20210207 - 13	2021-02-07					1
B 20210207 - 14	2021-02-07					1
B 20210207 - 15	2021-02-07					1
B 20210207 - 16	2021-02-07					1
B 20210207 - 17	2021-02-07					1
B 20210207 - 18	2021-02-07					1
B 20210207 - 19	2021-02-07					1
B 20210207 - 20	2021-02-07					1
B 20210207 - 21	2021-02-07					1
B 20210207 - 22	2021-02-07					1
B 20210207 - 23	2021-02-07					1
B 20210207 - 24	2021-02-07					1
B 20210207 - 25	2021-02-07					1
B 20210207 - 26	2021-02-07					1
B 20210207 - 27	2021-02-07					1
B 20210207 - 28	2021-02-07					1
B 20210207 - 29	2021-02-07					1
B 20210207 - 30	2021-02-07					1
B 20210207 - 31	2021-02-07					1
B 20210207 - 32	2021-02-07					1
B 20210207 - 33	2021-02-07					1
B 20210207 - 34	2021-02-07					1
B 20210207 - 35	2021-02-07					1
B 20210214 - 01	2021-02-14					1
B 20210214 - 02	2021-02-14					1
B 20210214 - 03	2021-02-14					1
B 20210214 - 04	2021-02-14					1
B 20210214 - 05	2021-02-14					1
B 20210214 - 06	2021-02-14					1
B 20210214 - 07	2021-02-14					1
B 20210214 - 08	2021-02-14					1
B 20210214 - 09	2021-02-14					1
B 20210214 - 10	2021-02-14					1
B 20210214 - 11	2021-02-14					1
B 20210214 - 12	2021-02-14		6.38	Fibers	Blue	1
B 20210214 - 13	2021-02-14					1
B 20210214 - 14	2021-02-14					1
B 20210214 - 15	2021-02-14					1
B 20210214 - 16	2021-02-14					1
B 20210214 - 17	2021-02-14					1
B 20210214 - 18	2021-02-14					1
B 20210214 - 19	2021-02-14					1
B 20210214 - 20	2021-02-14					1
B 20210214 - 21	2021-02-14					1
B 20210214 - 22	2021-02-14					1
B 20210214 - 23	2021-02-14					1
B 20210214 - 24	2021-02-14					1
B 20210214 - 25	2021-02-14					1
B 20210214 - 26	2021-02-14					1
B 20210214 - 27	2021-02-14					1
B 20210214 - 28	2021-02-14					1
B 20210214 - 29	2021-02-14					1
B 20210214 - 30	2021-02-14					1
B 20210214 - 31	2021-02-14					1
B 20210214 - 32	2021-02-14					1
B 20210214 - 33	2021-02-14					1
B 20210214 - 34	2021-02-14					1
B 20210214 - 35	2021-02-14					1
B 20210214 - 36	2021-02-14					1
B 20210214 - 37	2021-02-14					1
B 20210214 - 38	2021-02-14					1
B 20210221 - 01	2021-02-21					1
B 20210221 - 02	2021-02-21		26.29	Fibers	Pink	1
B 20210221 - 02	2021-02-21		10.58	Fibers	Pink	1
B 20210221 - 02	2021-02-21		21.51	Fibers	Pink	1
B 20210221 - 03	2021-02-21					1
B 20210221 - 04	2021-02-21		21.7	Threadlike	Green	1
B 20210221 - 04	2021-02-21		4.89	Threadlike	Green	1
B 20210221 - 05	2021-02-21					1
B 20210221 - 06	2021-02-21		9.02	Threadlike	Red/White/Blue/Black/Translucid	1
B 20210221 - 06	2021-02-21		19.47	Threadlike	Red/White/Blue/Black/Translucid	1
B 20210221 - 06	2021-02-21		20.29	Threadlike	Red/White/Blue/Black/Translucid	1
B 20210221 - 06	2021-02-21		20.29	Threadlike	Red/White/Blue/Black/Translucid	1
B 20210221 - 06	2021-02-21		19.9	Threadlike	Red/White/Blue/Black/Translucid	1
B 20210221 - 06	2021-02-21		5.31	Threadlike	Red/White/Blue/Black/Translucid	1
B 20210221 - 06	2021-02-21		8.95	Threadlike	Red/White/Blue/Black/Translucid	1
B 20210221 - 06	2021-02-21		30.07	Threadlike	Red/White/Blue/Black/Translucid	1
B 20210221 - 06	2021-02-21		14.57	Threadlike	Red/White/Blue/Black/Translucid	1
B 20210221 - 06	2021-02-21		8.1	Threadlike	Red/White/Blue/Black/Translucid	1
B 20210221 - 06	2021-02-21		3.55	Threadlike	Red/White/Blue/Black/Translucid	1
B 20210221 - 06	2021-02-21		6.12	Threadlike	Red/White/Blue/Black/Translucid	1
B 20210221 - 06	2021-02-21		5.26	Threadlike	Red/White/Blue/Black/Translucid	1
B 20210221 - 06	2021-02-21		6.54	Threadlike	Red/White/Blue/Black/Translucid	1
B 20210221 - 06	2021-02-21		10.67	Threadlike	Red/White/Blue/Black/Translucid	1
B 20210221 - 06	2021-02-21		27.88	Threadlike	Red/White/Blue/Black/Translucid	1
B 20210221 - 06	2021-02-21		27.46	Threadlike	Red/White/Blue/Black/Translucid	1
B 20210221 - 06	2021-02-21		9.58	Threadlike	Red/White/Blue/Black/Translucid	1
B 20210221 - 06	2021-02-21		17.49	Threadlike	Red/White/Blue/Black/Translucid	1
B 20210221 - 06	2021-02-21		9.23	Threadlike	Red/White/Blue/Black/Translucid	1
B 20210221 - 06	2021-02-21		11.55	Threadlike	Red/White/Blue/Black/Translucid	1
B 20210221 - 06	2021-02-21		22.69	Threadlike	Red/White/Blue/Black/Translucid	1
B 20210221 - 06	2021-02-21		15.16	Threadlike	Red/White/Blue/Black/Translucid	1
B 20210221 - 06	2021-02-21		6.42	Threadlike	Red/White/Blue/Black/Translucid	1
B 20210221 - 06	2021-02-21		7.35	Threadlike	Red/White/Blue/Black/Translucid	1
B 20210221 - 06	2021-02-21		6.92	Threadlike	Red/White/Blue/Black/Translucid	1
B 20210221 - 06	2021-02-21		22.37	Threadlike	Red/White/Blue/Black/Translucid	1
B 20210221 - 06	2021-02-21		11.47	Threadlike	Red/White/Blue/Black/Translucid	1
B 20210221 - 06	2021-02-21		10.29	Threadlike	Red/White/Blue/Black/Translucid	1
B 20210221 - 06	2021-02-21		13.13	Threadlike	Red/White/Blue/Black/Translucid	1
B 20210221 - 06	2021-02-21		17.08	Threadlike	Red/White/Blue/Black/Translucid	1
B 20210221 - 06	2021-02-21		9.13	Threadlike	Red/White/Blue/Black/Translucid	1
B 20210221 - 06	2021-02-21		40.34	Threadlike	Red/White/Blue/Black/Translucid	1
B 20210221 - 06	2021-02-21		9.48	Threadlike	Red/White/Blue/Black/Translucid	1
B 20210221 - 06	2021-02-21		4.5	Threadlike	Red/White/Blue/Black/Translucid	1
B 20210221 - 06	2021-02-21		12.53	Threadlike	Red/White/Blue/Black/Translucid	1
B 20210221 - 06	2021-02-21		13.53	Threadlike	Red/White/Blue/Black/Translucid	1
B 20210221 - 06	2021-02-21		23.29	Threadlike	Red/White/Blue/Black/Translucid	1
B 20210221 - 06	2021-02-21		10.57	Threadlike	Red/White/Blue/Black/Translucid	1
B 20210221 - 06	2021-02-21		25.85	Threadlike	Red/White/Blue/Black/Translucid	1
B 20210221 - 06	2021-02-21		25.54	Threadlike	Red/White/Blue/Black/Translucid	1
B 20210221 - 06	2021-02-21		19.72	Threadlike	Red/White/Blue/Black/Translucid	1
B 20210221 - 06	2021-02-21		10.08	Threadlike	Red/White/Blue/Black/Translucid	1
B 20210221 - 06	2021-02-21		31.91	Threadlike	Red/White/Blue/Black/Translucid	1
B 20210221 - 06	2021-02-21		18.45	Threadlike	Red/White/Blue/Black/Translucid	1
B 20210221 - 06	2021-02-21		19.9	Threadlike	Red/White/Blue/Black/Translucid	1
B 20210221 - 06	2021-02-21		35.42	Threadlike	Red/White/Blue/Black/Translucid	1
B 20210221 - 06	2021-02-21		8.8	Threadlike	Red/White/Blue/Black/Translucid	1
B 20210221 - 06	2021-02-21		22.12	Threadlike	Red/White/Blue/Black/Translucid	1
B 20210221 - 06	2021-02-21		15.5	Threadlike	Red/White/Blue/Black/Translucid	1
B 20210221 - 06	2021-02-21		15.85	Threadlike	Red/White/Blue/Black/Translucid	1
B 20210221 - 06	2021-02-21		22.38	Threadlike	Red/White/Blue/Black/Translucid	1
B 20210221 - 06	2021-02-21		12.01	Threadlike	Red/White/Blue/Black/Translucid	1
B 20210221 - 06	2021-02-21		13.98	Threadlike	Red/White/Blue/Black/Translucid	1
B 20210221 - 06	2021-02-21		14.48	Threadlike	Red/White/Blue/Black/Translucid	1
B 20210221 - 06	2021-02-21		3.28	Threadlike	Red/White/Blue/Black/Translucid	1
B 20210221 - 06	2021-02-21		4.99	Threadlike	Red/White/Blue/Black/Translucid	1
B 20210221 - 07	2021-02-21					1
B 20210221 - 08	2021-02-21					1
B 20210221 - 09	2021-02-21					1
B 20210221 - 10	2021-02-21					1
B 20210221 - 11	2021-02-21					1
B 20210221 - 12	2021-02-21					1
B 20210221 - 13	2021-02-21					1
B 20210221 - 14	2021-02-21					1
B 20210221 - 15	2021-02-21					1
B 20210221 - 16	2021-02-21					1
B 20210221 - 17	2021-02-21					1
B 20210221 - 18	2021-02-21					1
B 20210221 - 19	2021-02-21					1
B 20210221 - 20	2021-02-21					1
B 20210221 - 21	2021-02-21					1
B 20210221 - 22	2021-02-21					1
B 20210221 - 23	2021-02-21					1
B 20210221 - 24	2021-02-21					1
B 20210221 - 25	2021-02-21					1
B 20210221 - 26	2021-02-21					1
B 20210221 - 27	2021-02-21					1
B 20210221 - 28	2021-02-21					1
B 20210221 - 29	2021-02-21					1
B 20210221 - 30	2021-02-21		10.8	Balloon	Orange/Pink	1
B 20210221 - 30	2021-02-21		8.62	Balloon	Orange/Pink	1
B 20210228 - 01	2021-02-28					1
B 20210228 - 02	2021-02-28					1
B 20210228 - 03	2021-02-28					1
B 20210228 - 04	2021-02-28					1
B 20210228 - 05	2021-02-28					1
B 20210228 - 06	2021-02-28					1
B 20210228 - 07	2021-02-28					1
B 20210228 - 08	2021-02-28					1
B 20210228 - 09	2021-02-28					1
B 20210228 - 10	2021-02-28					1
B 20210228 - 11	2021-02-28					1
B 20210228 - 12	2021-02-28					1
B 20210228 - 13	2021-02-28					1
B 20210228 - 14	2021-02-28					1
B 20210228 - 15	2021-02-28		4.74	Sheetlike	Blue	1
B 20210228 - 16	2021-02-28					1
B 20210228 - 17	2021-02-28					1
B 20210228 - 18	2021-02-28					1
B 20210228 - 19	2021-02-28					1
B 20210228 - 20	2021-02-28					1
B 20210228 - 21	2021-02-28					1
B 20210228 - 22	2021-02-28					1
B 20210228 - 23	2021-02-28					1
B 20210228 - 24	2021-02-28		20.76	Metal	Silver	1
B 20210228 - 25	2021-02-28					1

## Sheet: Code Book
Code	Unique pellet code
Date	Date of pellet collection
Number of collection	Number for the pellet collection block (e.g. 1 = first pellet collection, 2 = second pellet collection, etc.)
Total number of items	Total number nof item found at each pellet
Otoliths	Number of fish otoliths
Shell remians	Number of invertebrate shell remian items
Snails	Number of marine snail shells
Bibalves	Number of bibalve shells
Parasites	Number of parasite worms
Fish remains	Number of other fish remains (vertebrae, bones)
sea urchin remains	Number of sea urchin remains
Stones	Number of stones
Limpet	Number of limpet shells
Poliplacophorus plates	Number of poliplacophorus plates
Crustacean remian	Number of crsutacean remains
Algae	Number of algae remains
Size (mm)	Maximum length in mm of the item. If more than one item was found in the pellet, the size of each item is separated by slash (/)
General classification	General classification of the items (plastic, glass, processed wood, fibers, metal, paint chip and balloon). If more than one type of item was found in a pellet, the types are separeted by a slash (/)
Plastic classification	Classifitcation of plastic by shape
Color	Item color
Pandemic	If the sample was analized during pandemic = 1 or before pandemic = 0
Non-plastics presence	If the sample had non-plastic = 1
Debris plastic items	Number of plastic items found in every pellet
Debris non-plastic items	Number of non-plastics items found in every pellet
Plastic presence	If the sample had plastic = 1 or not plastic = 0
Debris presence (plastic+non-plastic)	If the sample had debris = 1 or not debris = 0

## Sheet: processed data (TC)
Fecha	total bolos	count bolos con plastico	count bolos sin plastico	N de contingencia	% ocurrencia	Fase	N de contingencia	sum total bolos	sum count bolos con plastico				expected	Bolos sin plástico
2018-10-15	138	6	132	0	4.35	pre - pandemia	0	800	58				0	58
2018-11-21	138	11	127	0	7.97	pandemia restricciones	1	61	0				0	0
2018-12-19	95	4	91	0	4.21	pandemia - restricciones P	2	432	10				0	10
2019-01-22	15	1	14	0	6.67	pandemia restricciones	4	154	6				0	6
2019-02-19	11	0	11	0	0				74		0		0	74
2019-07-22	77	4	73	0	5.19
2019-08-23	60	3	57	0	5		647
2019-09-30	35	5	30	0	14.29		1447
2019-10-27	90	4	86	0	4.44
2019-11-21	51	4	47	0	7.84
2019-12-22	90	16	74	0	17.78
2020-07-08	11	0	11	1	0
2020-07-22	14	0	14	1	0
2020-08-18	18	0	18	1	0
2020-09-22	18	0	18	1	0		Con plástico		Sin plástico				Con plástico	Sin plástico
2020-10-25	66	2	64	2	3.03	Pre - pandemia	87				Fases		valor de lo observado
2020-11-01	77	1	76	2	1.3		100.74						valor de lo esperado
2020-11-08	48	0	48	2	0	Pandemia con restricciones	1
2020-11-15	47	1	46	2	2.13		7.54
2020-11-22	42	1	41	2	2.38	Pandemia con restricciones parciales	60
2020-11-29	49	2	47	2	4.08		53.83
2020-12-06	43	3	40	2	6.98	Pandemia con restricciones	40
2020-12-13	31	0	31	2	0		25.86
2020-12-20	29	0	29	2	0
2021-01-17	14	0	14	4	0
2021-01-24	12	2	10	4	16.67
2021-02-07	35	1	34	4	2.86		Con plástico		Sin plástico
2021-02-14	38	0	38	4	0	Pre - pandemia	87		727
2021-02-21	30	2	28	4	6.67	Pandemia con restricciones	1		60
2021-02-28	25	1	24	4	4	Pandemia con restricciones parciales	60		375
		74				Pandemia con restricciones	40		169
	USER PLASTIC	RUBBISH	ALL MATERIALS
	n FO %	n %	n. %	preguntar como se sacaron los valores de arriba
Pre - pandemic	58. 7.25
Total pandemic 1	0
Partial pandemic
Total pandemic 2
Pre - pandemic
Fecha	total bolos	count bolos con plastico	count bolos sin plastico	N de contingencia	% ocurrencia
2018-10-15	138	6	132	0	4.35
2018-11-21	138	11	127	0	7.97
2018-12-19	95	4	91	0	4.21
2019-01-22	15	1	14	0	6.67
2019-02-19	11	0	11	0	0
2019-07-22	77	4	73	0	5.19
2019-08-23	60	3	57	0	5
2019-09-30	35	5	30	0	14.29
2019-10-27	90	4	86	0	4.44
2019-11-21	51	4	47	0	7.84
2019-12-22	90	16	74	0	17.78
Suma	800	58			7.25
User plastic	pre - pandemia
0
Fecha	total bolos	count bolos con plastico	FO %
2018-10-15	138	6
2018-11-21	138	11
2018-12-19	95	4
2019-01-22	15	1
2019-02-19	11	0
2019-07-22	77	4					Phases	USER PLASTIC		RUBBISH		ALL MATERIALS
2019-08-23	60	3						n	% FO	n	% FO	n	% FO
2019-09-30	35	5					Pre - pandemic	58	7.25	12	1.5	70	8.75
2019-10-27	90	4					Total pandemic 1	0	0	0	0	0	0
2019-11-21	51	4					Partial pandemic	10	2.31	3	0.69	13	0.898411
2019-12-22	90	16					Total pandemic 2	6	3.9	6	3.9	12	#DIV/0!
% FO	800	58	7.25
1
#REF!
	0
2
Fecha	total bolos	count bolos con plastico
				1 + 3	0
					1
					#REF!
% FO	0	0	#DIV/0!		Fecha	total bolos	count bolos con plastico
3
Fecha	total bolos	count bolos con plastico
					% FO	0	0	#DIV/0!
% FO	0	0	#DIV/0!
					All materials en total pandemic 1 (user plastic + ribbish)= (6+6)/(61+154)
Rubbish
pandemia	total bolos	%FO
0	12	1.5
1	9	0.621977
		#DIV/0!
Bolos totales por fase
pandemia	total bolos
0	800
1	647	1 y 3 se juntan	1 + 3 = total pandemic	647
	1447
pandemia	total bolos
0	58
1	16

## Sheet: Tabla R
Código	plastic	pandemia	pandemia_label
B 20181015 - 01	0	0	pre pandemia
B 20181015 - 02	0	0	pre pandemia
B 20181015 - 03	0	0	pre pandemia
B 20181015 - 04	0	0	pre pandemia
B 20181015 - 05	0	0	pre pandemia
B 20181015 - 06	0	0	pre pandemia
B 20181015 - 07	0	0	pre pandemia
B 20181015 - 08	0	0	pre pandemia
B 20181015 - 09	0	0	pre pandemia
B 20181015 - 10	0	0	pre pandemia
B 20181015 - 11	0	0	pre pandemia
B 20181015 - 12	0	0	pre pandemia
B 20181015 - 13	0	0	pre pandemia
B 20181015 - 14	0	0	pre pandemia
B 20181015 - 15	0	0	pre pandemia
B 20181015 - 16	0	0	pre pandemia
B 20181015 - 17	0	0	pre pandemia
B 20181015 - 18	0	0	pre pandemia
B 20181015 - 19	0	0	pre pandemia
B 20181015 - 20	0	0	pre pandemia
B 20181015 - 21	0	0	pre pandemia
B 20181015 - 22	0	0	pre pandemia
B 20181015 - 23	0	0	pre pandemia
B 20181015 - 24	1	0	pre pandemia
B 20181015 - 25	0	0	pre pandemia
B 20181015 - 26	1	0	pre pandemia
B 20181015 - 27	0	0	pre pandemia
B 20181015 - 28	0	0	pre pandemia
B 20181015 - 29	0	0	pre pandemia
B 20181015 - 30	0	0	pre pandemia
B 20181015 - 31	0	0	pre pandemia
B 20181015 - 32	0	0	pre pandemia
B 20181015 - 33	0	0	pre pandemia
B 20181015 - 34	0	0	pre pandemia
B 20181015 - 35	0	0	pre pandemia
B 20181015 - 36	0	0	pre pandemia
B 20181015 - 37	1	0	pre pandemia
B 20181015 - 38	0	0	pre pandemia
B 20181015 - 39	0	0	pre pandemia
B 20181015 - 40	0	0	pre pandemia
B 20181015 - 41	0	0	pre pandemia
B 20181015 - 42	0	0	pre pandemia
B 20181015 - 43	0	0	pre pandemia
B 20181015 - 44	0	0	pre pandemia
B 20181015 - 45	0	0	pre pandemia
B 20181015 - 46	0	0	pre pandemia
B 20181015 - 47	0	0	pre pandemia
B 20181015 - 48	0	0	pre pandemia
B 20181015 - 49	0	0	pre pandemia
B 20181015 - 50	0	0	pre pandemia
B 20181015 - 51	0	0	pre pandemia
B 20181015 - 52	0	0	pre pandemia
B 20181015 - 53	0	0	pre pandemia
B 20181015 - 54	0	0	pre pandemia
B 20181015 - 55	0	0	pre pandemia
B 20181015 - 56	0	0	pre pandemia
B 20181015 - 57	0	0	pre pandemia
B 20181015 - 58	0	0	pre pandemia
B 20181015 - 59	0	0	pre pandemia
B 20181015 - 60	0	0	pre pandemia
B 20181015 - 61	0	0	pre pandemia
B 20181015 - 62	0	0	pre pandemia
B 20181015 - 63	0	0	pre pandemia
B 20181015 - 64	0	0	pre pandemia
B 20181015 - 65	0	0	pre pandemia
B 20181015 - 66	0	0	pre pandemia
B 20181015 - 67	0	0	pre pandemia
B 20181015 - 68	0	0	pre pandemia
B 20181015 - 69	0	0	pre pandemia
B 20181015 - 70	0	0	pre pandemia
B 20181015 - 71	0	0	pre pandemia
B 20181015 - 72	0	0	pre pandemia
B 20181015 - 73	0	0	pre pandemia
B 20181015 - 74	0	0	pre pandemia
B 20181015 - 75	0	0	pre pandemia
B 20181015 - 76	0	0	pre pandemia
B 20181015 - 77	0	0	pre pandemia
B 20181015 - 78	0	0	pre pandemia
B 20181015 - 79	0	0	pre pandemia
B 20181015 - 80	0	0	pre pandemia
B 20181015 - 81	0	0	pre pandemia
B 20181015 - 82	0	0	pre pandemia
B 20181015 - 83	0	0	pre pandemia
B 20181015 - 84	0	0	pre pandemia
B 20181015 - 85	0	0	pre pandemia
B 20181015 - 86	0	0	pre pandemia
B 20181015 - 87	0	0	pre pandemia
B 20181015 - 88	0	0	pre pandemia
B 20181015 - 89	0	0	pre pandemia
B 20181015 - 90	0	0	pre pandemia
B 20181015 - 91	0	0	pre pandemia
B 20181015 - 92	0	0	pre pandemia
B 20181015 - 93	0	0	pre pandemia
B 20181015 - 94	0	0	pre pandemia
B 20181015 - 95	0	0	pre pandemia
B 20181015 - 96	0	0	pre pandemia
B 20181015 - 97	0	0	pre pandemia
B 20181015 - 98	0	0	pre pandemia
B 20181015 - 99	0	0	pre pandemia
B 20181015 - 100	0	0	pre pandemia
B 20181015 - 101	0	0	pre pandemia
B 20181015 - 102	0	0	pre pandemia
B 20181015 - 103	0	0	pre pandemia
B 20181015 - 104	0	0	pre pandemia
B 20181015 - 105	0	0	pre pandemia
B 20181015 - 106	0	0	pre pandemia
B 20181015 - 107	0	0	pre pandemia
B 20181015 - 108	0	0	pre pandemia
B 20181015 - 109	0	0	pre pandemia
B 20181015 - 110	0	0	pre pandemia
B 20181015 - 111	1	0	pre pandemia
B 20181015 - 112	1	0	pre pandemia
B 20181015 - 113	1	0	pre pandemia
B 20181015 - 114	0	0	pre pandemia
B 20181015 - 115	0	0	pre pandemia
B 20181015 - 116	0	0	pre pandemia
B 20181015 - 117	0	0	pre pandemia
B 20181015 - 118	0	0	pre pandemia
B 20181015 - 119	0	0	pre pandemia
B 20181015 - 120	0	0	pre pandemia
B 20181015 - 121	0	0	pre pandemia
B 20181015 - 122	0	0	pre pandemia
B 20181015 - 123	0	0	pre pandemia
B 20181015 - 124	0	0	pre pandemia
B 20181015 - 125	0	0	pre pandemia
B 20181015 - 126	0	0	pre pandemia
B 20181015 - 127	0	0	pre pandemia
B 20181015 - 128	0	0	pre pandemia
B 20181015 - 129	0	0	pre pandemia
B 20181015 - 130	0	0	pre pandemia
B 20181015 - 131	0	0	pre pandemia
B 20181015 - 132	0	0	pre pandemia
B 20181015 - 133	0	0	pre pandemia
B 20181015 - 134	0	0	pre pandemia
B 20181015 - 135	0	0	pre pandemia
B 20181015 - 136	0	0	pre pandemia
B 20181015 - 137	0	0	pre pandemia
B 20181015 - 138	0	0	pre pandemia
B 20181121 - 01	0	0	pre pandemia
B 20181121 - 02	0	0	pre pandemia
B 20181121 - 03	0	0	pre pandemia
B 20181121 - 04	0	0	pre pandemia
B 20181121 - 05	0	0	pre pandemia
B 20181121 - 06	0	0	pre pandemia
B 20181121 - 07	0	0	pre pandemia
B 20181121 - 08	0	0	pre pandemia
B 20181121 - 09	0	0	pre pandemia
B 20181121 - 10	0	0	pre pandemia
B 20181121 - 11	0	0	pre pandemia
B 20181121 - 12	0	0	pre pandemia
B 20181121 - 13	0	0	pre pandemia
B 20181121 - 14	0	0	pre pandemia
B 20181121 - 15	0	0	pre pandemia
B 20181121 - 16	0	0	pre pandemia
B 20181121 - 17	0	0	pre pandemia
B 20181121 - 18	0	0	pre pandemia
B 20181121 - 19	0	0	pre pandemia
B 20181121 - 20	0	0	pre pandemia
B 20181121 - 21	0	0	pre pandemia
B 20181121 - 22	0	0	pre pandemia
B 20181121 - 23	0	0	pre pandemia
B 20181121 - 24	0	0	pre pandemia
B 20181121 - 25	0	0	pre pandemia
B 20181121 - 26	0	0	pre pandemia
B 20181121 - 27	1	0	pre pandemia
B 20181121 - 28	0	0	pre pandemia
B 20181121 - 29	1	0	pre pandemia
B 20181121 - 30	0	0	pre pandemia
B 20181121 - 31	0	0	pre pandemia
B 20181121 - 32	0	0	pre pandemia
B 20181121 - 33	0	0	pre pandemia
B 20181121 - 34	0	0	pre pandemia
B 20181121 - 35	0	0	pre pandemia
B 20181121 - 36	0	0	pre pandemia
B 20181121 - 37	0	0	pre pandemia
B 20181121 - 38	0	0	pre pandemia
B 20181121 - 39	0	0	pre pandemia
B 20181121 - 40	0	0	pre pandemia
B 20181121 - 41	1	0	pre pandemia
B 20181121 - 42	0	0	pre pandemia
B 20181121 - 43	0	0	pre pandemia
B 20181121 - 44	0	0	pre pandemia
B 20181121 - 45	0	0	pre pandemia
B 20181121 - 46	0	0	pre pandemia
B 20181121 - 47	0	0	pre pandemia
B 20181121 - 48	0	0	pre pandemia
B 20181121 - 49	0	0	pre pandemia
B 20181121 - 50	0	0	pre pandemia
B 20181121 - 51	0	0	pre pandemia
B 20181121 - 52	0	0	pre pandemia
B 20181121 - 53	0	0	pre pandemia
B 20181121 - 54	0	0	pre pandemia
B 20181121 - 55	0	0	pre pandemia
B 20181121 - 56	0	0	pre pandemia
B 20181121 - 57	0	0	pre pandemia
B 20181121 - 58	0	0	pre pandemia
B 20181121 - 59	0	0	pre pandemia
B 20181121 - 60	0	0	pre pandemia
B 20181121 - 61	0	0	pre pandemia
B 20181121 - 62	0	0	pre pandemia
B 20181121 - 63	0	0	pre pandemia
B 20181121 - 64	1	0	pre pandemia
B 20181121 - 65	1	0	pre pandemia
B 20181121 - 66	0	0	pre pandemia
B 20181121 - 67	0	0	pre pandemia
B 20181121 - 68	0	0	pre pandemia
B 20181121 - 69	0	0	pre pandemia
B 20181121 - 70	1	0	pre pandemia
B 20181121 - 71	0	0	pre pandemia
B 20181121 - 72	0	0	pre pandemia
B 20181121 - 73	0	0	pre pandemia
B 20181121 - 74	0	0	pre pandemia
B 20181121 - 75	0	0	pre pandemia
B 20181121 - 76	0	0	pre pandemia
B 20181121 - 77	0	0	pre pandemia
B 20181121 - 78	0	0	pre pandemia
B 20181121 - 79	1	0	pre pandemia
B 20181121 - 80	1	0	pre pandemia
B 20181121 - 81	0	0	pre pandemia
B 20181121 - 82	0	0	pre pandemia
B 20181121 - 83	0	0	pre pandemia
B 20181121 - 84	0	0	pre pandemia
B 20181121 - 85	0	0	pre pandemia
B 20181121 - 86	0	0	pre pandemia
B 20181121 - 87	0	0	pre pandemia
B 20181121 - 88	0	0	pre pandemia
B 20181121 - 89	0	0	pre pandemia
B 20181121 - 90	0	0	pre pandemia
B 20181121 - 91	0	0	pre pandemia
B 20181121 - 92	0	0	pre pandemia
B 20181121 - 93	0	0	pre pandemia
B 20181121 - 94	0	0	pre pandemia
B 20181121 - 95	0	0	pre pandemia
B 20181121 - 96	0	0	pre pandemia
B 20181121 - 97	0	0	pre pandemia
B 20181121 - 98	0	0	pre pandemia
B 20181121 - 99	0	0	pre pandemia
B 20181121 - 100	0	0	pre pandemia
B 20181121 - 101	0	0	pre pandemia
B 20181121 - 102	1	0	pre pandemia
B 20181121 - 103	0	0	pre pandemia
B 20181121 - 104	0	0	pre pandemia
B 20181121 - 105	0	0	pre pandemia
B 20181121 - 106	1	0	pre pandemia
B 20181121 - 107	0	0	pre pandemia
B 20181121 - 108	0	0	pre pandemia
B 20181121 - 109	0	0	pre pandemia
B 20181121 - 110	0	0	pre pandemia
B 20181121 - 111	0	0	pre pandemia
B 20181121 - 112	0	0	pre pandemia
B 20181121 - 113	0	0	pre pandemia
B 20181121 - 114	0	0	pre pandemia
B 20181121 - 115	0	0	pre pandemia
B 20181121 - 116	0	0	pre pandemia
B 20181121 - 117	0	0	pre pandemia
B 20181121 - 118	0	0	pre pandemia
B 20181121 - 119	1	0	pre pandemia
B 20181121 - 120	0	0	pre pandemia
B 20181121 - 121	0	0	pre pandemia
B 20181121 - 122	0	0	pre pandemia
B 20181121 - 123	0	0	pre pandemia
B 20181121 - 124	0	0	pre pandemia
B 20181121 - 125	0	0	pre pandemia
B 20181121 - 126	0	0	pre pandemia
B 20181121 - 127	0	0	pre pandemia
B 20181121 - 128	0	0	pre pandemia
B 20181121 - 129	0	0	pre pandemia
B 20181121 - 130	0	0	pre pandemia
B 20181121 - 131	0	0	pre pandemia
B 20181121 - 132	0	0	pre pandemia
B 20181121 - 133	0	0	pre pandemia
B 20181121 - 134	0	0	pre pandemia
B 20181121 - 135	0	0	pre pandemia
B 20181121 - 136	0	0	pre pandemia
B 20181121 - 137	0	0	pre pandemia
B 20181121 - 138	0	0	pre pandemia
B 20181219 - 01	0	0	pre pandemia
B 20181219 - 02	0	0	pre pandemia
B 20181219 - 03	0	0	pre pandemia
B 20181219 - 04	0	0	pre pandemia
B 20181219 - 05	0	0	pre pandemia
B 20181219 - 06	0	0	pre pandemia
B 20181219 - 07	0	0	pre pandemia
B 20181219 - 08	0	0	pre pandemia
B 20181219 - 09	0	0	pre pandemia
B 20181219 - 10	0	0	pre pandemia
B 20181219 - 11	0	0	pre pandemia
B 20181219 - 12	0	0	pre pandemia
B 20181219 - 13	0	0	pre pandemia
B 20181219 - 14	0	0	pre pandemia
B 20181219 - 15	0	0	pre pandemia
B 20181219 - 16	0	0	pre pandemia
B 20181219 - 17	0	0	pre pandemia
B 20181219 - 18	0	0	pre pandemia
B 20181219 - 19	0	0	pre pandemia
B 20181219 - 20	0	0	pre pandemia
B 20181219 - 21	0	0	pre pandemia
B 20181219 - 22	0	0	pre pandemia
B 20181219 - 23	0	0	pre pandemia
B 20181219 - 24	0	0	pre pandemia
B 20181219 - 25	1	0	pre pandemia
B 20181219 - 26	0	0	pre pandemia
B 20181219 - 27	0	0	pre pandemia
B 20181219 - 28	0	0	pre pandemia
B 20181219 - 29	0	0	pre pandemia
B 20181219 - 30	0	0	pre pandemia
B 20181219 - 31	0	0	pre pandemia
B 20181219 - 32	0	0	pre pandemia
B 20181219 - 33	0	0	pre pandemia
B 20181219 - 34	0	0	pre pandemia
B 20181219 - 35	0	0	pre pandemia
B 20181219 - 36	0	0	pre pandemia
B 20181219 - 37	0	0	pre pandemia
B 20181219 - 38	0	0	pre pandemia
B 20181219 - 39	0	0	pre pandemia
B 20181219 - 40	0	0	pre pandemia
B 20181219 - 41	0	0	pre pandemia
B 20181219 - 42	0	0	pre pandemia
B 20181219 - 43	0	0	pre pandemia
B 20181219 - 44	0	0	pre pandemia
B 20181219 - 45	0	0	pre pandemia
B 20181219 - 46	0	0	pre pandemia
B 20181219 - 47	0	0	pre pandemia
B 20181219 - 48	0	0	pre pandemia
B 20181219 - 49	0	0	pre pandemia
B 20181219 - 50	0	0	pre pandemia
B 20181219 - 51	0	0	pre pandemia
B 20181219 - 52	0	0	pre pandemia
B 20181219 - 53	0	0	pre pandemia
B 20181219 - 54	0	0	pre pandemia
B 20181219 - 55	0	0	pre pandemia
B 20181219 - 56	0	0	pre pandemia
B 20181219 - 57	0	0	pre pandemia
B 20181219 - 58	0	0	pre pandemia
B 20181219 - 59	0	0	pre pandemia
B 20181219 - 60	0	0	pre pandemia
B 20181219 - 61	0	0	pre pandemia
B 20181219 - 62	0	0	pre pandemia
B 20181219 - 63	0	0	pre pandemia
B 20181219 - 64	0	0	pre pandemia
B 20181219 - 65	0	0	pre pandemia
B 20181219 - 66	1	0	pre pandemia
B 20181219 - 67	0	0	pre pandemia
B 20181219 - 68	0	0	pre pandemia
B 20181219 - 69	0	0	pre pandemia
B 20181219 - 70	1	0	pre pandemia
B 20181219 - 71	0	0	pre pandemia
B 20181219 - 72	0	0	pre pandemia
B 20181219 - 73	0	0	pre pandemia
B 20181219 - 74	1	0	pre pandemia
B 20181219 - 75	0	0	pre pandemia
B 20181219 - 76	0	0	pre pandemia
B 20181219 - 77	0	0	pre pandemia
B 20181219 - 78	0	0	pre pandemia
B 20181219 - 79	0	0	pre pandemia
B 20181219 - 80	0	0	pre pandemia
B 20181219 - 81	0	0	pre pandemia
B 20181219 - 82	0	0	pre pandemia
B 20181219 - 83	0	0	pre pandemia
B 20181219 - 84	0	0	pre pandemia
B 20181219 - 85	0	0	pre pandemia
B 20181219 - 86	0	0	pre pandemia
B 20181219 - 87	0	0	pre pandemia
B 20181219 - 88	0	0	pre pandemia
B 20181219 - 89	0	0	pre pandemia
B 20181219 - 90	0	0	pre pandemia
B 20181219 - 91	0	0	pre pandemia
B 20181219 - 92	0	0	pre pandemia
B 20181219 - 93	0	0	pre pandemia
B 20181219 - 94	0	0	pre pandemia
B 20181219 - 95	0	0	pre pandemia
B 20190122 - 01	0	0	pre pandemia
B 20190122 - 02	0	0	pre pandemia
B 20190122 - 03	1	0	pre pandemia
B 20190122 - 04	0	0	pre pandemia
B 20190122 - 05	0	0	pre pandemia
B 20190122 - 06	0	0	pre pandemia
B 20190122 - 07	0	0	pre pandemia
B 20190122 - 08	0	0	pre pandemia
B 20190122 - 09	0	0	pre pandemia
B 20190122 - 10	0	0	pre pandemia
B 20190122 - 11	0	0	pre pandemia
B 20190122 - 12	0	0	pre pandemia
B 20190122 - 13	0	0	pre pandemia
B 20190122 - 14	0	0	pre pandemia
B 20190122 - 15	0	0	pre pandemia
B 20190219 - 01	0	0	pre pandemia
B 20190219 - 02	0	0	pre pandemia
B 20190219 - 03	0	0	pre pandemia
B 20190219 - 04	0	0	pre pandemia
B 20190219 - 05	0	0	pre pandemia
B 20190219 - 06	0	0	pre pandemia
B 20190219 - 07	0	0	pre pandemia
B 20190219 - 08	0	0	pre pandemia
B 20190219 - 09	0	0	pre pandemia
B 20190219 - 10	0	0	pre pandemia
B 20190219 - 11	0	0	pre pandemia
B 20190722 - 01	0	0	pre pandemia
B 20190722 - 02	1	0	pre pandemia
B 20190722 - 03	0	0	pre pandemia
B 20190722 - 04	0	0	pre pandemia
B 20190722 - 05	0	0	pre pandemia
B 20190722 - 06	0	0	pre pandemia
B 20190722 - 07	0	0	pre pandemia
B 20190722 - 08	0	0	pre pandemia
B 20190722 - 09	0	0	pre pandemia
B 20190722 - 10	0	0	pre pandemia
B 20190722 - 11	0	0	pre pandemia
B 20190722 - 12	0	0	pre pandemia
B 20190722 - 13	0	0	pre pandemia
B 20190722 - 14	0	0	pre pandemia
B 20190722 - 15	0	0	pre pandemia
B 20190722 - 16	0	0	pre pandemia
B 20190722 - 17	0	0	pre pandemia
B 20190722 - 18	0	0	pre pandemia
B 20190722 - 19	0	0	pre pandemia
B 20190722 - 20	0	0	pre pandemia
B 20190722 - 21	0	0	pre pandemia
B 20190722 - 22	0	0	pre pandemia
B 20190722 - 23	0	0	pre pandemia
B 20190722 - 24	0	0	pre pandemia
B 20190722 - 25	0	0	pre pandemia
B 20190722 - 26	0	0	pre pandemia
B 20190722 - 27	1	0	pre pandemia
B 20190722 - 28	0	0	pre pandemia
B 20190722 - 29	1	0	pre pandemia
B 20190722 - 30	0	0	pre pandemia
B 20190722 - 31	0	0	pre pandemia
B 20190722 - 32	0	0	pre pandemia
B 20190722 - 33	0	0	pre pandemia
B 20190722 - 34	0	0	pre pandemia
B 20190722 - 35	0	0	pre pandemia
B 20190722 - 36	0	0	pre pandemia
B 20190722 - 37	0	0	pre pandemia
B 20190722 - 38	0	0	pre pandemia
B 20190722 - 39	0	0	pre pandemia
B 20190722 - 40	0	0	pre pandemia
B 20190722 - 41	0	0	pre pandemia
B 20190722 - 42	0	0	pre pandemia
B 20190722 - 43	0	0	pre pandemia
B 20190722 - 44	0	0	pre pandemia
B 20190722 - 45	0	0	pre pandemia
B 20190722 - 46	0	0	pre pandemia
B 20190722 - 47	0	0	pre pandemia
B 20190722 - 48	0	0	pre pandemia
B 20190722 - 49	1	0	pre pandemia
B 20190722 - 50	0	0	pre pandemia
B 20190722 - 51	0	0	pre pandemia
B 20190722 - 52	0	0	pre pandemia
B 20190722 - 53	0	0	pre pandemia
B 20190722 - 54	0	0	pre pandemia
B 20190722 - 55	0	0	pre pandemia
B 20190722 - 56	0	0	pre pandemia
B 20190722 - 57	0	0	pre pandemia
B 20190722 - 58	0	0	pre pandemia
B 20190722 - 59	0	0	pre pandemia
B 20190722 - 60	0	0	pre pandemia
B 20190722 - 61	0	0	pre pandemia
B 20190722 - 62	0	0	pre pandemia
B 20190722 - 63	0	0	pre pandemia
B 20190722 - 64	0	0	pre pandemia
B 20190722 - 65	0	0	pre pandemia
B 20190722 - 66	0	0	pre pandemia
B 20190722 - 67	0	0	pre pandemia
B 20190722 - 68	0	0	pre pandemia
B 20190722 - 69	0	0	pre pandemia
B 20190722 - 70	0	0	pre pandemia
B 20190722 - 71	0	0	pre pandemia
B 20190722 - 72	0	0	pre pandemia
B 20190722 - 73	0	0	pre pandemia
B 20190722 - 74	0	0	pre pandemia
B 20190722 - 75	0	0	pre pandemia
B 20190722 - 76	0	0	pre pandemia
B 20190722 - 77	0	0	pre pandemia
B 20190823 - 01	0	0	pre pandemia
B 20190823 - 02	0	0	pre pandemia
B 20190823 - 03	0	0	pre pandemia
B 20190823 - 04	0	0	pre pandemia
B 20190823 - 05	0	0	pre pandemia
B 20190823 - 06	0	0	pre pandemia
B 20190823 - 07	0	0	pre pandemia
B 20190823 - 08	0	0	pre pandemia
B 20190823 - 09	0	0	pre pandemia
B 20190823 - 10	0	0	pre pandemia
B 20190823 - 11	0	0	pre pandemia
B 20190823 - 12	0	0	pre pandemia
B 20190823 - 13	0	0	pre pandemia
B 20190823 - 14	0	0	pre pandemia
B 20190823 - 15	0	0	pre pandemia
B 20190823 - 16	0	0	pre pandemia
B 20190823 - 17	0	0	pre pandemia
B 20190823 - 18	0	0	pre pandemia
B 20190823 - 19	0	0	pre pandemia
B 20190823 - 20	0	0	pre pandemia
B 20190823 - 21	0	0	pre pandemia
B 20190823 - 22	0	0	pre pandemia
B 20190823 - 23	0	0	pre pandemia
B 20190823 - 24	0	0	pre pandemia
B 20190823 - 25	0	0	pre pandemia
B 20190823 - 26	0	0	pre pandemia
B 20190823 - 27	0	0	pre pandemia
B 20190823 - 28	0	0	pre pandemia
B 20190823 - 29	0	0	pre pandemia
B 20190823 - 30	0	0	pre pandemia
B 20190823 - 31	1	0	pre pandemia
B 20190823 - 32	0	0	pre pandemia
B 20190823 - 33	1	0	pre pandemia
B 20190823 - 34	0	0	pre pandemia
B 20190823 - 35	0	0	pre pandemia
B 20190823 - 36	0	0	pre pandemia
B 20190823 - 37	0	0	pre pandemia
B 20190823 - 38	0	0	pre pandemia
B 20190823 - 39	0	0	pre pandemia
B 20190823 - 40	0	0	pre pandemia
B 20190823 - 41	0	0	pre pandemia
B 20190823 - 42	0	0	pre pandemia
B 20190823 - 43	0	0	pre pandemia
B 20190823 - 44	0	0	pre pandemia
B 20190823 - 45	0	0	pre pandemia
B 20190823 - 46	0	0	pre pandemia
B 20190823 - 47	0	0	pre pandemia
B 20190823 - 48	0	0	pre pandemia
B 20190823 - 49	0	0	pre pandemia
B 20190823 - 50	0	0	pre pandemia
B 20190823 - 51	0	0	pre pandemia
B 20190823 - 52	0	0	pre pandemia
B 20190823 - 53	0	0	pre pandemia
B 20190823 - 54	0	0	pre pandemia
B 20190823 - 55	0	0	pre pandemia
B 20190823 - 56	0	0	pre pandemia
B 20190823 - 57	0	0	pre pandemia
B 20190823 - 58	0	0	pre pandemia
B 20190823 - 59	0	0	pre pandemia
B 20190823 - 60	1	0	pre pandemia
B 20190930 - 01	0	0	pre pandemia
B 20190930 - 02	1	0	pre pandemia
B 20190930 - 03	1	0	pre pandemia
B 20190930 - 04	0	0	pre pandemia
B 20190930 - 05	1	0	pre pandemia
B 20190930 - 06	0	0	pre pandemia
B 20190930 - 07	0	0	pre pandemia
B 20190930 - 08	0	0	pre pandemia
B 20190930 - 09	0	0	pre pandemia
B 20190930 - 10	0	0	pre pandemia
B 20190930 - 11	1	0	pre pandemia
B 20190930 - 12	0	0	pre pandemia
B 20190930 - 13	0	0	pre pandemia
B 20190930 - 14	0	0	pre pandemia
B 20190930 - 15	0	0	pre pandemia
B 20190930 - 16	0	0	pre pandemia
B 20190930 - 17	0	0	pre pandemia
B 20190930 - 18	0	0	pre pandemia
B 20190930 - 19	0	0	pre pandemia
B 20190930 - 20	0	0	pre pandemia
B 20190930 - 21	0	0	pre pandemia
B 20190930 - 22	0	0	pre pandemia
B 20190930 - 23	0	0	pre pandemia
B 20190930 - 24	0	0	pre pandemia
B 20190930 - 25	0	0	pre pandemia
B 20190930 - 26	1	0	pre pandemia
B 20190930 - 27	0	0	pre pandemia
B 20190930 - 28	0	0	pre pandemia
B 20190930 - 29	0	0	pre pandemia
B 20190930 - 30	0	0	pre pandemia
B 20190930 - 31	0	0	pre pandemia
B 20190930 - 32	0	0	pre pandemia
B 20190930 - 33	0	0	pre pandemia
B 20190930 - 34	0	0	pre pandemia
B 20190930 - 35	0	0	pre pandemia
B 20191027 - 01	0	0	pre pandemia
B 20191027 - 02	0	0	pre pandemia
B 20191027 - 03	0	0	pre pandemia
B 20191027 - 04	0	0	pre pandemia
B 20191027 - 05	0	0	pre pandemia
B 20191027 - 06	0	0	pre pandemia
B 20191027 - 07	1	0	pre pandemia
B 20191027 - 08	0	0	pre pandemia
B 20191027 - 09	0	0	pre pandemia
B 20191027 - 10	0	0	pre pandemia
B 20191027 - 11	0	0	pre pandemia
B 20191027 - 12	0	0	pre pandemia
B 20191027 - 13	0	0	pre pandemia
B 20191027 - 14	0	0	pre pandemia
B 20191027 - 15	0	0	pre pandemia
B 20191027 - 16	0	0	pre pandemia
B 20191027 - 17	0	0	pre pandemia
B 20191027 - 18	0	0	pre pandemia
B 20191027 - 19	0	0	pre pandemia
B 20191027 - 20	0	0	pre pandemia
B 20191027 - 21	0	0	pre pandemia
B 20191027 - 22	1	0	pre pandemia
B 20191027 - 23	0	0	pre pandemia
B 20191027 - 24	0	0	pre pandemia
B 20191027 - 25	0	0	pre pandemia
B 20191027 - 26	0	0	pre pandemia
B 20191027 - 27	0	0	pre pandemia
B 20191027 - 28	0	0	pre pandemia
B 20191027 - 29	1	0	pre pandemia
B 20191027 - 30	0	0	pre pandemia
B 20191027 - 31	0	0	pre pandemia
B 20191027 - 32	0	0	pre pandemia
B 20191027 - 33	0	0	pre pandemia
B 20191027 - 34	0	0	pre pandemia
B 20191027 - 35	0	0	pre pandemia
B 20191027 - 36	0	0	pre pandemia
B 20191027 - 37	0	0	pre pandemia
B 20191027 - 38	0	0	pre pandemia
B 20191027 - 39	0	0	pre pandemia
B 20191027 - 40	0	0	pre pandemia
B 20191027 - 41	0	0	pre pandemia
B 20191027 - 42	0	0	pre pandemia
B 20191027 - 43	0	0	pre pandemia
B 20191027 - 44	0	0	pre pandemia
B 20191027 - 45	0	0	pre pandemia
B 20191027 - 46	0	0	pre pandemia
B 20191027 - 47	0	0	pre pandemia
B 20191027 - 48	0	0	pre pandemia
B 20191027 - 49	0	0	pre pandemia
B 20191027 - 50	0	0	pre pandemia
B 20191027 - 51	0	0	pre pandemia
B 20191027 - 52	0	0	pre pandemia
B 20191027 - 53	0	0	pre pandemia
B 20191027 - 54	0	0	pre pandemia
B 20191027 - 55	0	0	pre pandemia
B 20191027 - 56	0	0	pre pandemia
B 20191027 - 57	0	0	pre pandemia
B 20191027 - 58	0	0	pre pandemia
B 20191027 - 59	0	0	pre pandemia
B 20191027 - 60	0	0	pre pandemia
B 20191027 - 61	0	0	pre pandemia
B 20191027 - 62	0	0	pre pandemia
B 20191027 - 63	0	0	pre pandemia
B 20191027 - 64	0	0	pre pandemia
B 20191027 - 65	0	0	pre pandemia
B 20191027 - 66	0	0	pre pandemia
B 20191027 - 67	0	0	pre pandemia
B 20191027 - 68	0	0	pre pandemia
B 20191027 - 69	0	0	pre pandemia
B 20191027 - 70	0	0	pre pandemia
B 20191027 - 71	0	0	pre pandemia
B 20191027 - 72	0	0	pre pandemia
B 20191027 - 73	0	0	pre pandemia
B 20191027 - 74	0	0	pre pandemia
B 20191027 - 75	0	0	pre pandemia
B 20191027 - 76	0	0	pre pandemia
B 20191027 - 77	0	0	pre pandemia
B 20191027 - 78	0	0	pre pandemia
B 20191027 - 79	0	0	pre pandemia
B 20191027 - 80	0	0	pre pandemia
B 20191027 - 81	1	0	pre pandemia
B 20191027 - 82	0	0	pre pandemia
B 20191027 - 83	0	0	pre pandemia
B 20191027 - 84	0	0	pre pandemia
B 20191027 - 85	0	0	pre pandemia
B 20191027 - 86	0	0	pre pandemia
B 20191027 - 87	0	0	pre pandemia
B 20191027 - 88	0	0	pre pandemia
B 20191027 - 89	0	0	pre pandemia
B 20191027 - 90	0	0	pre pandemia
B 20191121 - 01	0	0	pre pandemia
B 20191121 - 02	0	0	pre pandemia
B 20191121 - 03	0	0	pre pandemia
B 20191121 - 04	0	0	pre pandemia
B 20191121 - 05	0	0	pre pandemia
B 20191121 - 06	0	0	pre pandemia
B 20191121 - 07	0	0	pre pandemia
B 20191121 - 08	0	0	pre pandemia
B 20191121 - 09	0	0	pre pandemia
B 20191121 - 10	0	0	pre pandemia
B 20191121 - 11	0	0	pre pandemia
B 20191121 - 12	1	0	pre pandemia
B 20191121 - 13	0	0	pre pandemia
B 20191121 - 14	0	0	pre pandemia
B 20191121 - 15	0	0	pre pandemia
B 20191121 - 16	0	0	pre pandemia
B 20191121 - 17	0	0	pre pandemia
B 20191121 - 18	0	0	pre pandemia
B 20191121 - 19	0	0	pre pandemia
B 20191121 - 20	0	0	pre pandemia
B 20191121 - 21	0	0	pre pandemia
B 20191121 - 22	1	0	pre pandemia
B 20191121 - 23	0	0	pre pandemia
B 20191121 - 24	0	0	pre pandemia
B 20191121 - 25	0	0	pre pandemia
B 20191121 - 26	0	0	pre pandemia
B 20191121 - 27	0	0	pre pandemia
B 20191121 - 28	1	0	pre pandemia
B 20191121 - 29	0	0	pre pandemia
B 20191121 - 30	0	0	pre pandemia
B 20191121 - 31	0	0	pre pandemia
B 20191121 - 32	0	0	pre pandemia
B 20191121 - 33	0	0	pre pandemia
B 20191121 - 34	0	0	pre pandemia
B 20191121 - 35	0	0	pre pandemia
B 20191121 - 36	0	0	pre pandemia
B 20191121 - 37	0	0	pre pandemia
B 20191121 - 38	0	0	pre pandemia
B 20191121 - 39	0	0	pre pandemia
B 20191121 - 40	0	0	pre pandemia
B 20191121 - 41	0	0	pre pandemia
B 20191121 - 42	0	0	pre pandemia
B 20191121 - 43	0	0	pre pandemia
B 20191121 - 44	0	0	pre pandemia
B 20191121 - 45	0	0	pre pandemia
B 20191121 - 46	0	0	pre pandemia
B 20191121 - 47	0	0	pre pandemia
B 20191121 - 48	0	0	pre pandemia
B 20191121 - 49	0	0	pre pandemia
B 20191121 - 50	0	0	pre pandemia
B 20191121 - 51	1	0	pre pandemia
B 20191222 - 01	0	0	pre pandemia
B 20191222 - 02	0	0	pre pandemia
B 20191222 - 03	0	0	pre pandemia
B 20191222 - 04	0	0	pre pandemia
B 20191222 - 05	0	0	pre pandemia
B 20191222 - 06	0	0	pre pandemia
B 20191222 - 07	0	0	pre pandemia
B 20191222 - 08	1	0	pre pandemia
B 20191222 - 09	1	0	pre pandemia
B 20191222 - 10	1	0	pre pandemia
B 20191222 - 11	0	0	pre pandemia
B 20191222 - 12	0	0	pre pandemia
B 20191222 - 13	0	0	pre pandemia
B 20191222 - 14	0	0	pre pandemia
B 20191222 - 15	1	0	pre pandemia
B 20191222 - 16	0	0	pre pandemia
B 20191222 - 17	0	0	pre pandemia
B 20191222 - 18	0	0	pre pandemia
B 20191222 - 19	0	0	pre pandemia
B 20191222 - 20	1	0	pre pandemia
B 20191222 - 21	1	0	pre pandemia
B 20191222 - 22	0	0	pre pandemia
B 20191222 - 23	0	0	pre pandemia
B 20191222 - 24	0	0	pre pandemia
B 20191222 - 25	0	0	pre pandemia
B 20191222 - 26	0	0	pre pandemia
B 20191222 - 27	1	0	pre pandemia
B 20191222 - 28	0	0	pre pandemia
B 20191222 - 29	0	0	pre pandemia
B 20191222 - 30	0	0	pre pandemia
B 20191222 - 31	0	0	pre pandemia
B 20191222 - 32	0	0	pre pandemia
B 20191222 - 33	0	0	pre pandemia
B 20191222 - 34	0	0	pre pandemia
B 20191222 - 35	0	0	pre pandemia
B 20191222 - 36	0	0	pre pandemia
B 20191222 - 37	0	0	pre pandemia
B 20191222 - 38	1	0	pre pandemia
B 20191222 - 39	0	0	pre pandemia
B 20191222 - 40	1	0	pre pandemia
B 20191222 - 41	0	0	pre pandemia
B 20191222 - 42	0	0	pre pandemia
B 20191222 - 43	0	0	pre pandemia
B 20191222 - 44	0	0	pre pandemia
B 20191222 - 45	1	0	pre pandemia
B 20191222 - 46	1	0	pre pandemia
B 20191222 - 47	1	0	pre pandemia
B 20191222 - 48	1	0	pre pandemia
B 20191222 - 49	0	0	pre pandemia
B 20191222 - 50	0	0	pre pandemia
B 20191222 - 51	0	0	pre pandemia
B 20191222 - 52	0	0	pre pandemia
B 20191222 - 53	0	0	pre pandemia
B 20191222 - 54	0	0	pre pandemia
B 20191222 - 55	1	0	pre pandemia
B 20191222 - 56	0	0	pre pandemia
B 20191222 - 57	0	0	pre pandemia
B 20191222 - 58	1	0	pre pandemia
B 20191222 - 59	1	0	pre pandemia
B 20191222 - 60	0	0	pre pandemia
B 20191222 - 61	0	0	pre pandemia
B 20191222 - 62	0	0	pre pandemia
B 20191222 - 63	0	0	pre pandemia
B 20191222 - 64	0	0	pre pandemia
B 20191222 - 65	0	0	pre pandemia
B 20191222 - 66	0	0	pre pandemia
B 20191222 - 67	0	0	pre pandemia
B 20191222 - 68	0	0	pre pandemia
B 20191222 - 69	0	0	pre pandemia
B 20191222 - 70	0	0	pre pandemia
B 20191222 - 71	0	0	pre pandemia
B 20191222 - 72	0	0	pre pandemia
B 20191222 - 73	0	0	pre pandemia
B 20191222 - 74	0	0	pre pandemia
B 20191222 - 75	0	0	pre pandemia
B 20191222 - 76	0	0	pre pandemia
B 20191222 - 77	0	0	pre pandemia
B 20191222 - 78	0	0	pre pandemia
B 20191222 - 79	0	0	pre pandemia
B 20191222 - 80	0	0	pre pandemia
B 20191222 - 81	0	0	pre pandemia
B 20191222 - 82	0	0	pre pandemia
B 20191222 - 83	0	0	pre pandemia
B 20191222 - 84	0	0	pre pandemia
B 20191222 - 85	0	0	pre pandemia
B 20191222 - 86	0	0	pre pandemia
B 20191222 - 87	0	0	pre pandemia
B 20191222 - 88	0	0	pre pandemia
B 20191222 - 89	0	0	pre pandemia
B 20191222 - 90	0	0	pre pandemia
B 20200708 - 01	0	1	pandemia total
B 20200708 - 02	0	1	pandemia total
B 20200708 - 03	0	1	pandemia total
B 20200708 - 04	0	1	pandemia total
B 20200708 - 05	0	1	pandemia total
B 20200708 - 06	0	1	pandemia total
B 20200708 - 07	0	1	pandemia total
B 20200708 - 08	0	1	pandemia total
B 20200708 - 09	0	1	pandemia total
B 20200708 - 10	0	1	pandemia total
B 20200708 - 11	0	1	pandemia total
B 20200722 - 01	0	1	pandemia total
B 20200722 - 02	0	1	pandemia total
B 20200722 - 03	0	1	pandemia total
B 20200722 - 04	0	1	pandemia total
B 20200722 - 05	0	1	pandemia total
B 20200722 - 06	0	1	pandemia total
B 20200722 - 07	0	1	pandemia total
B 20200722 - 08	0	1	pandemia total
B 20200722 - 09	0	1	pandemia total
B 20200722 - 10	0	1	pandemia total
B 20200722 - 11	0	1	pandemia total
B 20200722 - 12	0	1	pandemia total
B 20200722 - 13	0	1	pandemia total
B 20200722 - 14	0	1	pandemia total
B 20200818 - 01	0	1	pandemia total
B 20200818 - 02	0	1	pandemia total
B 20200818 - 03	0	1	pandemia total
B 20200818 - 04	0	1	pandemia total
B 20200818 - 05	0	1	pandemia total
B 20200818 - 06	0	1	pandemia total
B 20200818 - 07	0	1	pandemia total
B 20200818 - 08	0	1	pandemia total
B 20200818 - 09	0	1	pandemia total
B 20200818 - 10	0	1	pandemia total
B 20200818 - 11	0	1	pandemia total
B 20200818 - 12	0	1	pandemia total
B 20200818 - 13	0	1	pandemia total
B 20200818 - 14	0	1	pandemia total
B 20200818 - 15	0	1	pandemia total
B 20200818 - 16	0	1	pandemia total
B 20200818 - 17	0	1	pandemia total
B 20200818 - 18	0	1	pandemia total
B 20200922 - 01	0	1	pandemia total
B 20200922 - 02	0	1	pandemia total
B 20200922 - 03	0	1	pandemia total
B 20200922 - 04	0	1	pandemia total
B 20200922 - 05	0	1	pandemia total
B 20200922 - 06	0	1	pandemia total
B 20200922 - 07	0	1	pandemia total
B 20200922 - 08	0	1	pandemia total
B 20200922 - 09	0	1	pandemia total
B 20200922 - 10	0	1	pandemia total
B 20200922 - 11	0	1	pandemia total
B 20200922 - 12	0	1	pandemia total
B 20200922 - 13	0	1	pandemia total
B 20200922 - 14	0	1	pandemia total
B 20200922 - 15	0	1	pandemia total
B 20200922 - 16	0	1	pandemia total
B 20200922 - 17	0	1	pandemia total
B 20200922 - 18	0	1	pandemia total
B 20201025 - 01	0	2	pandemia parcial
B 20201025 - 02	0	2	pandemia parcial
B 20201025 - 03	0	2	pandemia parcial
B 20201025 - 04	0	2	pandemia parcial
B 20201025 - 05	0	2	pandemia parcial
B 20201025 - 06	0	2	pandemia parcial
B 20201025 - 07	1	2	pandemia parcial
B 20201025 - 08	0	2	pandemia parcial
B 20201025 - 09	0	2	pandemia parcial
B 20201025 - 10	0	2	pandemia parcial
B 20201025 - 11	0	2	pandemia parcial
B 20201025 - 12	0	2	pandemia parcial
B 20201025 - 13	0	2	pandemia parcial
B 20201025 - 14	0	2	pandemia parcial
B 20201025 - 15	0	2	pandemia parcial
B 20201025 - 16	1	2	pandemia parcial
B 20201025 - 17	0	2	pandemia parcial
B 20201025 - 18	0	2	pandemia parcial
B 20201025 - 19	0	2	pandemia parcial
B 20201025 - 20	0	2	pandemia parcial
B 20201025 - 21	0	2	pandemia parcial
B 20201025 - 22	0	2	pandemia parcial
B 20201025 - 23	0	2	pandemia parcial
B 20201025 - 24	0	2	pandemia parcial
B 20201025 - 25	0	2	pandemia parcial
B 20201025 - 26	0	2	pandemia parcial
B 20201025 - 27	0	2	pandemia parcial
B 20201025 - 28	0	2	pandemia parcial
B 20201025 - 29	0	2	pandemia parcial
B 20201025 - 30	0	2	pandemia parcial
B 20201025 - 31	0	2	pandemia parcial
B 20201025 - 32	0	2	pandemia parcial
B 20201025 - 33	0	2	pandemia parcial
B 20201025 - 34	0	2	pandemia parcial
B 20201025 - 35	0	2	pandemia parcial
B 20201025 - 36	0	2	pandemia parcial
B 20201025 - 37	0	2	pandemia parcial
B 20201025 - 38	0	2	pandemia parcial
B 20201025 - 39	0	2	pandemia parcial
B 20201025 - 40	0	2	pandemia parcial
B 20201025 - 41	0	2	pandemia parcial
B 20201025 - 42	0	2	pandemia parcial
B 20201025 - 43	0	2	pandemia parcial
B 20201025 - 44	0	2	pandemia parcial
B 20201025 - 45	0	2	pandemia parcial
B 20201025 - 46	0	2	pandemia parcial
B 20201025 - 47	0	2	pandemia parcial
B 20201025 - 48	0	2	pandemia parcial
B 20201025 - 49	0	2	pandemia parcial
B 20201025 - 50	0	2	pandemia parcial
B 20201025 - 51	0	2	pandemia parcial
B 20201025 - 52	0	2	pandemia parcial
B 20201025 - 53	0	2	pandemia parcial
B 20201025 - 54	0	2	pandemia parcial
B 20201025 - 55	0	2	pandemia parcial
B 20201025 - 56	0	2	pandemia parcial
B 20201025 - 57	0	2	pandemia parcial
B 20201025 - 58	0	2	pandemia parcial
B 20201025 - 59	0	2	pandemia parcial
B 20201025 - 60	0	2	pandemia parcial
B 20201025 - 61	0	2	pandemia parcial
B 20201025 - 62	0	2	pandemia parcial
B 20201025 - 63	0	2	pandemia parcial
B 20201025 - 64	0	2	pandemia parcial
B 20201025 - 65	0	2	pandemia parcial
B 20201025 - 66	0	2	pandemia parcial
B 20201101 - 01	0	2	pandemia parcial
B 20201101 - 02	0	2	pandemia parcial
B 20201101 - 03	0	2	pandemia parcial
B 20201101 - 04	0	2	pandemia parcial
B 20201101 - 05	0	2	pandemia parcial
B 20201101 - 06	0	2	pandemia parcial
B 20201101 - 07	0	2	pandemia parcial
B 20201101 - 08	0	2	pandemia parcial
B 20201101 - 09	0	2	pandemia parcial
B 20201101 - 10	0	2	pandemia parcial
B 20201101 - 11	0	2	pandemia parcial
B 20201101 - 12	0	2	pandemia parcial
B 20201101 - 13	0	2	pandemia parcial
B 20201101 - 14	0	2	pandemia parcial
B 20201101 - 15	0	2	pandemia parcial
B 20201101 - 16	0	2	pandemia parcial
B 20201101 - 17	0	2	pandemia parcial
B 20201101 - 18	0	2	pandemia parcial
B 20201101 - 19	0	2	pandemia parcial
B 20201101 - 20	0	2	pandemia parcial
B 20201101 - 21	0	2	pandemia parcial
B 20201101 - 22	0	2	pandemia parcial
B 20201101 - 23	0	2	pandemia parcial
B 20201101 - 24	0	2	pandemia parcial
B 20201101 - 25	0	2	pandemia parcial
B 20201101 - 26	0	2	pandemia parcial
B 20201101 - 27	0	2	pandemia parcial
B 20201101 - 28	0	2	pandemia parcial
B 20201101 - 29	0	2	pandemia parcial
B 20201101 - 30	0	2	pandemia parcial
B 20201101 - 31	0	2	pandemia parcial
B 20201101 - 32	0	2	pandemia parcial
B 20201101 - 33	0	2	pandemia parcial
B 20201101 - 34	0	2	pandemia parcial
B 20201101 - 35	0	2	pandemia parcial
B 20201101 - 36	0	2	pandemia parcial
B 20201101 - 37	0	2	pandemia parcial
B 20201101 - 38	0	2	pandemia parcial
B 20201101 - 39	0	2	pandemia parcial
B 20201101 - 40	0	2	pandemia parcial
B 20201101 - 41	0	2	pandemia parcial
B 20201101 - 42	0	2	pandemia parcial
B 20201101 - 43	0	2	pandemia parcial
B 20201101 - 44	0	2	pandemia parcial
B 20201101 - 45	0	2	pandemia parcial
B 20201101 - 46	0	2	pandemia parcial
B 20201101 - 47	0	2	pandemia parcial
B 20201101 - 48	0	2	pandemia parcial
B 20201101 - 49	0	2	pandemia parcial
B 20201101 - 50	0	2	pandemia parcial
B 20201101 - 51	0	2	pandemia parcial
B 20201101 - 52	0	2	pandemia parcial
B 20201101 - 53	0	2	pandemia parcial
B 20201101 - 54	0	2	pandemia parcial
B 20201101 - 55	0	2	pandemia parcial
B 20201101 - 56	0	2	pandemia parcial
B 20201101 - 57	0	2	pandemia parcial
B 20201101 - 58	0	2	pandemia parcial
B 20201101 - 59	0	2	pandemia parcial
B 20201101 - 60	1	2	pandemia parcial
B 20201101 - 61	0	2	pandemia parcial
B 20201101 - 62	0	2	pandemia parcial
B 20201101 - 63	0	2	pandemia parcial
B 20201101 - 64	0	2	pandemia parcial
B 20201101 - 65	0	2	pandemia parcial
B 20201101 - 66	0	2	pandemia parcial
B 20201101 - 67	0	2	pandemia parcial
B 20201101 - 68	0	2	pandemia parcial
B 20201101 - 69	0	2	pandemia parcial
B 20201101 - 70	0	2	pandemia parcial
B 20201101 - 71	0	2	pandemia parcial
B 20201101 - 72	0	2	pandemia parcial
B 20201101 - 73	0	2	pandemia parcial
B 20201101 - 74	0	2	pandemia parcial
B 20201101 - 75	0	2	pandemia parcial
B 20201101 - 76	0	2	pandemia parcial
B 20201101 - 77	0	2	pandemia parcial
B 20201108 - 01	0	2	pandemia parcial
B 20201108 - 02	0	2	pandemia parcial
B 20201108 - 03	0	2	pandemia parcial
B 20201108 - 04	0	2	pandemia parcial
B 20201108 - 05	0	2	pandemia parcial
B 20201108 - 06	0	2	pandemia parcial
B 20201108 - 07	0	2	pandemia parcial
B 20201108 - 08	0	2	pandemia parcial
B 20201108 - 09	0	2	pandemia parcial
B 20201108 - 10	0	2	pandemia parcial
B 20201108 - 11	0	2	pandemia parcial
B 20201108 - 12	0	2	pandemia parcial
B 20201108 - 13	0	2	pandemia parcial
B 20201108 - 14	0	2	pandemia parcial
B 20201108 - 15	0	2	pandemia parcial
B 20201108 - 16	0	2	pandemia parcial
B 20201108 - 17	0	2	pandemia parcial
B 20201108 - 18	0	2	pandemia parcial
B 20201108 - 19	0	2	pandemia parcial
B 20201108 - 20	0	2	pandemia parcial
B 20201108 - 21	0	2	pandemia parcial
B 20201108 - 22	0	2	pandemia parcial
B 20201108 - 23	0	2	pandemia parcial
B 20201108 - 24	0	2	pandemia parcial
B 20201108 - 25	0	2	pandemia parcial
B 20201108 - 26	0	2	pandemia parcial
B 20201108 - 27	0	2	pandemia parcial
B 20201108 - 28	0	2	pandemia parcial
B 20201108 - 29	0	2	pandemia parcial
B 20201108 - 30	0	2	pandemia parcial
B 20201108 - 31	0	2	pandemia parcial
B 20201108 - 32	0	2	pandemia parcial
B 20201108 - 33	0	2	pandemia parcial
B 20201108 - 34	0	2	pandemia parcial
B 20201108 - 35	0	2	pandemia parcial
B 20201108 - 36	0	2	pandemia parcial
B 20201108 - 37	0	2	pandemia parcial
B 20201108 - 38	0	2	pandemia parcial
B 20201108 - 39	0	2	pandemia parcial
B 20201108 - 40	0	2	pandemia parcial
B 20201108 - 41	0	2	pandemia parcial
B 20201108 - 42	0	2	pandemia parcial
B 20201108 - 43	0	2	pandemia parcial
B 20201108 - 44	0	2	pandemia parcial
B 20201108 - 45	0	2	pandemia parcial
B 20201108 - 46	0	2	pandemia parcial
B 20201108 - 47	0	2	pandemia parcial
B 20201108 - 48	0	2	pandemia parcial
B 20201115 - 01	0	2	pandemia parcial
B 20201115 - 02	0	2	pandemia parcial
B 20201115 - 03	0	2	pandemia parcial
B 20201115 - 04	0	2	pandemia parcial
B 20201115 - 05	0	2	pandemia parcial
B 20201115 - 06	0	2	pandemia parcial
B 20201115 - 07	0	2	pandemia parcial
B 20201115 - 08	0	2	pandemia parcial
B 20201115 - 09	0	2	pandemia parcial
B 20201115 - 10	0	2	pandemia parcial
B 20201115 - 11	0	2	pandemia parcial
B 20201115 - 12	0	2	pandemia parcial
B 20201115 - 13	0	2	pandemia parcial
B 20201115 - 14	0	2	pandemia parcial
B 20201115 - 15	0	2	pandemia parcial
B 20201115 - 16	0	2	pandemia parcial
B 20201115 - 17	0	2	pandemia parcial
B 20201115 - 18	1	2	pandemia parcial
B 20201115 - 19	0	2	pandemia parcial
B 20201115 - 20	0	2	pandemia parcial
B 20201115 - 21	0	2	pandemia parcial
B 20201115 - 22	0	2	pandemia parcial
B 20201115 - 23	0	2	pandemia parcial
B 20201115 - 24	0	2	pandemia parcial
B 20201115 - 25	0	2	pandemia parcial
B 20201115 - 26	0	2	pandemia parcial
B 20201115 - 27	0	2	pandemia parcial
B 20201115 - 28	0	2	pandemia parcial
B 20201115 - 29	0	2	pandemia parcial
B 20201115 - 30	0	2	pandemia parcial
B 20201115 - 31	0	2	pandemia parcial
B 20201115 - 32	0	2	pandemia parcial
B 20201115 - 33	0	2	pandemia parcial
B 20201115 - 34	0	2	pandemia parcial
B 20201115 - 35	0	2	pandemia parcial
B 20201115 - 36	0	2	pandemia parcial
B 20201115 - 37	0	2	pandemia parcial
B 20201115 - 38	0	2	pandemia parcial
B 20201115 - 39	0	2	pandemia parcial
B 20201115 - 40	0	2	pandemia parcial
B 20201115 - 41	0	2	pandemia parcial
B 20201115 - 42	0	2	pandemia parcial
B 20201115 - 43	0	2	pandemia parcial
B 20201115 - 44	0	2	pandemia parcial
B 20201115 - 45	0	2	pandemia parcial
B 20201115 - 46	0	2	pandemia parcial
B 20201115 - 47	0	2	pandemia parcial
B 20201122 - 01	0	2	pandemia parcial
B 20201122 - 02	0	2	pandemia parcial
B 20201122 - 03	0	2	pandemia parcial
B 20201122 - 04	0	2	pandemia parcial
B 20201122 - 05	0	2	pandemia parcial
B 20201122 - 06	0	2	pandemia parcial
B 20201122 - 07	0	2	pandemia parcial
B 20201122 - 08	0	2	pandemia parcial
B 20201122 - 09	0	2	pandemia parcial
B 20201122 - 10	0	2	pandemia parcial
B 20201122 - 11	0	2	pandemia parcial
B 20201122 - 12	0	2	pandemia parcial
B 20201122 - 13	0	2	pandemia parcial
B 20201122 - 14	0	2	pandemia parcial
B 20201122 - 15	0	2	pandemia parcial
B 20201122 - 16	0	2	pandemia parcial
B 20201122 - 17	0	2	pandemia parcial
B 20201122 - 18	0	2	pandemia parcial
B 20201122 - 19	1	2	pandemia parcial
B 20201122 - 20	0	2	pandemia parcial
B 20201122 - 21	0	2	pandemia parcial
B 20201122 - 22	0	2	pandemia parcial
B 20201122 - 23	0	2	pandemia parcial
B 20201122 - 24	0	2	pandemia parcial
B 20201122 - 25	0	2	pandemia parcial
B 20201122 - 26	0	2	pandemia parcial
B 20201122 - 27	0	2	pandemia parcial
B 20201122 - 28	0	2	pandemia parcial
B 20201122 - 29	0	2	pandemia parcial
B 20201122 - 30	0	2	pandemia parcial
B 20201122 - 31	0	2	pandemia parcial
B 20201122 - 32	0	2	pandemia parcial
B 20201122 - 33	0	2	pandemia parcial
B 20201122 - 34	0	2	pandemia parcial
B 20201122 - 35	0	2	pandemia parcial
B 20201122 - 36	0	2	pandemia parcial
B 20201122 - 37	0	2	pandemia parcial
B 20201122 - 38	0	2	pandemia parcial
B 20201122 - 39	0	2	pandemia parcial
B 20201122 - 40	0	2	pandemia parcial
B 20201122 - 41	0	2	pandemia parcial
B 20201122 - 42	0	2	pandemia parcial
B 20201129 - 01	0	2	pandemia parcial
B 20201129 - 02	0	2	pandemia parcial
B 20201129 - 03	0	2	pandemia parcial
B 20201129 - 04	0	2	pandemia parcial
B 20201129 - 05	0	2	pandemia parcial
B 20201129 - 06	0	2	pandemia parcial
B 20201129 - 07	0	2	pandemia parcial
B 20201129 - 08	0	2	pandemia parcial
B 20201129 - 09	0	2	pandemia parcial
B 20201129 - 10	0	2	pandemia parcial
B 20201129 - 11	1	2	pandemia parcial
B 20201129 - 12	0	2	pandemia parcial
B 20201129 - 13	0	2	pandemia parcial
B 20201129 - 14	1	2	pandemia parcial
B 20201129 - 15	0	2	pandemia parcial
B 20201129 - 16	0	2	pandemia parcial
B 20201129 - 17	0	2	pandemia parcial
B 20201129 - 18	0	2	pandemia parcial
B 20201129 - 19	0	2	pandemia parcial
B 20201129 - 20	0	2	pandemia parcial
B 20201129 - 21	0	2	pandemia parcial
B 20201129 - 22	0	2	pandemia parcial
B 20201129 - 23	0	2	pandemia parcial
B 20201129 - 24	0	2	pandemia parcial
B 20201129 - 25	0	2	pandemia parcial
B 20201129 - 26	0	2	pandemia parcial
B 20201129 - 27	0	2	pandemia parcial
B 20201129 - 28	0	2	pandemia parcial
B 20201129 - 29	0	2	pandemia parcial
B 20201129 - 30	0	2	pandemia parcial
B 20201129 - 31	0	2	pandemia parcial
B 20201129 - 32	0	2	pandemia parcial
B 20201129 - 33	0	2	pandemia parcial
B 20201129 - 34	0	2	pandemia parcial
B 20201129 - 35	0	2	pandemia parcial
B 20201129 - 36	0	2	pandemia parcial
B 20201129 - 37	0	2	pandemia parcial
B 20201129 - 38	0	2	pandemia parcial
B 20201129 - 39	0	2	pandemia parcial
B 20201129 - 40	0	2	pandemia parcial
B 20201129 - 41	0	2	pandemia parcial
B 20201129 - 42	0	2	pandemia parcial
B 20201129 - 43	0	2	pandemia parcial
B 20201129 - 44	0	2	pandemia parcial
B 20201129 - 45	0	2	pandemia parcial
B 20201129 - 46	0	2	pandemia parcial
B 20201129 - 47	0	2	pandemia parcial
B 20201129 - 48	0	2	pandemia parcial
B 20201129 - 49	0	2	pandemia parcial
B 20201206 - 01	0	2	pandemia parcial
B 20201206 - 02	0	2	pandemia parcial
B 20201206 - 03	0	2	pandemia parcial
B 20201206 - 04	0	2	pandemia parcial
B 20201206 - 05	1	2	pandemia parcial
B 20201206 - 06	0	2	pandemia parcial
B 20201206 - 07	0	2	pandemia parcial
B 20201206 - 08	0	2	pandemia parcial
B 20201206 - 09	0	2	pandemia parcial
B 20201206 - 10	0	2	pandemia parcial
B 20201206 - 11	0	2	pandemia parcial
B 20201206 - 12	0	2	pandemia parcial
B 20201206 - 13	0	2	pandemia parcial
B 20201206 - 14	0	2	pandemia parcial
B 20201206 - 15	0	2	pandemia parcial
B 20201206 - 16	0	2	pandemia parcial
B 20201206 - 17	0	2	pandemia parcial
B 20201206 - 18	0	2	pandemia parcial
B 20201206 - 19	0	2	pandemia parcial
B 20201206 - 20	0	2	pandemia parcial
B 20201206 - 21	1	2	pandemia parcial
B 20201206 - 22	0	2	pandemia parcial
B 20201206 - 23	0	2	pandemia parcial
B 20201206 - 24	0	2	pandemia parcial
B 20201206 - 25	1	2	pandemia parcial
B 20201206 - 26	0	2	pandemia parcial
B 20201206 - 27	0	2	pandemia parcial
B 20201206 - 28	0	2	pandemia parcial
B 20201206 - 29	0	2	pandemia parcial
B 20201206 - 30	0	2	pandemia parcial
B 20201206 - 31	0	2	pandemia parcial
B 20201206 - 32	0	2	pandemia parcial
B 20201206 - 33	0	2	pandemia parcial
B 20201206 - 34	0	2	pandemia parcial
B 20201206 - 35	0	2	pandemia parcial
B 20201206 - 36	0	2	pandemia parcial
B 20201206 - 37	0	2	pandemia parcial
B 20201206 - 38	0	2	pandemia parcial
B 20201206 - 39	0	2	pandemia parcial
B 20201206 - 40	0	2	pandemia parcial
B 20201206 - 41	0	2	pandemia parcial
B 20201206 - 42	0	2	pandemia parcial
B 20201206 - 43	0	2	pandemia parcial
B 20201213 - 01	0	2	pandemia parcial
B 20201213 - 02	0	2	pandemia parcial
B 20201213 - 03	0	2	pandemia parcial
B 20201213 - 04	0	2	pandemia parcial
B 20201213 - 05	0	2	pandemia parcial
B 20201213 - 06	0	2	pandemia parcial
B 20201213 - 07	0	2	pandemia parcial
B 20201213 - 08	0	2	pandemia parcial
B 20201213 - 09	0	2	pandemia parcial
B 20201213 - 10	0	2	pandemia parcial
B 20201213 - 11	0	2	pandemia parcial
B 20201213 - 12	0	2	pandemia parcial
B 20201213 - 13	0	2	pandemia parcial
B 20201213 - 14	0	2	pandemia parcial
B 20201213 - 15	0	2	pandemia parcial
B 20201213 - 16	0	2	pandemia parcial
B 20201213 - 17	0	2	pandemia parcial
B 20201213 - 18	0	2	pandemia parcial
B 20201213 - 19	0	2	pandemia parcial
B 20201213 - 20	0	2	pandemia parcial
B 20201213 - 21	0	2	pandemia parcial
B 20201213 - 22	0	2	pandemia parcial
B 20201213 - 23	0	2	pandemia parcial
B 20201213 - 24	0	2	pandemia parcial
B 20201213 - 25	0	2	pandemia parcial
B 20201213 - 26	0	2	pandemia parcial
B 20201213 - 27	0	2	pandemia parcial
B 20201213 - 28	0	2	pandemia parcial
B 20201213 - 29	0	2	pandemia parcial
B 20201213 - 30	0	2	pandemia parcial
B 20201213 - 31	0	2	pandemia parcial
B 20201220 - 01	0	2	pandemia parcial
B 20201220 - 02	0	2	pandemia parcial
B 20201220 - 03	0	2	pandemia parcial
B 20201220 - 04	0	2	pandemia parcial
B 20201220 - 05	0	2	pandemia parcial
B 20201220 - 06	0	2	pandemia parcial
B 20201220 - 07	0	2	pandemia parcial
B 20201220 - 08	0	2	pandemia parcial
B 20201220 - 09	0	2	pandemia parcial
B 20201220 - 10	0	2	pandemia parcial
B 20201220 - 11	0	2	pandemia parcial
B 20201220 - 12	0	2	pandemia parcial
B 20201220 - 13	0	2	pandemia parcial
B 20201220 - 14	0	2	pandemia parcial
B 20201220 - 15	0	2	pandemia parcial
B 20201220 - 16	0	2	pandemia parcial
B 20201220 - 17	0	2	pandemia parcial
B 20201220 - 18	0	2	pandemia parcial
B 20201220 - 19	0	2	pandemia parcial
B 20201220 - 20	0	2	pandemia parcial
B 20201220 - 21	0	2	pandemia parcial
B 20201220 - 22	0	2	pandemia parcial
B 20201220 - 23	0	2	pandemia parcial
B 20201220 - 24	0	2	pandemia parcial
B 20201220 - 25	0	2	pandemia parcial
B 20201220 - 26	0	2	pandemia parcial
B 20201220 - 27	0	2	pandemia parcial
B 20201220 - 28	0	2	pandemia parcial
B 20201220 - 29	0	2	pandemia parcial
B 20210117 - 01	0	1	pandemia total
B 20210117 - 02	0	1	pandemia total
B 20210117 - 03	0	1	pandemia total
B 20210117 - 04	0	1	pandemia total
B 20210117 - 05	0	1	pandemia total
B 20210117 - 06	0	1	pandemia total
B 20210117 - 07	0	1	pandemia total
B 20210117 - 08	0	1	pandemia total
B 20210117 - 09	0	1	pandemia total
B 20210117 - 10	0	1	pandemia total
B 20210117 - 11	0	1	pandemia total
B 20210117 - 12	0	1	pandemia total
B 20210117 - 13	0	1	pandemia total
B 20210117 - 14	0	1	pandemia total
B 20210124 - 01	1	1	pandemia total
B 20210124 - 02	0	1	pandemia total
B 20210124 - 03	0	1	pandemia total
B 20210124 - 04	0	1	pandemia total
B 20210124 - 05	1	1	pandemia total
B 20210124 - 06	0	1	pandemia total
B 20210124 - 07	0	1	pandemia total
B 20210124 - 08	0	1	pandemia total
B 20210124 - 09	0	1	pandemia total
B 20210124 - 10	0	1	pandemia total
B 20210124 - 11	0	1	pandemia total
B 20210124 - 12	0	1	pandemia total
B 20210207 - 01	0	1	pandemia total
B 20210207 - 02	0	1	pandemia total
B 20210207 - 03	1	1	pandemia total
B 20210207 - 04	0	1	pandemia total
B 20210207 - 05	0	1	pandemia total
B 20210207 - 06	0	1	pandemia total
B 20210207 - 07	0	1	pandemia total
B 20210207 - 08	0	1	pandemia total
B 20210207 - 09	0	1	pandemia total
B 20210207 - 10	0	1	pandemia total
B 20210207 - 11	0	1	pandemia total
B 20210207 - 12	0	1	pandemia total
B 20210207 - 13	0	1	pandemia total
B 20210207 - 14	0	1	pandemia total
B 20210207 - 15	0	1	pandemia total
B 20210207 - 16	0	1	pandemia total
B 20210207 - 17	0	1	pandemia total
B 20210207 - 18	0	1	pandemia total
B 20210207 - 19	0	1	pandemia total
B 20210207 - 20	0	1	pandemia total
B 20210207 - 21	0	1	pandemia total
B 20210207 - 22	0	1	pandemia total
B 20210207 - 23	0	1	pandemia total
B 20210207 - 24	0	1	pandemia total
B 20210207 - 25	0	1	pandemia total
B 20210207 - 26	0	1	pandemia total
B 20210207 - 27	0	1	pandemia total
B 20210207 - 28	0	1	pandemia total
B 20210207 - 29	0	1	pandemia total
B 20210207 - 30	0	1	pandemia total
B 20210207 - 31	0	1	pandemia total
B 20210207 - 32	0	1	pandemia total
B 20210207 - 33	0	1	pandemia total
B 20210207 - 34	0	1	pandemia total
B 20210207 - 35	0	1	pandemia total
B 20210214 - 01	0	1	pandemia total
B 20210214 - 02	0	1	pandemia total
B 20210214 - 03	0	1	pandemia total
B 20210214 - 04	0	1	pandemia total
B 20210214 - 05	0	1	pandemia total
B 20210214 - 06	0	1	pandemia total
B 20210214 - 07	0	1	pandemia total
B 20210214 - 08	0	1	pandemia total
B 20210214 - 09	0	1	pandemia total
B 20210214 - 10	0	1	pandemia total
B 20210214 - 11	0	1	pandemia total
B 20210214 - 12	0	1	pandemia total
B 20210214 - 13	0	1	pandemia total
B 20210214 - 14	0	1	pandemia total
B 20210214 - 15	0	1	pandemia total
B 20210214 - 16	0	1	pandemia total
B 20210214 - 17	0	1	pandemia total
B 20210214 - 18	0	1	pandemia total
B 20210214 - 19	0	1	pandemia total
B 20210214 - 20	0	1	pandemia total
B 20210214 - 21	0	1	pandemia total
B 20210214 - 22	0	1	pandemia total
B 20210214 - 23	0	1	pandemia total
B 20210214 - 24	0	1	pandemia total
B 20210214 - 25	0	1	pandemia total
B 20210214 - 26	0	1	pandemia total
B 20210214 - 27	0	1	pandemia total
B 20210214 - 28	0	1	pandemia total
B 20210214 - 29	0	1	pandemia total
B 20210214 - 30	0	1	pandemia total
B 20210214 - 31	0	1	pandemia total
B 20210214 - 32	0	1	pandemia total
B 20210214 - 33	0	1	pandemia total
B 20210214 - 34	0	1	pandemia total
B 20210214 - 35	0	1	pandemia total
B 20210214 - 36	0	1	pandemia total
B 20210214 - 37	0	1	pandemia total
B 20210214 - 38	0	1	pandemia total
B 20210221 - 01	0	1	pandemia total
B 20210221 - 02	0	1	pandemia total
B 20210221 - 03	0	1	pandemia total
B 20210221 - 04	1	1	pandemia total
B 20210221 - 05	0	1	pandemia total
B 20210221 - 06	1	1	pandemia total
B 20210221 - 07	0	1	pandemia total
B 20210221 - 08	0	1	pandemia total
B 20210221 - 09	0	1	pandemia total
B 20210221 - 10	0	1	pandemia total
B 20210221 - 11	0	1	pandemia total
B 20210221 - 12	0	1	pandemia total
B 20210221 - 13	0	1	pandemia total
B 20210221 - 14	0	1	pandemia total
B 20210221 - 15	0	1	pandemia total
B 20210221 - 16	0	1	pandemia total
B 20210221 - 17	0	1	pandemia total
B 20210221 - 18	0	1	pandemia total
B 20210221 - 19	0	1	pandemia total
B 20210221 - 20	0	1	pandemia total
B 20210221 - 21	0	1	pandemia total
B 20210221 - 22	0	1	pandemia total
B 20210221 - 23	0	1	pandemia total
B 20210221 - 24	0	1	pandemia total
B 20210221 - 25	0	1	pandemia total
B 20210221 - 26	0	1	pandemia total
B 20210221 - 27	0	1	pandemia total
B 20210221 - 28	0	1	pandemia total
B 20210221 - 29	0	1	pandemia total
B 20210221 - 30	0	1	pandemia total
B 20210228 - 01	0	1	pandemia total
B 20210228 - 02	0	1	pandemia total
B 20210228 - 03	0	1	pandemia total
B 20210228 - 04	0	1	pandemia total
B 20210228 - 05	0	1	pandemia total
B 20210228 - 06	0	1	pandemia total
B 20210228 - 07	0	1	pandemia total
B 20210228 - 08	0	1	pandemia total
B 20210228 - 09	0	1	pandemia total
B 20210228 - 10	0	1	pandemia total
B 20210228 - 11	0	1	pandemia total
B 20210228 - 12	0	1	pandemia total
B 20210228 - 13	0	1	pandemia total
B 20210228 - 14	0	1	pandemia total
B 20210228 - 15	1	1	pandemia total
B 20210228 - 16	0	1	pandemia total
B 20210228 - 17	0	1	pandemia total
B 20210228 - 18	0	1	pandemia total
B 20210228 - 19	0	1	pandemia total
B 20210228 - 20	0	1	pandemia total
B 20210228 - 21	0	1	pandemia total
B 20210228 - 22	0	1	pandemia total
B 20210228 - 23	0	1	pandemia total
B 20210228 - 24	0	1	pandemia total
B 20210228 - 25	0	1	pandemia total

## Sheet: Hoja 8
Fecha	# de pellets	% de pellets con plastico
2018-10-15	137	0.080292
2018-11-21	138	0			2018	2019	2020	2021
2018-12-19	95	0.0631579		Pellets con plástico
2019-01-22	15	0.133333		Pellets sin plástico
2019-02-19	11	0.0909091
2019-07-22	77	0.103896
2019-08-23	60	0.1
2019-09-30	35	0.171429
2019-10-27	90	0.0555556
2019-11-21	51	0.117647
2019-12-22	90	0.188889
2020-07-08	11	0
2020-07-22	14	0
2020-08-18	18	0
2020-09-22	18	0
2020-10-25	66	0.106061
2020-11-01	77	0.038961
2020-11-08	48	0
2020-11-15	47	0.0212766
2020-11-22	42	0.0238095
2020-11-29	49	0.0408163
2020-12-06	43	0.0697674
2020-12-13	31	0.0322581
2020-12-20	29	0
2021-01-17	14	0
2021-01-24	12	0.166667
2021-02-07	35	0.0285714
2021-02-14	38	0.0263158
2021-02-21	30	0.133333
2021-02-28	25	0.08

## Sheet: Tabla de contingencia
	Pre - pandemia	Pandemia con restricciones	Pandemia con restricciones parciales
Con plástico
Sin plástico								Pre - pandemia - contaminación antropogenica	Fecha (A/M/D)	DS	Etapa	Info	Link
									2018-10-15	-	pre - pandemia / libre acceso a playas	-	-
									2018-11-21	-	pre - pandemia / libre acceso a playas	-	-
									2018-12-19	-	pre - pandemia / libre acceso a playas	-	-
				sin restricción					2019-01-22	-	pre - pandemia / libre acceso a playas	-	-
				con restricción					2019-02-19	-	pre - pandemia / libre acceso a playas	-	-
				restricciones parciales					2019-07-22	-	pre - pandemia / libre acceso a playas	-	-
									2019-08-23	-	pre - pandemia / libre acceso a playas	-	-
									2019-09-30	-	pre - pandemia / libre acceso a playas	-	-
									2019-10-27	-	pre - pandemia / libre acceso a playas	-	-
									2019-11-21	-	pre - pandemia / libre acceso a playas	-	-
									2019-12-22	-	pre - pandemia / libre acceso a playas	-	-
								Pandemia total- Sin contaminación antropogenica	2020-07-08	Nº 116-2020 PCM	Pandemia - Sin contaminación antropogenica
									2020-07-22	Nº 116-2020 PCM	Pandemia - Sin contaminación antropogenica	Se prorroga el estado de Emergencia Nacional del 1 al 31 de julio del 2020 declarado mediante el decreto supremo Nº 044 - 2020
									2020-08-18	Nº 135-2020 PCM	Pandemia - Sin contaminación antropogenica	Se prorroga el Estado de Emergencia hasta el 31 de agosto (averiguar desde que fecha)	https://busquedas.elperuano.pe/normaslegales/decreto-supremo-que-prorroga-el-estado-de-emergencia-naciona-decreto-supremo-n-135-2020-pcm-1874483-1/
									2020-09-22	Nº 146-2020 PCM	Pandemia - Sin contaminación antropogenica	Se prorroga el Estado de Emergencia que rige del 1 al 30 de septiembre. Durante la misma, queda restringido la libertad de reunión y de tránsito en el territorio. Asimismo, se dispone la inmovilización social obligatoria de todas las personas en sus domicilios desde las 22.00 horas hasta las 04.00 horas del día siguiente. De igual modo, se ha dispuesto que el día domingo la inmovilización social …	https://busquedas.elperuano.pe/normaslegales/aprueban-la-directiva-administrativa-que-regula-la-cobertura-resolucion-jefatural-no-146-2020sis-1903230-1/
								Pandemia parcial / Poca contaminación antropogenica	2020-10-25	Nº 170-2020-PCM	Pandemia parcial / Poca contaminación antropogenica	Artículo 4. En ese sentido, durante la primera etapa, para el departamento de Lima y la provincia Constitucional del Callao, los días viernes, sábados y domingos, no se hará uso de las zonas de descanso de arena o piedras inmediatamente colindantes con el mar, ni de la zona de mar; exceptuándose la realización de deportes acuáticos sin contacto, tales como: Surf, Vela, Remo, entre otros, que se d…	https://cdn.www.gob.pe/uploads/document/file/1399244/Decreto%20Supremo%20170-2020-PCM.pdf.pdf
									2020-11-01	N 174-2020 PCM (Aplica del 1 de noviembre al 30 de noviembre)	Pandemia parcial / Poca contaminación antropogenica	Artículo 1. A partir del domingo 01 de noviembre de 2020 hasta el lunes 30 de noviembre de 2020, por las graves circunstancias que afectan la vida de la Nación a consecuencia del COVID-19.	https://busquedas.elperuano.pe/normaslegales/decreto-supremo-que-prorroga-el-estado-de-emergencia-naciona-decreto-supremo-n-174-2020-pcm-1898227-1/
									2020-11-08	N 174-2020 PCM (Aplica del 1 de noviembre al 30 de noviembre)	Pandemia parcial / Poca contaminación antropogenica	-	-
									2020-11-15	N 174-2020 PCM (Aplica del 1 de noviembre al 30 de noviembre)	Pandemia parcial / Poca contaminación antropogenica	-	-
									2020-11-22	N 174-2020 PCM (Aplica del 1 de noviembre al 30 de noviembre)	Pandemia parcial / Poca contaminación antropogenica	-	-
									2020-11-29	N 174-2020 PCM (Aplica del 1 de noviembre al 30 de noviembre)	Pandemia parcial / Poca contaminación antropogenica	-	-
									2020-12-06	Nº 184-2020 - PCM (aplica del 1 de diciembre al 31 de diciembre)	Pandemia parcial / Poca contaminación antropogenica	Artículo. 13 - uso de playas: los días viernes, sábados y domingos, no se hará uso de las zonas de descanso de arena o piedras inmediatamente colindantes con el mar, ni de la zona de mar; exceptuándose la realización de deportes acuáticos sin contacto, tales como: Surf, Vela, Remo. De lunes a jueves se puede ingresar con distanciamiento social. En todos los casos, no se encuentra permitido el con…	https://busquedas.elperuano.pe/normaslegales/decreto-supremo-que-declara-estado-de-emergencia-nacional-po-decreto-supremo-n-184-2020-pcm-1907451-1/
									2020-12-13	Nº 184-2020 - PCM (aplica del 1 de diciembre al 31 de diciembre)	Pandemia parcial / Poca contaminación antropogenica	-	-
									2020-12-20	Nº 202-2020 (aplica del 22 de diciembre al 4 de enero)	Pandemia parcial / Poca contaminación antropogenica	Artículo 3. A partir del 22 de diciembre del presente año hasta el 04 de enero del 2021, en los departamentos de Tumbes, Piura, Lambayeque, La Libertad, Lima, en la provincia del Santa del departamento de Ancash y en la provincia Constitucional del Callao, no se hará uso de las zonas de descanso de arena o piedras inmediatamente colindantes con el mar, ni de la zona de mar, con las excepciones pr…	https://busquedas.elperuano.pe/normaslegales/decreto-supremo-que-modifica-disposiciones-establecidas-en-e-decreto-supremo-n-202-2020-pcm-1914478-1/
								Pandemia total - Sin contaminación antropogenica	2021-01-17	Nº 206-2020-PCM (aplica del 31 de diciembre hasta el 17 de enero)	Pandemia - Sin contaminación antropogenica	Atículo 3. A partir del 31 de diciembre del presente año hasta el 17 de enero del 2021, en los departamentos de Ica, Arequipa, Moquegua, Tacna, Tumbes, Piura, Lambayeque, La Libertad, Lima, en las provincias de Huarmey, Casma y Santa del departamento de Ancash y en la provincia Constitucional del Callao, no se hará uso de las zonas de descanso de arena o piedras inmediatamente colindantes con el …	https://img.lpderecho.pe/wp-content/uploads/2020/12/Decreto-Supremo-206-2020-LP.pdf
									2021-01-24	Nº 002 - 2021-PCM (hasta el 31 de enero)	Pandemia - Sin contaminación antropogenica	Artículo 3. No se hará uso de las zonas de descanso de arena o piedras inmediatamente colindantes con el mar, ni de la zona de mar ni de la zona de mar, con las excepciones previstas en el artículo 13 del Decreto Supremo N° 184-2020-PCM.	https://busquedas.elperuano.pe/normaslegales/decreto-supremo-que-modifica-disposiciones-establecidas-en-e-decreto-supremo-n-002-2021-pcm-1919609-2/
									2021-02-07	Nº 008-2021 (01/02 - 28/02)	Pandemia - Sin contaminación antropogenica	Artículo 3. Hasta el 14 de febrero del 2021, en los departamentos de Ica, Arequipa, Moquegua, Tacna, Tumbes, Piura, Lambayeque, La Libertad, Lima, Ancash y en la provincia Constitucional del Callao, no se hará uso de las zonas de descanso de arena o piedras inmediatamente colindantes con el mar, de la zona de mar, ni de la ribera de ríos, lagos o lagunas, con las excepciones previstas en el artíc…	https://busquedas.elperuano.pe/normaslegales/decreto-supremo-que-prorroga-el-estado-de-emergencia-naciona-decreto-supremo-n-008-2021-pcm-1923103-1/
									2021-02-14	N° 023-2021-PCM (14/02 - 28/02)	Pandemia - Sin contaminación antropogenica	Artículo 14. Hasta el 28 de febrero del 2021, a nivel nacional, no se hará uso de las zonas de descanso de arena o piedras inmediatamente colindantes con el mar, de la zona de mar, ni de la ribera de ríos, lagos o lagunas, con las excepciones previstas en el artículo 13 del Decreto Supremo Nº 184-2020-PCM. La realización de deportes acuáticos sin contacto y con distanciamiento físico o corporal n…	https://busquedas.elperuano.pe/normaslegales/decreto-supremo-que-aprueba-el-nivel-de-alerta-por-provincia-decreto-supremo-n-023-2021-pcm-1927784-1/
									2021-02-21	N° 023-2021-PCM (14/02 - 28/02)	Pandemia - Sin contaminación antropogenica	-	-
									2021-02-28	Nº 282-2021 (emitida el 24 de febrero)	Post - pandemia Aprueban el uso de las playas	Articulo 1. Se aprueba la directiva sanitaria N 130 - MINSA/2021/DIGESA '' Directiva Sanitaria para el uso de playas de baño en el marco del COVID - 19	https://cdn.www.gob.pe/uploads/document/file/1691715/Resoluci%C3%B3n%20Ministerial%20N%C2%B0%20282-2021-MINSA.pdf
